# Supplementary material for: Identification of QTL conferring resistance to stripe rust (Puccinia striiformis f. sp. hordei) and leaf rust (Puccinia hordei) in barley using nested association mapping (NAM)
Source: PLoS One. 2018 Jan 25;13(1):e0191666. doi: 10.1371/journal.pone.0191666 (PMC5784946; doi:10.1371/journal.pone.0191666)
Supplement: S2 File — (XLSX) [file pone.0191666.s002.xlsx]

## Sheet: info
Information to column names of the following tables
The BARLEYMAP pipeline (Cantalapiedra et al., 2015 and http://floresta.eead.csic.es/barleymap/) was used to identify potential candidate genes underlying the particularly robust QTL of this study by aligning the associated markers showing a DR >50% against the barley physical map (IBGS, 2012) and the POPSEQ map (Mascher et al., 2013). The gene search was extended to an interval of ±4cM around mar…
Column name	Description
Marker	SNP located in the extended ±4cM QTL intervall (extended), position of best sequence alignment (alignment) based on the sequence of the identified peak marker with detection rate >50%, referenced in Table 2 of main text.
Chr	Chromosome position of the SNP (based on POPSEQ map; Mascher et al., 2013)
cM	cM position of the SNP (based on POPSEQ map; Mascher et al., 2013)
Base pairs	Base pair position associated with this SNP based on Barley Physical Map (IBSC 2012 data)
barlex_pos_bp	Base pair position associated with the QTL peak marker based on Morex Pseudomolecule 2016 (https://apex.ipk-gatersleben.de/apex/f?p=284:42:::NO:RP:P42_MARKER_CHOICE:2)
Multiple positions	Info, whether the query sequence has more than one mapping position in the current map. However, a sequence with more than one alignment target is not considered as having multiple positions if only one map position was found
Other alignments	Info, whether the query sequence has other alignment targets, which lack map position
Gene	Gene identifier
HC/LC	Info, whether the gene is classified with high confidence or low confidence in the IBSC data
Chr	Chromosome position of the gene (based on POPSEQ map; Mascher et al., 2013)
cM	cM position of the gene (based on POPSEQ map; Mascher et al., 2013)
Bp	Base pair position associated to this gene based on Barley Physical Map (IBSC 2012 data)
Description	Human readable description of gene
InterPro	Identifiers of the domains detected in the gene
Signatures	Predictive models obtained from InterPro's signatures
GO terms	Identifiers of the GeneOntology terms annotated for this gene
Total of relevant GO terms:	Table showing all GO-Terms defined to be relevant for the traits evaluated (for details see material and methods)

## Sheet: QPs.1H-1
Supporting Information | Alignment of markers with DR >50% using BARLEYMAP
Markera	Chr	cM	Base pairs	barlex_pos_bp	Multiple positions	Other alignments	Gene	HC/LC	Chr	cM	Bp	Description	InterPro	Signatures	GO terms									total of relevant GO terms:
extended	1	-	-		Yes	Yes	MLOC_62827.1	LC	1	91.67	418543400	-	-	-	-
extended	1	-	-		Yes	Yes	MLOC_62828.1	HC	1	91.67	418543400	-	-	-	-									GO:0000166	name: nucleotide binding	namespace: molecular_function
extended	1	-	-		Yes	Yes	AK374517	HC	1	91.8	418543400	Lipid-binding START	IPR002913	PF01852										GO:0019001	name: guanyl nucleotide binding	namespace: molecular_function
extended	1	-	-		Yes	Yes	MLOC_3599.1	HC	1	92.21	418543400	DNA polymerase delta, subunit 4	IPR007218	PF04081	GO:0005634	GO:0006260								GO:0050660	name: flavin adenine dinucleotide binding	namespace: molecular_function
extended	1	-	-		Yes	Yes	AK367106	HC	1	92.35	418818680	Protein of unknown function DUF616	IPR006852	PTHR12956:SF1,PF04765,PTHR12956										GO:0004096	name: catalase activity	namespace: molecular_function
extended	1	-	-		Yes	Yes	AK370126	HC	1	92.35	418818680	ATPase, AAA-2;Clp ATPase, C-terminal;Clp, N-terminal;Chaperonin ClpA/B;ATPase, AAA-type, core;ATPase, AAA+ type, core;Chaperonin ClpA/B, conserved site	IPR013093,IPR019489,IPR004176,IPR001270,IPR003959,IPR003593,IPR018368	PF07724,PTHR11638,PF10431,PF02861,PS00871,PF00004,SM00382,PR00300,PTHR11638:SF50,PS00870	GO:0005524	GO:0019538	GO:0000166	GO:0017111						GO:0006952	name: defense response	namespace: biological_process
extended	1	-	-		Yes	Yes	MLOC_51908.1	LC	1	92.35	418818680	-	-	-	-									GO:0050832	name: defense response to fungus	namespace: biological_process
extended	1	-	-		Yes	Yes	MLOC_51909.2	LC	1	92.35	418818680	-	-	-	-									GO:0004568	name: chitinase activity	namespace: molecular_function
extended	1	-	-		Yes	Yes	MLOC_66582.1	HC	1	92.35	418818680	Zinc/iron permease	IPR003689	PF02535	GO:0046873	GO:0030001	GO:0016020	GO:0055085						GO:0004601	name: peroxidase activity	namespace: molecular_function
extended	1	-	-		Yes	Yes	MLOC_75684.1	LC	1	92.35	418818680	-	-	-	-									GO:0005777	name: peroxisome	namespace: cellular_component
extended	1	-	-		Yes	Yes	MLOC_79667.1	LC	1	92.35	418818680	-	-	-	-									GO:0006950	name: response to stress	namespace: biological_process
extended	1	-	-		Yes	Yes	MLOC_42328.1	LC	1	92.35	419628400	-	-	-	-									GO:0006979	name: response to oxidative stress	namespace: biological_process
extended	1	-	-		Yes	Yes	MLOC_69409.1	LC	1	92.44	419628400	-	-	-	-									GO:0007186	name: G-protein coupled receptor signaling pathway	namespace: biological_process
extended	1	-	-		Yes	Yes	AK369582	HC	1	92.49	419628400	Peptidase S16, lon N-terminal	IPR003111	PTHR14255,PF02190	GO:0006508	GO:0004176								GO:0007205	name: protein kinase C-activating G-protein coupled receptor signaling pathway	namespace: biological_process
extended	1	-	-		Yes	Yes	MLOC_54908.1	HC	1	92.49	419628400	Serine-threonine/tyrosine-protein kinase	IPR001245	PF07714	GO:0004672	GO:0006468								GO:0008020	name: G-protein coupled photoreceptor activity	namespace: molecular_function
extended	1	-	-		Yes	Yes	AK368628	HC	1	92.88	421050680	Zinc finger, PHD-finger;Homeobox;Zinc finger, PHD-type;Zinc finger, PHD-type, conserved site	IPR019787,IPR001356,IPR001965,IPR019786	PS50016,SM00389,PTHR12628,PTHR12628:SF11,SM00249,PF00046,PS50071,PF00628,PS01359	GO:0005515	GO:0003700	GO:0043565	GO:0006355	GO:0008270	GO:0005515				GO:0008262	name: nuclear export signal receptor activity	namespace: molecular_function
extended	1	-	-		Yes	Yes	MLOC_72532.1	HC	1	92.88	421050680	Trehalose-phosphatase;Glycosyl transferase, family 20	IPR003337,IPR001830	PF02358,PF00982	GO:0003824	GO:0005992	GO:0005992	GO:0003824						GO:0004970	name: ionotropic glutamate receptor activity	namespace: molecular_function
extended	1	-	-		Yes	Yes	MLOC_29474.1	LC	1	92.99	421050680	-	-	-	-									GO:0016998	name: cell wall macromolecule catabolic process	namespace: biological_process
extended	1	-	-		Yes	Yes	AK367460	LC	1	93.06	421950920	-	-	-	-									GO:0005618	name: cell wall	namespace: cellular_component
extended	1	-	-		Yes	Yes	AK376294	HC	1	93.06	421950920	-	-	-	-									GO:0042545	name: cell wall modification	namespace: biological_process
extended	1	-	-		Yes	Yes	MLOC_11493.1	LC	1	93.06	421950920	-	-	-	-									GO:0042546	name: cell wall biogenesis	namespace: biological_process
extended	1	-	-		Yes	Yes	MLOC_49118.1	LC	1	93.06	421950920	-	-	-	-									GO:0008219	name: cell death	namespace: biological_process
extended	1	-	-		Yes	Yes	MLOC_60622.1	HC	1	93.06	421950920	VQ	IPR008889	PF05678										GO:0005035	name: death receptor activity	namespace: molecular_function
extended	1	-	-		Yes	Yes	MLOC_68468.1	HC	1	93.06	421950920	Protein of unknown function DUF584	IPR007608	PF04520										GO:0005037	name: obsolete death receptor adaptor protein activity	namespace: molecular_function
extended	1	-	-		Yes	Yes	MLOC_70429.1	HC	1	93.06	421950920	Small GTPase superfamily;Small GTPase superfamily, Rab type	IPR001806,IPR003579	PF00071,PTHR24073,PTHR24073:SF260,PS51419,SM00175,PR00449	GO:0007264	GO:0005525	GO:0005525	GO:0015031	GO:0007264					GO:0005038	name: obsolete death receptor interacting protein activity	namespace: molecular_function
extended	1	-	-		Yes	Yes	MLOC_70855.1	LC	1	93.06	421950920	-	-	-	-									GO:0005039	name: obsolete death receptor-associated factor activity	namespace: molecular_function
extended	1	-	-		Yes	Yes	MLOC_70856.1	LC	1	93.06	421950920	-	-	-	-									GO:0005040	name: decoy death receptor activity	namespace: molecular_function
extended	1	-	-		Yes	Yes	AK354831	HC	1	93.06	422290680	Transferase	IPR003480	PF02458	GO:0016747									GO:0005123	name: death receptor binding	namespace: molecular_function
extended	1	-	-		Yes	Yes	AK358207	HC	1	93.06	422290680	Major facilitator superfamily domain;Major facilitator superfamily	IPR020846,IPR011701	PS50850,PTHR11662,PF07690,PTHR11662:SF23	GO:0016021	GO:0055085								GO:0010343	name: singlet oxygen-mediated programmed cell death	namespace: biological_process
extended	1	-	-		Yes	Yes	AK366048	HC	1	93.06	422290680	-	-	-	-									GO:0010421	name: hydrogen peroxide-mediated programmed cell death	namespace: biological_process
extended	1	-	-		Yes	Yes	MLOC_38783.1	HC	1	93.06	422290680	2',3'-cyclic-nucleotide 3'-phosphodiesterase	IPR012386	PF07823	GO:0004112									GO:0010623	name: programmed cell death involved in cell development	namespace: biological_process
extended	1	-	-		Yes	Yes	MLOC_38784.1	LC	1	93.06	422290680	-	-	-	-									GO:0010940	name: positive regulation of necrotic cell death	namespace: biological_process
extended	1	-	-		Yes	Yes	MLOC_63575.2	HC	1	93.06	422290680	Plant methyltransferase dimerisation;O-methyltransferase, family 2	IPR012967,IPR001077	PTHR11746,PF08100,PF00891	GO:0008168	GO:0046983	GO:0008171							GO:0010941	name: regulation of cell death	namespace: biological_process
extended	1	-	-		Yes	Yes	AK372514	HC	1	93.12	422290680	Heat shock protein DnaJ, N-terminal	IPR001623	PF00226	GO:0031072									GO:0010942	name: positive regulation of cell death	namespace: biological_process
extended	1	-	-		Yes	Yes	MLOC_11569.1	HC	1	93.12	422290680	Heat shock protein DnaJ, N-terminal	IPR001623	PF00226	GO:0031072									GO:0012501	name: programmed cell death	namespace: biological_process
extended	1	-	-		Yes	Yes	MLOC_13292.1	LC	1	93.22	422290680	-	-	-	-									GO:0012502	name: induction of programmed cell death	namespace: biological_process
extended	1	-	-		Yes	Yes	MLOC_13293.1	LC	1	93.22	422290680	-	-	-	-									GO:0016265	name: obsolete death	namespace: biological_process
extended	1	-	-		Yes	Yes	AK357487	HC	1	93.38	423306240	Transcriptional factor B3;Auxin response factor	IPR003340,IPR010525	PF02362,PS50863,PF06507	GO:0006355	GO:0003677	GO:0005634	GO:0006355	GO:0009725	GO:0003677				GO:0012501	name: programmed cell death	namespace: biological_process
extended	1	-	-		Yes	Yes	AK357968	HC	1	93.38	423306240	Zinc finger, Dof-type	IPR003851	PD007478,PS50884,PS01361,PF02701	GO:0003677	GO:0008270	GO:0006355							GO:0006915	name: apoptotic process	namespace: biological_process
extended	1	-	-		Yes	Yes	MLOC_44531.1	HC	1	93.38	423306240	-	-	-	-									GO:0005524	name: ATP binding	namespace: molecular_function
extended	1	-	-		Yes	Yes	MLOC_11442.1	LC	1	93.38	422290680	-	-	-	-									GO:0004672	name: protein kinase activity	namespace: molecular_function
extended	1	-	-		Yes	Yes	MLOC_31691.1	LC	1	93.38	423306240	-	-	-	-									GO:0005515	protein binding	molecular function
extended	1	-	-		Yes	Yes	AK356382	HC	1	93.7	423306240	Protein of unknown function DUF688	IPR007789	PF05097
extended	1	-	-		Yes	Yes	AK360842	HC	1	93.7	423306240	Tubby, C-terminal, conserved site;Tubby, C-terminal;F-box domain, cyclin-like	IPR018066,IPR000007,IPR001810	PS01200,PS01201,PTHR16517:SF7,PF01167,PF00646,PTHR16517,PR01573	GO:0005515
extended	1	-	-		Yes	Yes	MLOC_44527.2	HC	1	93.7	423306240	-	-	-	-
extended	1	-	-		Yes	Yes	MLOC_65689.1	LC	1	93.7	423306240	-	-	-	-
extended	1	-	-		Yes	Yes	MLOC_68123.3	HC	1	93.7	423306240	Topoisomerase II-associated protein PAT1	IPR019167	PF09770
extended	1	-	-		Yes	Yes	AK366834	HC	1	93.77	423639800	Glycosyl transferase, family 14	IPR003406	PF02485	GO:0016020	GO:0008375
extended	1	-	-		Yes	Yes	AK367726	HC	1	93.77	423639800	Glycosyl transferase, family 14	IPR003406	PF02485	GO:0016020	GO:0008375
extended	1	-	-		Yes	Yes	MLOC_31683.1	HC	1	93.77	423639800	-	-	-	-
extended	1	-	-		Yes	Yes	MLOC_31734.1	HC	1	93.77	423639800	Reverse transcriptase	IPR000477	PF00078	GO:0006278	GO:0003723	GO:0003964
extended	1	-	-		Yes	Yes	MLOC_61532.1	HC	1	93.77	423639800	Domain of unknown function DUF250;Drug/metabolite transporter	IPR004853,IPR000620	PF03151,PF00892	GO:0016020
extended	1	-	-		Yes	Yes	AK376331	HC	1	93.87	423639800	Globin, subset	IPR000971	PF00042	GO:0020037	GO:0005506
extended	1	-	-		Yes	Yes	MLOC_27684.1	LC	1	93.98	423639800	-	-	-	-
extended	1	-	-		Yes	Yes	MLOC_38693.1	LC	1	93.98	423639800	-	-	-	-
extended	1	-	-		Yes	Yes	MLOC_10586.3	HC	1	94.17	423639800	Translation initiation factor IF- 2, domain 3;Protein synthesis factor, GTP-binding	IPR023115,IPR000795	PF11987,PF00009	GO:0005525	GO:0003924
extended	1	-	-		Yes	Yes	AK372041	HC	1	94.19	423639800	Peptidase S33, prolyl aminopeptidase;Alpha/beta hydrolase fold-1	IPR002410,IPR000073	PTHR10992:SF12,PR00793,PTHR10992,PF00561	GO:0006508	GO:0004177
extended	1	-	-		Yes	Yes	MLOC_55737.1	LC	1	94.33	423639800	-	-	-	-
extended	1	-	-		Yes	Yes	MLOC_55738.1	HC	1	94.33	423639800	Trehalose-phosphatase;Glycosyl transferase, family 20	IPR003337,IPR001830	PTHR10788,PF02358,PF00982	GO:0003824	GO:0005992	GO:0005992	GO:0003824
extended	1	-	-		Yes	Yes	AK375166	HC	1	94.62	423864240	NLI interacting factor	IPR004274	SM00577,PS50969,PF03031,PTHR12210,PTHR12210:SF3	GO:0005515
extended	1	-	-		Yes	Yes	MLOC_39378.1	HC	1	94.62	423864240	Nucleotide-diphospho-sugar transferase, predicted	IPR005069	PF03407
extended	1	-	-		Yes	Yes	MLOC_70266.1	HC	1	94.62	423864240	Transcription factor, TCP	IPR005333	PF03634
extended	1	-	-		Yes	Yes	MLOC_71099.4	HC	1	94.62	423864240	Protein of unknown function DUF803	IPR008521	PF05653
extended	1	-	-		Yes	Yes	AK377027	HC	1	94.69	423864240	Poly(ADP-ribose) polymerase, regulatory domain;PADR1;WGR domain;BRCT;Poly(ADP-ribose) polymerase, catalytic domain	IPR004102,IPR012982,IPR008893,IPR001357,IPR012317	PF02877,PF08063,PS51060,PF05406,PS50172,PTHR15447,SM00292,PF00644,PF00533,PS51059,SM00773	GO:0006471	GO:0003950	GO:0003950	GO:0005634	GO:0005622	GO:0003950
extended	1	-	-		Yes	Yes	AK371636	LC	1	94.69	424807880	-	-	-	-
extended	1	-	-		Yes	Yes	MLOC_28241.1	LC	1	94.69	424807880	-	-	-	-
extended	1	-	-		Yes	Yes	MLOC_4780.1	LC	1	94.69	424807880	-	-	-	-
extended	1	-	-		Yes	Yes	MLOC_4781.1	LC	1	94.69	424807880	-	-	-	-
extended	1	-	-		Yes	Yes	MLOC_52411.1	HC	1	94.69	424807880	-	-	-	-
extended	1	-	-		Yes	Yes	MLOC_10056.1	HC	1	94.72	424807880	Brevis radix-like domain;Regulator of chromosome condensation, RCC1;Zinc finger, FYVE-type	IPR013591,IPR000408,IPR000306	PF08381,PF00415,PF01363	GO:0046872
extended	1	-	-		Yes	Yes	MLOC_58126.1	HC	1	94.76	424807880	MULE transposase, conserved domain;Transcription factor, FAR1-related	IPR018289,IPR004330	PF10551,PF03101
extended	1	-	-		Yes	Yes	MLOC_69533.1	LC	1	94.81	424807880	-	-	-	-
extended	1	-	-		Yes	Yes	MLOC_61927.1	HC	1	95.11	425168720	Haloacid dehalogenase-like hydrolase;ATPase, P-type cation-transporter, C-terminal;ATPase, P-type, ATPase-associated domain;ATPase, P-type cation-transporter, N-terminal	IPR005834,IPR006068,IPR008250,IPR004014	PF00702,PF00689,PF00122,PF00690	GO:0003824	GO:0008152	GO:0016020	GO:0006754	GO:0006812	GO:0015662	GO:0000166	GO:0046872	GO:0015662	GO:0006812	GO:0006754	GO:0016020
extended	1	-	-		Yes	Yes	MLOC_2484.3	HC	1	95.18	425396880	-	-	-	-
extended	1	-	-		Yes	Yes	MLOC_66523.5	HC	1	95.18	425396880	Zeta toxin	IPR010488	PF06414	GO:0005524	GO:0001906
extended	1	-	-		Yes	Yes	MLOC_20044.1	LC	1	95.4	425396880	-	-	-	-
extended	1	-	-		Yes	Yes	AK356092	HC	1	95.47	425396880	Cellular retinaldehyde-binding/triple function, C-terminal;Cellular retinaldehyde-binding/triple function, N-terminal;Cellular retinaldehyde binding/alpha-tocopherol transport	IPR001251,IPR008273,IPR001071	PTHR23324:SF5,SM00516,PTHR23324,PF00650,PF03765,PR00180,PS50191	GO:0005622	GO:0005215	GO:0006810
alignment	1	95.61	425396880	516793811	No	No	AK248501.1	HC	1	95.61	425396880	ANTH	IPR011417	PF07651	GO:0005543
alignment	1	95.61	425396880		No	No	AK249327.1	HC	1	95.61	425396880	Transcription initiation factor IIF, beta subunit	IPR003196	PF02270	GO:0005674	GO:0005524	GO:0006367
alignment	1	95.61	425396880		No	No	AK354029	HC	1	95.61	425396880	Peptidase S10, serine carboxypeptidase	IPR001563	PF00450	GO:0004185	GO:0006508
alignment	1	95.61	425396880		No	No	AK360289	HC	1	95.61	425396880	Inositol-tetrakisphosphate 1-kinase	IPR008656	PF05770	GO:0005524	GO:0032957	GO:0000287	GO:0047325	GO:0005622	GO:0035300
alignment	1	95.61	425396880		No	No	AK363253	HC	1	95.61	425396880	Glycosyl transferase, family 2	IPR001173	PTHR10587:SF35,PTHR10587,PF00535
alignment	1	95.61	425396880		No	No	AK365289	HC	1	95.61	425396880	Peptidase S10, serine carboxypeptidase	IPR001563	PF00450	GO:0004185	GO:0006508
alignment	1	95.61	425396880		No	No	AK374068	HC	1	95.61	425396880	BSD	IPR005607	SM00751,PF03909
alignment	1	95.61	425396880		No	No	MLOC_10051.2	HC	1	95.61	425396880	Serine/threonine-protein kinase-like domain;Protein kinase, C-terminal	IPR017442,IPR017892	PF00069,PF00433	GO:0006468	GO:0005524	GO:0004672	GO:0004674	GO:0005524	GO:0006468
alignment	1	95.61	425396880		No	No	MLOC_1078.1	LC	1	95.61	425396880	-	-	-	-
alignment	1	95.61	425396880		No	No	MLOC_11675.1	LC	1	95.61	425396880	-	-	-	-
alignment	1	95.61	425396880		No	No	MLOC_11676.1	LC	1	95.61	425396880	-	-	-	-
alignment	1	95.61	425396880		No	No	MLOC_15211.2	LC	1	95.61	425396880	-	-	-	-
alignment	1	95.61	425396880		No	No	MLOC_18933.1	LC	1	95.61	425396880	-	-	-	-
alignment	1	95.61	425396880		No	No	MLOC_23817.1	LC	1	95.61	425396880	-	-	-	-
alignment	1	95.61	425396880		No	No	MLOC_24568.1	LC	1	95.61	425396880	-	-	-	-
alignment	1	95.61	425396880		No	No	MLOC_29656.1	LC	1	95.61	425396880	-	-	-	-
alignment	1	95.61	425396880		No	No	MLOC_4716.1	LC	1	95.61	425396880	-	-	-	-
alignment	1	95.61	425396880		No	No	MLOC_52380.1	LC	1	95.61	425396880	-	-	-	-
alignment	1	95.61	425396880		No	No	MLOC_52381.1	LC	1	95.61	425396880	-	-	-	-
alignment	1	95.61	425396880		No	No	MLOC_52793.1	LC	1	95.61	425396880	-	-	-	-
alignment	1	95.61	425396880		No	No	MLOC_62654.4	HC	1	95.61	425396880	Bacterial surface antigen (D15)	IPR000184	PF01103	GO:0019867
alignment	1	95.61	425396880		No	No	MLOC_66415.3	HC	1	95.61	425396880	Methyltransferase type 11	IPR013216	PF08241	GO:0008168	GO:0008152
alignment	1	95.61	425396880		No	No	MLOC_66416.1	LC	1	95.61	425396880	-	-	-	-
alignment	1	95.61	425396880		No	No	MLOC_67801.1	LC	1	95.61	425396880	-	-	-	-
alignment	1	95.61	425396880		No	No	MLOC_67802.1	HC	1	95.61	425396880	MULE transposase, conserved domain;Transcription factor, FAR1-related	IPR018289,IPR004330	PF10551,PF03101
alignment	1	95.61	425396880		No	No	MLOC_7463.1	LC	1	95.61	425396880	-	-	-	-
alignment	1	95.61	425396880		No	No	MLOC_76530.1	LC	1	95.61	425396880	-	-	-	-
alignment	1	95.61	425396880		No	No	AK355124	HC	1	95.61	428338160	Serine/threonine-protein kinase, active site;Protein kinase, ATP binding site;Serine/threonine-protein kinase-like domain;Protein kinase, catalytic domain	IPR008271,IPR017441,IPR017442,IPR000719	PS00108,PTHR11584,PS00107,PF00069,PTHR11584:SF259,PS50011	GO:0006468	GO:0004674	GO:0005524	GO:0006468	GO:0005524	GO:0004672	GO:0004672	GO:0006468	GO:0005524
alignment	1	95.61	425396880		No	No	AK366132	HC	1	95.61	428338160	Leucine-rich repeat;Serine-threonine/tyrosine-protein kinase	IPR001611,IPR001245	PF00560,PF07714	GO:0005515	GO:0004672	GO:0006468
alignment	1	95.61	425396880		No	No	AK371508	HC	1	95.61	428338160	MATH	IPR002083	PTHR24006:SF29,SM00061,PS50144,PF00917,PTHR24006	GO:0005515
alignment	1	95.61	425396880		No	No	AK372006	HC	1	95.61	428338160	Pentatricopeptide repeat	IPR002885	PF01535,PS51375,PTHR24015
alignment	1	95.61	425396880		No	No	AK374557	HC	1	95.61	428338160	Tesmin/TSO1-like, CXC	IPR005172	PTHR12446:SF4,PTHR12446,PF03638
alignment	1	95.61	425396880		No	No	AK375075	HC	1	95.61	428338160	Zinc finger, RING-type;BRCT;Zinc finger, C3HC4 RING-type;Zinc finger, PHD-type;Zinc finger, RING-type, conserved site	IPR001841,IPR001357,IPR018957,IPR001965,IPR017907	PS50089,PF00533,PF00097,SM00292,PTHR24015:SF71,PS50172,SM00184,SM00249,PTHR24015,PS00518	GO:0008270	GO:0005515	GO:0005622
alignment	1	95.61	425396880		No	No	AK376711	HC	1	95.61	428338160	Major facilitator superfamily	IPR011701	PF07690	GO:0016021	GO:0055085
alignment	1	95.61	425396880		No	No	MLOC_15476.1	HC	1	95.61	428338160	Serine-threonine/tyrosine-protein kinase;Leucine-rich repeat	IPR001245,IPR001611	PF07714,PF00560	GO:0004672	GO:0006468	GO:0005515
alignment	1	95.61	425396880		No	No	MLOC_15477.1	HC	1	95.61	428338160	Serine-threonine/tyrosine-protein kinase;Leucine-rich repeat	IPR001245,IPR001611	PF07714,PF00560	GO:0004672	GO:0006468	GO:0005515
alignment	1	95.61	425396880		No	No	MLOC_19688.1	LC	1	95.61	428338160	-	-	-	-
alignment	1	95.61	425396880		No	No	MLOC_22624.2	HC	1	95.61	428338160	Putative rRNA methylase	IPR010719	PF06962
alignment	1	95.61	425396880		No	No	MLOC_23189.1	HC	1	95.61	428338160	Putative harbinger transposase-derived nuclease	IPR006912	PF04827	GO:0016788
alignment	1	95.61	425396880		No	No	MLOC_38134.2	HC	1	95.61	428338160	DNA-binding TFAR19-related protein	IPR002836	PF01984	GO:0003677
alignment	1	95.61	425396880		No	No	MLOC_59470.1	HC	1	95.61	428338160	Peptidase C19, ubiquitin carboxyl-terminal hydrolase 2	IPR001394	PF00443	GO:0004221	GO:0006511
alignment	1	95.61	425396880		No	No	MLOC_60827.1	HC	1	95.61	428338160	MaoC-like dehydratase	IPR002539	PF01575	GO:0016491	GO:0008152
alignment	1	95.61	425396880		No	No	MLOC_60828.1	HC	1	95.61	428338160	Splicing factor 3B subunit 5/RDS3 complex subunit 10	IPR009846	PF07189,PTHR20978
alignment	1	95.61	425396880		No	No	MLOC_61698.1	HC	1	95.61	428338160	NADH:ubiquinone oxidoreductase, 24kDa subunit	IPR002023	PS01099,PF01257,PTHR10371	GO:0055114	GO:0016491	GO:0051287
alignment	1	95.61	425396880		No	No	MLOC_62591.1	HC	1	95.61	428338160	Primosome PriB/single-strand DNA-binding	IPR000424	PF00436	GO:0003697
alignment	1	95.61	425396880		No	No	MLOC_6843.2	HC	1	95.61	428338160	Glutamyl/glutaminyl-tRNA synthetase, class Ib, anti-codon binding domain;Glutamyl/glutaminyl-tRNA synthetase, class Ib, catalytic domain	IPR020059,IPR020058	PF03950,PF00749	GO:0005524	GO:0004812	GO:0006418	GO:0005737	GO:0000166	GO:0016876	GO:0000166	GO:0005524	GO:0043039	GO:0005737
alignment	1	95.61	425396880		No	No	MLOC_77109.1	HC	1	95.61	428338160	Transcription factor, FAR1-related;MULE transposase, conserved domain	IPR004330,IPR018289	PF03101,PF10551
alignment	1	95.61	425396880		No	No	AK252922.1	HC	1	95.61	428540280	-	-	-	-
alignment	1	95.61	425396880		No	No	AK367568	HC	1	95.61	428540280	Protein of unknown function DUF567;Initiation factor 2B-related	IPR007612,IPR000649	PTHR10233:SF7,PF04525,PTHR10233	GO:0044237
alignment	1	95.61	425396880		No	No	MLOC_25046.1	LC	1	95.61	428540280	-	-	-	-
alignment	1	95.61	425396880		No	No	MLOC_6734.2	LC	1	95.61	428540280	-	-	-	-
alignment	1	95.61	425396880		No	No	MLOC_6735.1	LC	1	95.61	428540280	-	-	-	-
alignment	1	95.61	425396880		No	No	MLOC_8140.1	LC	1	95.61	428540280	-	-	-	-
extended	1	-	-		Yes	Yes	MLOC_60759.2	HC	1	95.89	428540280	mRNA splicing factor, thioredoxin-like U5 snRNP	IPR004123	PF02966,PTHR12052	GO:0005681	GO:0007067
extended	1	-	-		Yes	Yes	MLOC_61697.2	HC	1	96.67	428540280	Pseudouridine synthase, TruD	IPR001656	PF01142	GO:0009451	GO:0001522	GO:0009982	GO:0003723
extended	1	-	-		Yes	Yes	MLOC_44522.1	LC	1	98.03	428540280	-	-	-	-
extended	1	-	-		Yes	Yes	AK376023	HC	1	98.69	429335120	Serine/threonine-protein kinase-like domain	IPR017442	PF00069	GO:0006468	GO:0005524	GO:0004672
aMarker located in the extended ±4cM intervall (extended), position of best sequence alignment (alignment)

## Sheet: QPs.2H-1
Supporting Information 2 | Alignment of markers with DR >50% using BARLEYMAP
Markera	Chr	cM	Base pairs	barlex_pos_bp	Multiple positions	Other alignments	Gene	HC/LC	Chr	cM	Bp	Description	InterPro	Signatures	GO terms									total of relevant GO terms:
extended	2	-	-		Yes	Yes	AK361281	HC	2	0	0	Transferase	IPR003480	PF02458	GO:0016747
extended	2	-	-		Yes	Yes	AK370295	HC	2	0	0	Eukaryotic initiation factor 3, gamma subunit	IPR007316	PF04189,PTHR12945	GO:0003743	GO:0006413															GO:0000166	name: nucleotide binding	namespace: molecular_function
extended	2	-	-		Yes	Yes	AK373122	HC	2	0	0	Signal transduction histidine kinase, subgroup 1, dimerisation/phosphoacceptor domain;GAF;Signal transduction response regulator, receiver domain;Signal transduction histidine kinase, core	IPR003661,IPR003018,IPR001789,IPR005467	PTHR24423,SM00388,SM00065,SM00448,PS50110,PF01590,PF00072,PS50109	GO:0016020	GO:0000155	GO:0007165	GO:0005515	GO:0006355	GO:0000156	GO:0000160	GO:0018106	GO:0004673	GO:0000155	GO:0007165						GO:0019001	name: guanyl nucleotide binding	namespace: molecular_function
extended	2	-	-		Yes	Yes	MLOC_12524.2	HC	2	0	0	-	-	-	-																GO:0050660	name: flavin adenine dinucleotide binding	namespace: molecular_function
extended	2	-	-		Yes	Yes	MLOC_22072.1	HC	2	0	0	NB-ARC	IPR002182	PF00931	GO:0006915	GO:0005524															GO:0004096	name: catalase activity	namespace: molecular_function
extended	2	-	-		Yes	Yes	MLOC_22073.1	LC	2	0	0	-	-	-	-																GO:0006952	name: defense response	namespace: biological_process
extended	2	-	-		Yes	Yes	MLOC_22074.1	LC	2	0	0	-	-	-	-																GO:0050832	name: defense response to fungus	namespace: biological_process
extended	2	-	-		Yes	Yes	MLOC_388.2	HC	2	0	0	-	-	-	-																GO:0004568	name: chitinase activity	namespace: molecular_function
extended	2	-	-		Yes	Yes	MLOC_64195.14	HC	2	0	0	Polycomb protein, VEFS-Box	IPR019135	PF09733																	GO:0004601	name: peroxidase activity	namespace: molecular_function
extended	2	-	-		Yes	Yes	MLOC_78623.1	LC	2	0	0	-	-	-	-																GO:0005777	name: peroxisome	namespace: cellular_component
extended	2	-	-		Yes	Yes	AK249371.1	HC	2	0	737800	-	-	-	-																GO:0006950	name: response to stress	namespace: biological_process
extended	2	-	-		Yes	Yes	AK357453	LC	2	0	737800	-	-	-	-																GO:0006979	name: response to oxidative stress	namespace: biological_process
extended	2	-	-		Yes	Yes	AK366112	HC	2	0	737800	Zinc finger, C2H2-like;Polycomb protein, VEFS-Box	IPR015880,IPR019135	SM00355,PF09733,PTHR22597	GO:0005622	GO:0008270															GO:0007186	name: G-protein coupled receptor signaling pathway	namespace: biological_process
extended	2	-	-		Yes	Yes	AK376324	HC	2	0	737800	Homeobox	IPR001356	SM00389,PS50071	GO:0003700	GO:0043565	GO:0006355														GO:0007205	name: protein kinase C-activating G-protein coupled receptor signaling pathway	namespace: biological_process
extended	2	-	-		Yes	Yes	MLOC_70916.2	HC	2	0	737800	-	-	-	-																GO:0008020	name: G-protein coupled photoreceptor activity	namespace: molecular_function
extended	2	-	-		Yes	Yes	AK250660.1	HC	2	0	1370200	-	-	-	-																GO:0008262	name: nuclear export signal receptor activity	namespace: molecular_function
extended	2	-	-		Yes	Yes	AK362635	HC	2	0	1370200	Post-SET domain;Zinc finger, CW-type;SET domain;AWS	IPR003616,IPR011124,IPR001214,IPR006560	PS50868,PS51050,PS50280,PTHR22884:SF123,SM00317,SM00570,SM00508,PF00856,PS51215,PTHR22884,PF07496	GO:0008270	GO:0005515	GO:0018024	GO:0005634													GO:0004970	name: ionotropic glutamate receptor activity	namespace: molecular_function
extended	2	-	-		Yes	Yes	MLOC_50056.1	LC	2	0	1370200	-	-	-	-																GO:0016998	name: cell wall macromolecule catabolic process	namespace: biological_process
extended	2	-	-		Yes	Yes	AK374116	HC	2	0.76	1370200	-	-	-	-																GO:0005618	name: cell wall	namespace: cellular_component
extended	2	-	-		Yes	Yes	MLOC_14496.1	LC	2	0.76	1370200	-	-	-	-																GO:0042545	name: cell wall modification	namespace: biological_process
extended	2	-	-		Yes	Yes	AK356424	HC	2	1.13	1370200	Aldo/keto reductase subgroup;Aldo/keto reductase, conserved site;Aldo/keto reductase;NADP-dependent oxidoreductase domain	IPR020471,IPR018170,IPR001395,IPR023210	PR00069,PS00062,PTHR11732,PTHR11732:SF34,PF00248,PS00063	GO:0016491	GO:0055114	GO:0055114	GO:0016491													GO:0042546	name: cell wall biogenesis	namespace: biological_process
extended	2	-	-		Yes	Yes	AK366661	HC	2	1.13	1370200	Cytochrome P450;Cytochrome P450, E-class, group I;Cytochrome P450, conserved site	IPR001128,IPR002401,IPR017972	PF00067,PTHR24296,PR00463,PR00385,PS00086	GO:0016705	GO:0055114	GO:0005506	GO:0009055	GO:0020037	GO:0016705	GO:0055114	GO:0005506	GO:0020037	GO:0016705	GO:0055114						GO:0008219	name: cell death	namespace: biological_process
extended	2	-	-		Yes	Yes	AK371259	HC	2	1.13	1370200	Lipase, GDSL	IPR001087	PTHR22835,PF00657,PTHR22835:SF39	GO:0016788	GO:0006629															GO:0005035	name: death receptor activity	namespace: molecular_function
extended	2	-	-		Yes	Yes	MLOC_23781.1	HC	2	1.13	1370200	-	-	-	-																GO:0005037	name: obsolete death receptor adaptor protein activity	namespace: molecular_function
extended	2	-	-		Yes	Yes	MLOC_24729.1	HC	2	1.13	1370200	NB-ARC	IPR002182	PF00931	GO:0006915	GO:0005524															GO:0005038	name: obsolete death receptor interacting protein activity	namespace: molecular_function
extended	2	-	-		Yes	Yes	MLOC_34382.5	HC	2	1.13	1370200	-	-	-	-																GO:0005039	name: obsolete death receptor-associated factor activity	namespace: molecular_function
extended	2	-	-		Yes	Yes	MLOC_34383.1	LC	2	1.13	1370200	-	-	-	-																GO:0005040	name: decoy death receptor activity	namespace: molecular_function
extended	2	-	-		Yes	Yes	MLOC_48053.1	LC	2	1.13	1370200	-	-	-	-																GO:0005123	name: death receptor binding	namespace: molecular_function
extended	2	-	-		Yes	Yes	MLOC_50732.1	LC	2	1.13	1370200	-	-	-	-																GO:0010343	name: singlet oxygen-mediated programmed cell death	namespace: biological_process
extended	2	-	-		Yes	Yes	MLOC_59351.4	HC	2	1.13	1370200	-	-	-	-																GO:0010421	name: hydrogen peroxide-mediated programmed cell death	namespace: biological_process
extended	2	-	-		Yes	Yes	MLOC_80142.1	HC	2	1.13	1370200	NB-ARC	IPR002182	PF00931	GO:0006915	GO:0005524															GO:0010623	name: programmed cell death involved in cell development	namespace: biological_process
extended	2	-	-		Yes	Yes	AK373631	HC	2	1.51	1370200	YTH domain	IPR007275	PS50882,PTHR12357:SF6,PF04146,PTHR12357																	GO:0010940	name: positive regulation of necrotic cell death	namespace: biological_process
extended	2	-	-		Yes	Yes	MLOC_44819.1	LC	2	1.66	1370200	-	-	-	-																GO:0010941	name: regulation of cell death	namespace: biological_process
extended	2	-	-		Yes	Yes	MLOC_53605.1	HC	2	1.7	1370200	Cytochrome P450	IPR001128	PF00067	GO:0016705	GO:0055114	GO:0005506	GO:0009055	GO:0020037												GO:0010942	name: positive regulation of cell death	namespace: biological_process
extended	2	-	-		Yes	Yes	AK371457	HC	2	1.98	1370200	-	-	-	-																GO:0012501	name: programmed cell death	namespace: biological_process
extended	2	-	-		Yes	Yes	AK373499	HC	2	2.12	1501640	Cytochrome P450, conserved site;Cytochrome P450, E-class, group I;Cytochrome P450	IPR017972,IPR002401,IPR001128	PTHR24282,PS00086,PTHR24282:SF174,PR00463,PF00067,PR00385	GO:0016705	GO:0055114	GO:0016705	GO:0055114	GO:0005506	GO:0020037	GO:0016705	GO:0055114	GO:0005506	GO:0009055	GO:0020037						GO:0012502	name: induction of programmed cell death	namespace: biological_process
extended	2	-	-		Yes	Yes	MLOC_1192.1	HC	2	2.12	1501640	NB-ARC	IPR002182	PF00931	GO:0006915	GO:0005524															GO:0016265	name: obsolete death	namespace: biological_process
extended	2	-	-		Yes	Yes	MLOC_20000.1	LC	2	2.12	1501640	-	-	-	-																GO:0012501	name: programmed cell death	namespace: biological_process
extended	2	-	-		Yes	Yes	MLOC_68584.1	LC	2	2.12	1501640	-	-	-	-																GO:0006915	name: apoptotic process	namespace: biological_process
extended	2	-	-		Yes	Yes	MLOC_70615.2	LC	2	2.12	1501640	-	-	-	-																GO:0005524	name: ATP binding	namespace: molecular_function
extended	2	-	-		Yes	Yes	MLOC_75899.2	HC	2	2.12	1501640	Protein of unknown function DUF1644	IPR012866	PF07800																	GO:0004672	name: protein kinase activity	namespace: molecular_function
extended	2	-	-		Yes	Yes	MLOC_75901.1	LC	2	2.12	1501640	-	-	-	-																GO:0005515	protein binding	molecular function
extended	2	-	-		Yes	Yes	MLOC_78185.1	LC	2	2.12	1501640	-	-	-	-
alignment	2	2.27	3660480	2768976	No	No	AK375690	HC	2	2.27	1501640	Chalcone/stilbene synthase, N-terminal;Chalcone/stilbene synthase, C-terminal	IPR001099,IPR012328	PTHR11877,PTHR11877:SF9,PF00195,PF02797	GO:0009058	GO:0008415	GO:0008415
alignment	2	2.27	3660480		No	No	MLOC_13397.1	HC	2	2.27	1501640	Alpha/beta hydrolase fold-3	IPR013094	PF07859,PTHR23024:SF10,PTHR23024	GO:0016787	GO:0008152
alignment	2	2.27	3660480		No	No	MLOC_76556.1	HC	2	2.27	1582240	EGF calcium-binding;Serine/threonine-protein kinase-like domain	IPR013091,IPR017442	PF07645,PF00069	GO:0006468	GO:0005524	GO:0004672
alignment	2	2.27	3660480		No	No	AK252222.1	HC	2	2.27	3660480	VHS;GAT	IPR002014,IPR004152	PF00790,PF03127	GO:0006886	GO:0005622	GO:0006886
alignment	2	2.27	3660480		No	No	AK353872	HC	2	2.27	3660480	Peptidyl-prolyl cis-trans isomerase, PpiC-type;Peptidyl-prolyl cis-trans isomerase, PpiC-type, conserved site	IPR000297,IPR023058	PS50198,PS01096,PTHR10657,PF00639	GO:0016853
alignment	2	2.27	3660480		No	No	AK354853	HC	2	2.27	3660480	DNA-binding WRKY	IPR003657	PF03106	GO:0003700	GO:0006355	GO:0043565
alignment	2	2.27	3660480		No	No	AK358163	HC	2	2.27	3660480	UDP-glucuronosyl/UDP-glucosyltransferase;Glycosyl transferase, family 28	IPR002213,IPR004276	PF00201,PF03033	GO:0016758	GO:0008152	GO:0005975	GO:0030259	GO:0016758
alignment	2	2.27	3660480		No	No	AK362062	HC	2	2.27	3660480	Sec23/Sec24, trunk domain;Zinc finger, Sec23/Sec24-type	IPR006896,IPR006895	PF04811,PTHR13803,PF04810	GO:0030127	GO:0006888	GO:0006886	GO:0006886	GO:0008270	GO:0006888	GO:0030127
alignment	2	2.27	3660480		No	No	AK364110	HC	2	2.27	3660480	Dehydrogenase, E1 component	IPR001017	PTHR11516:SF5,PF00676,PTHR11516	GO:0008152	GO:0016624
alignment	2	2.27	3660480		No	No	AK364489	HC	2	2.27	3660480	Flavin monooxygenase-like	IPR020946	PF00743	GO:0050661	GO:0004499	GO:0055114	GO:0050660
alignment	2	2.27	3660480		No	No	AK370117	HC	2	2.27	3660480	Hexokinase;Hexokinase, C-terminal;Hexokinase, N-terminal;Hexokinase, conserved site	IPR001312,IPR022673,IPR022672,IPR019807	PR00475,PF03727,PF00349,PTHR19443,PS00378	GO:0005524	GO:0005975	GO:0016773	GO:0005975	GO:0005524	GO:0016773	GO:0006096	GO:0004396	GO:0005524
alignment	2	2.27	3660480		No	No	AK372556	HC	2	2.27	3660480	3'-5' exonuclease	IPR002562	PTHR13620,PF01612	GO:0005622	GO:0006139	GO:0008408	GO:0003676
alignment	2	2.27	3660480		No	No	MLOC_13714.1	HC	2	2.27	3660480	Cytochrome P450	IPR001128	PF00067	GO:0016705	GO:0055114	GO:0005506	GO:0009055	GO:0020037
alignment	2	2.27	3660480		No	No	MLOC_15160.1	HC	2	2.27	3660480	Cytochrome P450	IPR001128	PF00067	GO:0016705	GO:0055114	GO:0005506	GO:0009055	GO:0020037
alignment	2	2.27	3660480		No	No	MLOC_15511.2	HC	2	2.27	3660480	Cytochrome P450	IPR001128	PF00067	GO:0016705	GO:0055114	GO:0005506	GO:0009055	GO:0020037
alignment	2	2.27	3660480		No	No	MLOC_16105.2	HC	2	2.27	3660480	Oligopeptide transporter	IPR000109	PF00854	GO:0016020	GO:0006857	GO:0005215
alignment	2	2.27	3660480		No	No	MLOC_17783.2	HC	2	2.27	3660480	Serpin domain	IPR023796	PF00079
alignment	2	2.27	3660480		No	No	MLOC_18921.1	LC	2	2.27	3660480	-	-	-	-
alignment	2	2.27	3660480		No	No	MLOC_19326.1	HC	2	2.27	3660480	-	-	-	-
alignment	2	2.27	3660480		No	No	MLOC_20970.1	HC	2	2.27	3660480	Transcriptional factor B3	IPR003340	PF02362	GO:0006355	GO:0003677
alignment	2	2.27	3660480		No	No	MLOC_36658.1	LC	2	2.27	3660480	-	-	-	-
alignment	2	2.27	3660480		No	No	MLOC_3720.1	HC	2	2.27	3660480	-	-	-	-
alignment	2	2.27	3660480		No	No	MLOC_43901.1	HC	2	2.27	3660480	-	-	-	-
alignment	2	2.27	3660480		No	No	MLOC_44743.2	HC	2	2.27	3660480	NB-ARC	IPR002182	PF00931	GO:0006915	GO:0005524
alignment	2	2.27	3660480		No	No	MLOC_51172.1	HC	2	2.27	3660480	Uncharacterised protein family UPF0546	IPR018908	PF10639
alignment	2	2.27	3660480		No	No	MLOC_54117.1	HC	2	2.27	3660480	tRNA-dihydrouridine synthase	IPR001269	PF01207	GO:0008033	GO:0050660	GO:0055114	GO:0017150
alignment	2	2.27	3660480		No	No	MLOC_54975.1	HC	2	2.27	3660480	Leucine-rich repeat;Leucine-rich repeat-containing N-terminal, type 2;Serine/threonine-protein kinase-like domain	IPR001611,IPR013210,IPR017442	PF00560,PF08263,PF00069	GO:0005515	GO:0006468	GO:0005524	GO:0004672
alignment	2	2.27	3660480		No	No	MLOC_56681.1	HC	2	2.27	3660480	Berberine/berberine-like;FAD linked oxidase, N-terminal	IPR012951,IPR006094	PF08031,PF01565	GO:0016491	GO:0055114	GO:0050660	GO:0008762	GO:0055114	GO:0016491	GO:0050660
alignment	2	2.27	3660480		No	No	MLOC_58838.5	HC	2	2.27	3660480	D111/G-patch	IPR000467	PF01585	GO:0005622	GO:0003676
alignment	2	2.27	3660480		No	No	MLOC_62638.1	HC	2	2.27	3660480	-	-	-	-
alignment	2	2.27	3660480		No	No	MLOC_63803.1	HC	2	2.27	3660480	Cytochrome P450	IPR001128	PF00067	GO:0016705	GO:0055114	GO:0005506	GO:0009055	GO:0020037
alignment	2	2.27	3660480		No	No	MLOC_64065.2	LC	2	2.27	3660480	-	-	-	-
alignment	2	2.27	3660480		No	No	MLOC_65428.1	HC	2	2.27	3660480	-	-	-	-
alignment	2	2.27	3660480		No	No	MLOC_65429.1	HC	2	2.27	3660480	-	-	-	-
alignment	2	2.27	3660480		No	No	MLOC_66846.1	HC	2	2.27	3660480	-	-	-	-
alignment	2	2.27	3660480		No	No	MLOC_6785.1	HC	2	2.27	3660480	ABC transporter, transmembrane domain;ABC transporter-like	IPR001140,IPR003439	PF00664,PF00005	GO:0016021	GO:0055085	GO:0006810	GO:0005524	GO:0042626	GO:0016887	GO:0005524
alignment	2	2.27	3660480		No	No	MLOC_68129.3	HC	2	2.27	3660480	NB-ARC	IPR002182	PF00931	GO:0006915	GO:0005524
alignment	2	2.27	3660480		No	No	MLOC_70623.1	HC	2	2.27	3660480	Late embryogenesis abundant protein, LEA-14	IPR004864	PF03168
alignment	2	2.27	3660480		No	No	MLOC_77140.1	HC	2	2.27	3660480	-	-	-	-
alignment	2	2.27	3660480		No	No	MLOC_9912.1	HC	2	2.27	3660480	Cytochrome P450	IPR001128	PF00067	GO:0016705	GO:0055114	GO:0005506	GO:0009055	GO:0020037
alignment	2	2.27	3660480		No	No	MLOC_9979.1	HC	2	2.27	3660480	Leucine-rich repeat;Serine/threonine-protein kinase-like domain	IPR001611,IPR017442	PF00560,PF00069	GO:0005515	GO:0006468	GO:0005524	GO:0004672
alignment	2	2.27	3660480		No	No	AK249799.1	HC	2	2.27	4051080	Carbohydrate/purine kinase	IPR011611	PF00294
alignment	2	2.27	3660480		No	No	AK372445	HC	2	2.27	4051080	Cytochrome P450;Cytochrome P450, E-class, group IV;Cytochrome P450, conserved site	IPR001128,IPR002403,IPR017972	PR00385,PF00067,PTHR24286:SF21,PTHR24286,PR00465,PS00086	GO:0016705	GO:0055114	GO:0005506	GO:0009055	GO:0020037	GO:0020037	GO:0004497	GO:0016705	GO:0055114	GO:0005506	GO:0016705
alignment	2	2.27	3660480		No	No	AK373050	HC	2	2.27	4051080	A1 cistron-splicing factor, AAR2	IPR007946	PTHR12689,PF05282
alignment	2	2.27	3660480		No	No	MLOC_69210.1	LC	2	2.27	4051080	-	-	-	-
alignment	2	2.27	3660480		No	No	MLOC_69211.1	HC	2	2.27	4051080	-	-	-	-
alignment	2	2.27	3660480		No	No	MLOC_75134.1	HC	2	2.27	4051080	Cytochrome P450	IPR001128	PF00067	GO:0016705	GO:0055114	GO:0005506	GO:0009055	GO:0020037
extended	2	-	-		Yes	Yes	AK374476	HC	2	3.26	4051080	Cytochrome P450	IPR001128	PF00067	GO:0016705	GO:0055114	GO:0005506	GO:0009055	GO:0020037
extended	2	-	-		Yes	Yes	MLOC_3149.1	LC	2	3.33	4051080	-	-	-	-
extended	2	-	-		Yes	Yes	MLOC_50352.3	HC	2	3.65	4051080	-	-	-	-
extended	2	-	-		Yes	Yes	MLOC_50351.1	LC	2	3.65	4051080	-	-	-	-
extended	2	-	-		Yes	Yes	MLOC_3707.2	HC	2	3.82	4051080	Protein kinase, ATP binding site;Leucine-rich repeat;Leucine-rich repeat-containing N-terminal, type 2;Protein kinase, catalytic domain;Serine/threonine-protein kinase, active site;Serine/threonine-protein kinase-like domain	IPR017441,IPR001611,IPR013210,IPR000719,IPR008271,IPR017442	PS00107,PR00019,PS51450,PTHR24420,PF08263,PS50011,PS00108,PF00069,PF00560,PTHR24420:SF474	GO:0005524	GO:0005515	GO:0004672	GO:0006468	GO:0005524	GO:0006468	GO:0004674	GO:0006468	GO:0005524	GO:0004672
extended	2	-	-		Yes	Yes	MLOC_67672.4	LC	2	3.82	4051080	-	-	-	-
extended	2	-	-		Yes	Yes	MLOC_71974.1	HC	2	3.82	4051080	Cytochrome P450	IPR001128	PF00067	GO:0016705	GO:0055114	GO:0005506	GO:0009055	GO:0020037
extended	2	-	-		Yes	Yes	AK356172	HC	2	3.82	4824840	-	-	-	-
extended	2	-	-		Yes	Yes	AK369630	HC	2	3.82	4824840	Cystathionine beta-synthase, core	IPR000644	PF00571,PTHR11911,SM00116	GO:0005515
extended	2	-	-		Yes	Yes	MLOC_6767.1	HC	2	3.82	4824840	Multicopper oxidase, type 3;Multicopper oxidase, type 2;Multicopper oxidase, type 1;Multicopper oxidase, copper-binding site	IPR011707,IPR011706,IPR001117,IPR002355	PF07732,PF07731,PF00394,PTHR11709:SF9,PS00080,PTHR11709	GO:0005507	GO:0016491	GO:0005507	GO:0055114	GO:0055114	GO:0016491
extended	2	-	-		Yes	Yes	MLOC_69821.2	LC	2	3.82	4824840	-	-	-	-
extended	2	-	-		Yes	Yes	AK375167	HC	2	4.25	4824840	Pectate lyase/Amb allergen;AmbAllergen	IPR002022,IPR018082	PF00544,SM00656,PR00807
extended	2	-	-		Yes	Yes	MLOC_59630.2	LC	2	4.25	4824840	-	-	-	-
extended	2	-	-		Yes	Yes	AK356079	HC	2	4.25	5090200	Ubiquitin interacting motif;Zinc finger, LIM-type;Protein of unknown function DUF3633	IPR003903,IPR001781,IPR022087	PS50330,PF00412,SM00132,SM00726,PS00478,PTHR24209,PS50023,PF12315	GO:0008270
extended	2	-	-		Yes	Yes	MLOC_40063.2	HC	2	4.25	5090200	-	-	-	-
extended	2	-	-		Yes	Yes	MLOC_4317.1	HC	2	4.25	5090200	Serine/threonine-protein kinase-like domain;PAN-2 domain;Bulb-type lectin domain;S-locus glycoprotein	IPR017442,IPR013227,IPR001480,IPR000858	PF00069,PF08276,PF01453,PF00954	GO:0006468	GO:0005524	GO:0004672	GO:0005529	GO:0048544
extended	2	-	-		Yes	Yes	MLOC_58142.1	HC	2	4.32	5090200	Transcription factor, TCP	IPR005333	PF03634
extended	2	-	-		Yes	Yes	MLOC_30830.1	LC	2	4.39	5508080	-	-	-	-
extended	2	-	-		Yes	Yes	MLOC_34476.1	HC	2	4.39	5508080	-	-	-	-
extended	2	-	-		Yes	Yes	MLOC_44237.1	HC	2	4.39	5508080	-	-	-	-
extended	2	-	-		Yes	Yes	MLOC_57169.1	HC	2	4.39	5508080	Methyl-CpG DNA binding	IPR001739	PF01429	GO:0005634	GO:0003677
extended	2	-	-		Yes	Yes	MLOC_76813.1	HC	2	4.39	5508080	Nucleoside phosphatase GDA1/CD39	IPR000407	PS01238,PF01150,PTHR11782:SF8,PTHR11782	GO:0016787
extended	2	-	-		Yes	Yes	MLOC_41629.1	LC	2	4.39	5706480	-	-	-	-
extended	2	-	-		Yes	Yes	MLOC_23395.1	HC	2	4.53	5706480	-	-	-	-
extended	2	-	-		Yes	Yes	MLOC_10286.1	HC	2	4.89	5706480	-	-	-	-
extended	2	-	-		Yes	Yes	MLOC_10287.1	LC	2	4.89	5706480	-	-	-	-
extended	2	-	-		Yes	Yes	MLOC_18030.1	HC	2	4.92	5706480	Serine/threonine-protein kinase-like domain;Serine/threonine-protein kinase, active site;Protein kinase, ATP binding site;Protein kinase, catalytic domain	IPR017442,IPR008271,IPR017441,IPR000719	PF00069,PS00108,PS00107,PTHR24420,PS50011	GO:0006468	GO:0005524	GO:0004672	GO:0006468	GO:0004674	GO:0005524	GO:0004672	GO:0006468	GO:0005524
extended	2	-	-		Yes	Yes	AK374934	HC	2	5.38	5706480	DNA glycosylase/AP lyase, catalytic domain;DNA glycosylase/AP lyase, H2TH DNA-binding	IPR012319,IPR015886	PF01149,PF06831	GO:0008270	GO:0016799	GO:0006284	GO:0003684	GO:0003906	GO:0016799	GO:0008270	GO:0006289	GO:0003684	GO:0003906
extended	2	-	-		Yes	Yes	MLOC_38245.1	LC	2	5.38	5706480	-	-	-	-
extended	2	-	-		Yes	Yes	MLOC_38246.2	LC	2	5.38	5706480	-	-	-	-
extended	2	-	-		Yes	Yes	MLOC_51471.1	LC	2	5.38	5706480	-	-	-	-
extended	2	-	-		Yes	Yes	AK372375	HC	2	5.38	6066080	Amidase	IPR000120	PF01425,PTHR11895:SF8,PTHR11895	GO:0016884
extended	2	-	-		Yes	Yes	MLOC_12651.1	LC	2	5.38	6066080	-	-	-	-
extended	2	-	-		Yes	Yes	MLOC_12652.1	LC	2	5.38	6066080	-	-	-	-
extended	2	-	-		Yes	Yes	MLOC_12653.2	HC	2	5.38	6066080	NB-ARC;Exo70 exocyst complex subunit	IPR002182,IPR004140	PF00931,PF03081	GO:0006915	GO:0005524	GO:0000145	GO:0006887
extended	2	-	-		Yes	Yes	MLOC_55294.2	HC	2	5.38	6066080	Amidase	IPR000120	PF01425	GO:0016884
extended	2	-	-		Yes	Yes	MLOC_55898.1	LC	2	5.38	6066080	-	-	-	-
extended	2	-	-		Yes	Yes	MLOC_55899.1	LC	2	5.38	6066080	-	-	-	-
extended	2	-	-		Yes	Yes	MLOC_55900.1	LC	2	5.38	6066080	-	-	-	-
extended	2	-	-		Yes	Yes	MLOC_59392.2	LC	2	5.38	6066080	-	-	-	-
extended	2	-	-		Yes	Yes	MLOC_70267.1	LC	2	5.38	6066080	-	-	-	-
extended	2	-	-		Yes	Yes	MLOC_37603.1	HC	2	5.38	6335160	Protein of unknown function DUF594	IPR007658	PF04578
extended	2	-	-		Yes	Yes	MLOC_70002.1	HC	2	5.38	6335160	-	-	-	-
extended	2	-	-		Yes	Yes	MLOC_71372.1	HC	2	5.38	6335160	DNA replication factor CDT1-like	IPR014939	PF08839
extended	2	-	-		Yes	Yes	MLOC_76130.2	HC	2	5.38	6335160	Lipase, GDSL	IPR001087	PF00657	GO:0016788	GO:0006629
extended	2	-	-		Yes	Yes	AK365895	HC	2	5.38	6729480	Serine/threonine-protein kinase-like domain	IPR017442	PF00069	GO:0006468	GO:0005524	GO:0004672
extended	2	-	-		Yes	Yes	MLOC_15074.1	LC	2	5.38	6729480	-	-	-	-
extended	2	-	-		Yes	Yes	MLOC_17186.1	LC	2	5.38	6729480	-	-	-	-
extended	2	-	-		Yes	Yes	MLOC_52562.1	HC	2	5.38	6729480	Serine-threonine/tyrosine-protein kinase	IPR001245	PF07714	GO:0004672	GO:0006468
extended	2	-	-		Yes	Yes	MLOC_58632.3	HC	2	5.38	6729480	Cytochrome P450	IPR001128	PF00067	GO:0016705	GO:0055114	GO:0005506	GO:0009055	GO:0020037
extended	2	-	-		Yes	Yes	MLOC_62390.1	HC	2	5.38	6729480	Terpene synthase-like;Terpene synthase, metal-binding domain	IPR001906,IPR005630	PF01397,PF03936	GO:0016829	GO:0008152	GO:0016829	GO:0000287
extended	2	-	-		Yes	Yes	MLOC_37759.1	HC	2	5.42	6729480	-	-	-	-
extended	2	-	-		Yes	Yes	AK371559	HC	2	5.52	6729480	Amidase	IPR000120	PTHR11895,PF01425,PTHR11895:SF8	GO:0016884
extended	2	-	-		Yes	Yes	MLOC_3664.1	HC	2	5.52	6729480	Serine/threonine-protein kinase-like domain	IPR017442	PF00069	GO:0006468	GO:0005524	GO:0004672
extended	2	-	-		Yes	Yes	MLOC_67659.1	LC	2	5.52	6729480	-	-	-	-
extended	2	-	-		Yes	Yes	AK356235	HC	2	5.84	7125040	-	-	-	-
extended	2	-	-		Yes	Yes	MLOC_10425.2	HC	2	5.84	7125040	NB-ARC	IPR002182	PF00931	GO:0006915	GO:0005524
extended	2	-	-		Yes	Yes	MLOC_66581.3	HC	2	5.84	7125040	NB-ARC	IPR002182	PF00931	GO:0006915	GO:0005524
aMarker located in the extended ±4cM intervall (extended), position of best sequence alignment (alignment)

## Sheet: Qps.2H-2
Supporting Information 2 | Alignment of markers with DR >50% using BARLEYMAP
Markera	Chr	cM	Base pairs	barlex_pos_bp	Multiple positions	Other alignments	Gene	HC/LC	Chr	cM	Bp	Description	InterPro	Signatures	GO terms									total of relevant GO terms:
extended	2	-	-		Yes	Yes	AK375014	HC	2	13.53	17389760	Peptidase aspartic, active site;Peptidase A1	IPR001969,IPR001461	PS00141,PF00026,PTHR13683:SF98,PTHR13683,PR00792	GO:0004190	GO:0006508	GO:0006508	GO:0004190
extended	2	-	-		Yes	Yes	MLOC_63016.2	HC	2	13.53	17389760	-	-	-	-																GO:0000166	name: nucleotide binding	namespace: molecular_function
extended	2	-	-		Yes	Yes	AK356951	HC	2	13.56	17389760	Ribulose bisphosphate carboxylase, small chain	IPR000894	PR00152,PF12338,PF00101	GO:0015977	GO:0016984															GO:0019001	name: guanyl nucleotide binding	namespace: molecular_function
extended	2	-	-		Yes	Yes	MLOC_56366.3	HC	2	13.74	17389760	-	-	-	-																GO:0050660	name: flavin adenine dinucleotide binding	namespace: molecular_function
extended	2	-	-		Yes	Yes	MLOC_56367.1	HC	2	13.74	17389760	Ribosomal protein S6e, conserved site;Ribosomal protein S6e	IPR018282,IPR001377	PS00578,PF01092,PTHR11502	GO:0005622	GO:0006412	GO:0003735	GO:0005840	GO:0006412	GO:0003735	GO:0005622	GO:0005840									GO:0004096	name: catalase activity	namespace: molecular_function
extended	2	-	-		Yes	Yes	MLOC_65574.1	HC	2	13.9	17389760	NB-ARC	IPR002182	PF00931	GO:0006915	GO:0005524															GO:0006952	name: defense response	namespace: biological_process
extended	2	-	-		Yes	Yes	AK251031.1	HC	2	14.38	17389760	Pollen Ole e 1 allergen/extensin	IPR006041	PF01190																	GO:0050832	name: defense response to fungus	namespace: biological_process
extended	2	-	-		Yes	Yes	MLOC_15817.1	LC	2	14.38	17389760	-	-	-	-																GO:0004568	name: chitinase activity	namespace: molecular_function
extended	2	-	-		Yes	Yes	MLOC_53661.1	LC	2	14.38	17389760	-	-	-	-																GO:0004601	name: peroxidase activity	namespace: molecular_function
extended	2	-	-		Yes	Yes	MLOC_76279.1	LC	2	14.38	17389760	-	-	-	-																GO:0005777	name: peroxisome	namespace: cellular_component
extended	2	-	-		Yes	Yes	AK253095.1	HC	2	14.38	18893880	Pollen Ole e 1 allergen/extensin	IPR006041	PF01190																	GO:0006950	name: response to stress	namespace: biological_process
extended	2	-	-		Yes	Yes	AK363518	HC	2	14.38	18893880	Alcohol dehydrogenase, zinc-type, conserved site;Alcohol dehydrogenase superfamily, zinc-type;Alcohol dehydrogenase, C-terminal;Alcohol dehydrogenase GroES-like	IPR002328,IPR002085,IPR013149,IPR013154	PS00059,PTHR11695,PTHR11695:SF285,PF00107,PF08240	GO:0016491	GO:0055114	GO:0008270	GO:0008270	GO:0016491	GO:0055114	GO:0008270	GO:0055114	GO:0016491	GO:0055114	GO:0016491						GO:0006979	name: response to oxidative stress	namespace: biological_process
extended	2	-	-		Yes	Yes	AK368044	HC	2	14.38	18893880	Transferase	IPR003480	PF02458	GO:0016747																GO:0007186	name: G-protein coupled receptor signaling pathway	namespace: biological_process
extended	2	-	-		Yes	Yes	AK369309	HC	2	14.38	18893880	HECT	IPR000569	PF00632	GO:0005622	GO:0016881	GO:0006464														GO:0007205	name: protein kinase C-activating G-protein coupled receptor signaling pathway	namespace: biological_process
extended	2	-	-		Yes	Yes	AK373333	HC	2	14.38	18893880	Glutaredoxin active site;Glutaredoxin;Glutathione S-transferase, C-terminal	IPR011767,IPR002109,IPR004046	PS00195,PF00462,PTHR12782,PS51354,PF00043	GO:0045454	GO:0009055	GO:0009055	GO:0015035	GO:0045454												GO:0008020	name: G-protein coupled photoreceptor activity	namespace: molecular_function
extended	2	-	-		Yes	Yes	AK375669	HC	2	14.38	18893880	Protease-associated domain, PA;Zinc finger, C3HC4 RING-type;Zinc finger, RING-type	IPR003137,IPR018957,IPR001841	PF02225,PTHR22765,PF00097,SM00184,PTHR22765:SF20,PS50089	GO:0008270	GO:0005515															GO:0008262	name: nuclear export signal receptor activity	namespace: molecular_function
extended	2	-	-		Yes	Yes	MLOC_37479.1	HC	2	14.38	18893880	Oxoglutarate/iron-dependent oxygenase	IPR005123	PF03171	GO:0016706	GO:0016491	GO:0055114														GO:0004970	name: ionotropic glutamate receptor activity	namespace: molecular_function
extended	2	-	-		Yes	Yes	MLOC_4541.1	HC	2	14.38	18893880	AUX/IAA protein;Leucine-rich repeat;NB-ARC	IPR003311,IPR001611,IPR002182	PF02309,PF00560,PF00931	GO:0006355	GO:0005634	GO:0005515	GO:0006915	GO:0005524												GO:0016998	name: cell wall macromolecule catabolic process	namespace: biological_process
extended	2	-	-		Yes	Yes	MLOC_56278.2	HC	2	14.38	18893880	Major intrinsic protein	IPR000425	PF00230	GO:0006810	GO:0005215	GO:0016020														GO:0005618	name: cell wall	namespace: cellular_component
extended	2	-	-		Yes	Yes	MLOC_56660.1	HC	2	14.38	18893880	Heavy metal-associated domain, HMA	IPR006121	PTHR22814:SF26,PF00403,PS50846,PTHR22814	GO:0046872	GO:0030001															GO:0042545	name: cell wall modification	namespace: biological_process
extended	2	-	-		Yes	Yes	MLOC_60079.1	HC	2	14.38	18893880	No apical meristem (NAM) protein	IPR003441	PF02365	GO:0006355	GO:0003677															GO:0042546	name: cell wall biogenesis	namespace: biological_process
extended	2	-	-		Yes	Yes	MLOC_69072.2	HC	2	14.38	18893880	-	-	-	-																GO:0008219	name: cell death	namespace: biological_process
extended	2	-	-		Yes	Yes	MLOC_70154.1	HC	2	14.38	18893880	Myb, DNA-binding	IPR014778	PF00249																	GO:0005035	name: death receptor activity	namespace: molecular_function
extended	2	-	-		Yes	Yes	AK369971	HC	2	14.52	18893880	NB-ARC;Disease resistance protein	IPR002182,IPR000767	PTHR23155:SF268,PTHR23155,PF00931,PR00364	GO:0006915	GO:0005524	GO:0006952														GO:0005037	name: obsolete death receptor adaptor protein activity	namespace: molecular_function
extended	2	-	-		Yes	Yes	MLOC_8024.1	LC	2	15.37	18893880	-	-	-	-																GO:0005038	name: obsolete death receptor interacting protein activity	namespace: molecular_function
extended	2	-	-		Yes	Yes	MLOC_49643.1	LC	2	15.4	18893880	-	-	-	-																GO:0005039	name: obsolete death receptor-associated factor activity	namespace: molecular_function
extended	2	-	-		Yes	Yes	AK355444	HC	2	15.44	19439480	Pentatricopeptide repeat	IPR002885	PS51375,PTHR24015,PF01535																	GO:0005040	name: decoy death receptor activity	namespace: molecular_function
extended	2	-	-		Yes	Yes	AK359091	HC	2	15.44	19439480	Pollen Ole e 1 allergen/extensin	IPR006041	PF01190																	GO:0005123	name: death receptor binding	namespace: molecular_function
extended	2	-	-		Yes	Yes	AK367617	HC	2	15.44	19439480	F-box domain, cyclin-like	IPR001810	PF00646,PS50181	GO:0005515																GO:0010343	name: singlet oxygen-mediated programmed cell death	namespace: biological_process
extended	2	-	-		Yes	Yes	AK376312	HC	2	15.44	19439480	Sec1-like protein	IPR001619	PTHR11679,PF00995,PTHR11679:SF5	GO:0006904	GO:0016192															GO:0010421	name: hydrogen peroxide-mediated programmed cell death	namespace: biological_process
extended	2	-	-		Yes	Yes	MLOC_12182.1	HC	2	15.44	19439480	-	-	-	-																GO:0010623	name: programmed cell death involved in cell development	namespace: biological_process
extended	2	-	-		Yes	Yes	MLOC_34868.1	HC	2	15.44	19439480	-	-	-	-																GO:0010940	name: positive regulation of necrotic cell death	namespace: biological_process
extended	2	-	-		Yes	Yes	MLOC_4350.2	HC	2	15.44	19439480	Cleavage/polyadenylation specificity factor, A subunit, C-terminal	IPR004871	PF03178	GO:0005634	GO:0003676															GO:0010941	name: regulation of cell death	namespace: biological_process
extended	2	-	-		Yes	Yes	MLOC_58466.1	HC	2	15.44	19439480	WD40 repeat, subgroup	IPR019781	PF00400																	GO:0010942	name: positive regulation of cell death	namespace: biological_process
extended	2	-	-		Yes	Yes	MLOC_58886.1	HC	2	15.44	19439480	Oxoglutarate/iron-dependent oxygenase	IPR005123	PF03171	GO:0016706	GO:0016491	GO:0055114														GO:0012501	name: programmed cell death	namespace: biological_process
extended	2	-	-		Yes	Yes	MLOC_59732.2	HC	2	15.44	19439480	-	-	-	-																GO:0012502	name: induction of programmed cell death	namespace: biological_process
extended	2	-	-		Yes	Yes	MLOC_59733.1	HC	2	15.44	19439480	-	-	-	-																GO:0016265	name: obsolete death	namespace: biological_process
extended	2	-	-		Yes	Yes	MLOC_68321.1	HC	2	15.44	19439480	RNA recognition motif domain	IPR000504	PF00076	GO:0003676																GO:0012501	name: programmed cell death	namespace: biological_process
extended	2	-	-		Yes	Yes	AK250520.1	HC	2	15.44	19748240	Pollen Ole e 1 allergen/extensin	IPR006041	PF01190																	GO:0006915	name: apoptotic process	namespace: biological_process
extended	2	-	-		Yes	Yes	AK361824	HC	2	15.44	19748240	Ribosome-associated, YjgA	IPR006839	PF04751																	GO:0005524	name: ATP binding	namespace: molecular_function
extended	2	-	-		Yes	Yes	MLOC_38875.1	LC	2	15.44	19748240	-	-	-	-																GO:0004672	name: protein kinase activity	namespace: molecular_function
extended	2	-	-		Yes	Yes	MLOC_81869.1	HC	2	15.44	19748240	Cytochrome P450	IPR001128	PF00067	GO:0016705	GO:0055114	GO:0005506	GO:0009055	GO:0020037												GO:0005515	protein binding	molecular function
extended	2	-	-		Yes	Yes	MLOC_9701.1	HC	2	15.44	19748240	-	-	-	-
alignment	2	17.46	19924320	24866696	No	No	MLOC_55121.1	LC	2	17.46	19924320	-	-	-	-
extended	2	-	-		Yes	Yes	AK374891	HC	2	17.46	19924320	-	-	-	-
extended	2	-	-		Yes	Yes	MLOC_55120.1	HC	2	17.46	19924320	Cytochrome P450	IPR001128	PF00067	GO:0016705	GO:0055114	GO:0005506	GO:0009055	GO:0020037
extended	2	-	-		Yes	Yes	MLOC_60943.2	HC	2	17.99	19924320	Glycoside hydrolase, family 10	IPR001000	PF00331	GO:0004553	GO:0005975
extended	2	-	-		Yes	Yes	AK353640	HC	2	18.13	20550520	Sulfotransferase domain	IPR000863	PF00685,PTHR11783:SF1,PTHR11783	GO:0008146
extended	2	-	-		Yes	Yes	MLOC_55318.1	HC	2	18.13	20550520	NB-ARC	IPR002182	PF00931	GO:0006915	GO:0005524
extended	2	-	-		Yes	Yes	MLOC_6632.1	LC	2	18.13	20550520	-	-	-	-
extended	2	-	-		Yes	Yes	MLOC_6633.1	HC	2	18.13	20550520	NB-ARC	IPR002182	PF00931	GO:0006915	GO:0005524
extended	2	-	-		Yes	Yes	MLOC_6868.1	HC	2	18.13	20550520	-	-	-	-
extended	2	-	-		Yes	Yes	MLOC_4182.1	LC	2	18.57	20550520	-	-	-	-
extended	2	-	-		Yes	Yes	MLOC_4181.1	HC	2	18.57	20550520	Methyl-CpG DNA binding	IPR001739	PF01429	GO:0005634	GO:0003677
extended	2	-	-		Yes	Yes	MLOC_69166.1	LC	2	18.8	20550520	-	-	-	-
extended	2	-	-		Yes	Yes	MLOC_69167.1	LC	2	18.8	20550520	-	-	-	-
extended	2	-	-		Yes	Yes	MLOC_69168.1	LC	2	18.8	20550520	-	-	-	-
extended	2	-	-		Yes	Yes	AK355440	HC	2	18.91	22153840	Peptidase C65, otubain	IPR019400	PF10275,PTHR12931:SF14,PTHR12931
extended	2	-	-		Yes	Yes	AK358158	HC	2	18.91	22153840	Zinc finger, DHHC-type, palmitoyltransferase	IPR001594	PF01529,PS50216,PTHR22883	GO:0008270
extended	2	-	-		Yes	Yes	AK362271	HC	2	18.91	22153840	Lipoamide Acyltransferase;E3 binding;2-oxo acid dehydrogenase, lipoyl-binding site;2-oxoacid dehydrogenase acyltransferase, catalytic domain;Biotin/lipoyl attachment	IPR015761,IPR004167,IPR003016,IPR001078,IPR000089	PTHR23151,PTHR23151:SF11,PF02817,PS00189,PF00198,PS50968,PF00364	GO:0043754	GO:0048037	GO:0046949	GO:0008152	GO:0008415
extended	2	-	-		Yes	Yes	AK367074	HC	2	18.91	22153840	Cupin 1;Germin;Germin, manganese binding site	IPR006045,IPR001929,IPR019780	SM00835,PF00190,PR00325,PS00725	GO:0045735	GO:0030145	GO:0048046	GO:0030145
extended	2	-	-		Yes	Yes	AK368851	HC	2	18.91	22153840	Peptidase C65, otubain	IPR019400	PTHR12931:SF14,PTHR12931,PF10275
extended	2	-	-		Yes	Yes	MLOC_13087.1	LC	2	18.91	22153840	-	-	-	-
extended	2	-	-		Yes	Yes	MLOC_55452.1	HC	2	18.91	22153840	-	-	-	-
extended	2	-	-		Yes	Yes	MLOC_60987.1	HC	2	18.91	22153840	FBD	IPR013596	PF08387
extended	2	-	-		Yes	Yes	MLOC_62967.1	HC	2	18.91	22153840	Fatty acid desaturase, type 2	IPR005067	PF03405	GO:0006631	GO:0055114	GO:0045300
extended	2	-	-		Yes	Yes	MLOC_69091.1	HC	2	18.91	22153840	C2 calcium-dependent membrane targeting	IPR000008	PF00168	GO:0005515
extended	2	-	-		Yes	Yes	MLOC_70393.5	HC	2	18.91	22153840	Peptidase C65, otubain	IPR019400	PF10275
extended	2	-	-		Yes	Yes	AK361155	HC	2	18.91	22429120	Protein kinase, catalytic domain;Serine/threonine-protein kinase-like domain;Protein kinase, ATP binding site;Legume lectin, beta chain;Serine/threonine-protein kinase, active site	IPR000719,IPR017442,IPR017441,IPR001220,IPR008271	PS50011,PF00069,PS00107,PTHR24420:SF435,PF00139,PS00108,PTHR24420	GO:0004672	GO:0006468	GO:0005524	GO:0006468	GO:0005524	GO:0004672	GO:0005524	GO:0005488	GO:0006468	GO:0004674
extended	2	-	-		Yes	Yes	MLOC_18003.1	HC	2	18.91	22429120	-	-	-	-
extended	2	-	-		Yes	Yes	MLOC_22627.1	LC	2	18.91	22429120	-	-	-	-
extended	2	-	-		Yes	Yes	MLOC_37504.1	LC	2	18.91	22429120	-	-	-	-
extended	2	-	-		Yes	Yes	MLOC_37505.1	LC	2	18.91	22429120	-	-	-	-
extended	2	-	-		Yes	Yes	AK248149.1	HC	2	18.91	23124760	Domain of unknown function DUF231, plant	IPR004253	PF03005
extended	2	-	-		Yes	Yes	AK356149	HC	2	18.91	23124760	Cytochrome P450;Cytochrome P450, conserved site;Cytochrome P450, E-class, group I	IPR001128,IPR017972,IPR002401	PR00385,PS00086,PTHR25943:SF170,PTHR25943,PF00067,PR00463	GO:0016705	GO:0055114	GO:0005506	GO:0009055	GO:0020037	GO:0016705	GO:0055114	GO:0016705	GO:0055114	GO:0005506	GO:0020037
extended	2	-	-		Yes	Yes	AK371602	HC	2	18.91	23124760	NAD-dependent histone deacetylase, silent information regulator Sir2	IPR003000	PS50305,PTHR11085,PF02146	GO:0070403	GO:0006355	GO:0006476	GO:0008270	GO:0006342	GO:0016811
extended	2	-	-		Yes	Yes	AK374726	HC	2	18.91	23124760	NAD-dependent histone deacetylase, silent information regulator Sir2	IPR003000	PTHR11085,PS50305,PF02146	GO:0070403	GO:0006355	GO:0006476	GO:0008270	GO:0006342	GO:0016811
extended	2	-	-		Yes	Yes	AK375972	HC	2	18.91	23124760	L-lactate dehydrogenase, active site;Lactate/malate dehydrogenase, C-terminal;Lactate/malate dehydrogenase, N-terminal;L-lactate/malate dehydrogenase	IPR018177,IPR022383,IPR001236,IPR001557	PS00064,PF02866,PTHR11540,PF00056,PR00086	GO:0055114	GO:0004459	GO:0055114	GO:0016616	GO:0055114	GO:0016491	GO:0044262	GO:0016616	GO:0055114
extended	2	-	-		Yes	Yes	MLOC_20161.1	LC	2	18.91	23124760	-	-	-	-
extended	2	-	-		Yes	Yes	MLOC_294.1	LC	2	18.91	23124760	-	-	-	-
extended	2	-	-		Yes	Yes	MLOC_75303.1	LC	2	18.91	23124760	-	-	-	-
extended	2	-	-		Yes	Yes	AK353856	HC	2	18.98	23124760	Copper amine oxidase, C-terminal;Copper amine oxidase, N2-terminal;Copper amine oxidase;Copper amine oxidase, N3-terminal	IPR015798,IPR015800,IPR000269,IPR015802	PF01179,PF02727,PTHR10638,PF02728,PS01165,PTHR10638:SF12	GO:0048038	GO:0009308	GO:0005507	GO:0008131	GO:0055114	GO:0009308	GO:0008131	GO:0048038	GO:0005507	GO:0055114	GO:0009308	GO:0008131
extended	2	-	-		Yes	Yes	MLOC_16188.1	HC	2	19.44	23313240	-	-	-	-
extended	2	-	-		Yes	Yes	AK252297.1	HC	2	20.21	23313240	-	-	-	-
aMarker located in the extended ±4cM intervall (extended), position of best sequence alignment (alignment)

## Sheet: QPs.2H-3
Supporting Information 2 | Alignment of markers with DR >50% using BARLEYMAP
Markera	Chr	cM	Base pairs	barlex_pos_bp	Multiple positions	Other alignments	Gene	HC/LC	Chr	cM	Bp	Description	InterPro	Signatures	GO terms									total of relevant GO terms:
extended	2	-	-		Yes	Yes	AK252991.1	HC	2	104.16	570825320	RNA recognition motif domain	IPR000504	PF00076	GO:0003676
extended	2	-	-		Yes	Yes	MLOC_71337.1	HC	2	104.16	570825320	-	-	-	-																GO:0000166	name: nucleotide binding	namespace: molecular_function
extended	2	-	-		Yes	Yes	MLOC_71336.1	LC	2	104.16	570825320	-	-	-	-																GO:0019001	name: guanyl nucleotide binding	namespace: molecular_function
extended	2	-	-		Yes	Yes	MLOC_65889.5	HC	2	104.6	571768960	Zinc finger, PHD-finger	IPR019787	PF00628	GO:0005515																GO:0050660	name: flavin adenine dinucleotide binding	namespace: molecular_function
extended	2	-	-		Yes	Yes	MLOC_55553.2	HC	2	104.68	571768960	ATPase, P-type cation-transporter, C-terminal;Haloacid dehalogenase-like hydrolase	IPR006068,IPR005834	PF00689,PF00702	GO:0016020	GO:0006754	GO:0006812	GO:0015662	GO:0003824	GO:0008152											GO:0004096	name: catalase activity	namespace: molecular_function
extended	2	-	-		Yes	Yes	MLOC_37312.1	HC	2	105.4	571768960	Plastid lipid-associated protein/fibrillin conserved domain	IPR006843	PF04755	GO:0009507	GO:0005198															GO:0006952	name: defense response	namespace: biological_process
extended	2	-	-		Yes	Yes	MLOC_76802.2	HC	2	105.92	571768960	C1-like;Alkyl hydroperoxide reductase subunit C/ Thiol specific antioxidant	IPR011424,IPR000866	PF07649,PF00578	GO:0047134	GO:0055114	GO:0016491	GO:0016209	GO:0055114												GO:0050832	name: defense response to fungus	namespace: biological_process
extended	2	-	-		Yes	Yes	MLOC_35830.1	LC	2	105.92	571768960	-	-	-	-																GO:0004568	name: chitinase activity	namespace: molecular_function
extended	2	-	-		Yes	Yes	MLOC_76803.1	LC	2	105.92	571768960	-	-	-	-																GO:0004601	name: peroxidase activity	namespace: molecular_function
extended	2	-	-		Yes	Yes	MLOC_76804.1	LC	2	105.92	571768960	-	-	-	-																GO:0005777	name: peroxisome	namespace: cellular_component
extended	2	-	-		Yes	Yes	MLOC_64217.1	HC	2	106.44	571768960	Kelch repeat type 1	IPR006652	PF01344	GO:0005515																GO:0006950	name: response to stress	namespace: biological_process
extended	2	-	-		Yes	Yes	MLOC_64218.2	HC	2	106.44	571768960	Serine-threonine/tyrosine-protein kinase	IPR001245	PF07714	GO:0004672	GO:0006468															GO:0006979	name: response to oxidative stress	namespace: biological_process
extended	2	-	-		Yes	Yes	AK251496.1	HC	2	106.81	571768960	Golgi pH regulator, conserved domain	IPR022535	PF12430,PF12537																	GO:0007186	name: G-protein coupled receptor signaling pathway	namespace: biological_process
extended	2	-	-		Yes	Yes	MLOC_12972.1	LC	2	106.81	571768960	-	-	-	-																GO:0007205	name: protein kinase C-activating G-protein coupled receptor signaling pathway	namespace: biological_process
extended	2	-	-		Yes	Yes	MLOC_30882.2	LC	2	107.15	571768960	-	-	-	-																GO:0008020	name: G-protein coupled photoreceptor activity	namespace: molecular_function
extended	2	-	-		Yes	Yes	MLOC_14498.1	LC	2	107.15	574911120	-	-	-	-																GO:0008262	name: nuclear export signal receptor activity	namespace: molecular_function
extended	2	-	-		Yes	Yes	MLOC_19871.1	LC	2	107.15	574911120	-	-	-	-																GO:0004970	name: ionotropic glutamate receptor activity	namespace: molecular_function
extended	2	-	-		Yes	Yes	MLOC_69172.2	LC	2	107.15	574911120	-	-	-	-																GO:0016998	name: cell wall macromolecule catabolic process	namespace: biological_process
extended	2	-	-		Yes	Yes	MLOC_69173.2	LC	2	107.15	574911120	-	-	-	-																GO:0005618	name: cell wall	namespace: cellular_component
extended	2	-	-		Yes	Yes	MLOC_69174.1	LC	2	107.15	574911120	-	-	-	-																GO:0042545	name: cell wall modification	namespace: biological_process
extended	2	-	-		Yes	Yes	MLOC_11072.1	LC	2	107.15	576399120	-	-	-	-																GO:0042546	name: cell wall biogenesis	namespace: biological_process
extended	2	-	-		Yes	Yes	MLOC_38379.1	LC	2	107.15	576399120	-	-	-	-																GO:0008219	name: cell death	namespace: biological_process
extended	2	-	-		Yes	Yes	MLOC_69764.1	LC	2	107.15	576399120	-	-	-	-																GO:0005035	name: death receptor activity	namespace: molecular_function
extended	2	-	-		Yes	Yes	MLOC_17696.1	LC	2	107.15	577832560	-	-	-	-																GO:0005037	name: obsolete death receptor adaptor protein activity	namespace: molecular_function
extended	2	-	-		Yes	Yes	MLOC_10925.1	LC	2	107.15	578796040	-	-	-	-																GO:0005038	name: obsolete death receptor interacting protein activity	namespace: molecular_function
extended	2	-	-		Yes	Yes	MLOC_15157.1	LC	2	107.15	578796040	-	-	-	-																GO:0005039	name: obsolete death receptor-associated factor activity	namespace: molecular_function
extended	2	-	-		Yes	Yes	MLOC_22062.1	LC	2	107.15	578796040	-	-	-	-																GO:0005040	name: decoy death receptor activity	namespace: molecular_function
extended	2	-	-		Yes	Yes	MLOC_44590.1	LC	2	107.15	578796040	-	-	-	-																GO:0005123	name: death receptor binding	namespace: molecular_function
extended	2	-	-		Yes	Yes	MLOC_44591.1	LC	2	107.15	578796040	-	-	-	-																GO:0010343	name: singlet oxygen-mediated programmed cell death	namespace: biological_process
extended	2	-	-		Yes	Yes	MLOC_44592.1	LC	2	107.15	578796040	-	-	-	-																GO:0010421	name: hydrogen peroxide-mediated programmed cell death	namespace: biological_process
extended	2	-	-		Yes	Yes	MLOC_57554.5	LC	2	107.15	578796040	-	-	-	-																GO:0010623	name: programmed cell death involved in cell development	namespace: biological_process
extended	2	-	-		Yes	Yes	MLOC_60661.1	LC	2	107.15	578796040	-	-	-	-																GO:0010940	name: positive regulation of necrotic cell death	namespace: biological_process
extended	2	-	-		Yes	Yes	MLOC_63400.1	LC	2	107.15	578796040	-	-	-	-																GO:0010941	name: regulation of cell death	namespace: biological_process
extended	2	-	-		Yes	Yes	MLOC_69736.1	LC	2	107.15	578796040	-	-	-	-																GO:0010942	name: positive regulation of cell death	namespace: biological_process
extended	2	-	-		Yes	Yes	MLOC_71898.1	LC	2	107.15	578796040	-	-	-	-																GO:0012501	name: programmed cell death	namespace: biological_process
extended	2	-	-		Yes	Yes	MLOC_50499.1	LC	2	107.15	578999400	-	-	-	-																GO:0012502	name: induction of programmed cell death	namespace: biological_process
extended	2	-	-		Yes	Yes	MLOC_73476.1	LC	2	107.15	579437120	-	-	-	-																GO:0016265	name: obsolete death	namespace: biological_process
extended	2	-	-		Yes	Yes	AK252763.1	HC	2	107.15	571768960	Translation elongation factor EFTu/EF1A, C-terminal;Protein synthesis factor, GTP-binding;Translation elongation factor EFTu/EF1A, domain 2	IPR004160,IPR000795,IPR004161	PF03143,PF00009,PF03144	GO:0005525	GO:0005525	GO:0003924														GO:0012501	name: programmed cell death	namespace: biological_process
extended	2	-	-		Yes	Yes	AK358395	HC	2	107.15	571768960	EF-HAND 2;EF-Hand 1, calcium-binding site;EF-hand;Protein kinase, catalytic domain;Calcium-binding EF-hand;Protein kinase, ATP binding site;Serine/threonine-protein kinase, active site;Serine/threonine-protein kinase-like domain;Serine/threonine-protein kinase domain	IPR018249,IPR018247,IPR018248,IPR000719,IPR002048,IPR017441,IPR008271,IPR017442,IPR002290	PS50222,PS00018,PF00036,PS50011,SM00054,PS00107,PS00108,PTHR24349,PF00069,SM00220	GO:0004672	GO:0006468	GO:0005524	GO:0005509	GO:0005524	GO:0006468	GO:0004674	GO:0006468	GO:0005524	GO:0004672	GO:0005524	GO:0004674					GO:0006915	name: apoptotic process	namespace: biological_process
extended	2	-	-		Yes	Yes	MLOC_30881.1	HC	2	107.15	571768960	Pectinesterase inhibitor	IPR006501	PF04043	GO:0004857	GO:0030599															GO:0005524	name: ATP binding	namespace: molecular_function
extended	2	-	-		Yes	Yes	MLOC_56261.2	HC	2	107.15	571768960	ABC transporter, transmembrane domain;ABC transporter-like	IPR001140,IPR003439	PF00664,PF00005	GO:0016021	GO:0055085	GO:0006810	GO:0005524	GO:0042626	GO:0016887	GO:0005524										GO:0004672	name: protein kinase activity	namespace: molecular_function
extended	2	-	-		Yes	Yes	MLOC_71043.1	HC	2	107.15	571768960	Pentatricopeptide repeat	IPR002885	PF01535																	GO:0005515	protein binding	molecular function
extended	2	-	-		Yes	Yes	AK369188	HC	2	107.15	574526720	-	-	-	-
extended	2	-	-		Yes	Yes	AK373673	HC	2	107.15	574526720	SCAMP	IPR007273	PTHR10687,PF04144,PTHR10687:SF2	GO:0016021	GO:0015031
extended	2	-	-		Yes	Yes	AK376691	HC	2	107.15	574526720	Apoptosis regulator, Bcl-2 protein, BAG;Ubiquitin supergroup;Ubiquitin	IPR003103,IPR019955,IPR000626	PF02179,PTHR12329:SF8,PTHR12329,PS50053,SM00213,PF00240	GO:0006915	GO:0005515
extended	2	-	-		Yes	Yes	MLOC_14305.1	HC	2	107.15	574526720	Floricaula/leafy protein	IPR002910	PF01698	GO:0003677	GO:0006355
extended	2	-	-		Yes	Yes	MLOC_38555.1	HC	2	107.15	574526720	Proteasome component (PCI) domain	IPR000717	SM00088,PF01399,PTHR10539	GO:0005515
extended	2	-	-		Yes	Yes	MLOC_39219.1	HC	2	107.15	574526720	Glycoside hydrolase, family 17;X8	IPR000490,IPR012946	PF00332,PF07983	GO:0004553	GO:0005975
extended	2	-	-		Yes	Yes	MLOC_4226.1	HC	2	107.15	574526720	F-box domain, cyclin-like	IPR001810	PF00646	GO:0005515
extended	2	-	-		Yes	Yes	MLOC_4227.3	HC	2	107.15	574526720	-	-	-	-
extended	2	-	-		Yes	Yes	MLOC_52313.1	HC	2	107.15	574526720	Serine/threonine-protein kinase-like domain	IPR017442	PF00069	GO:0006468	GO:0005524	GO:0004672
extended	2	-	-		Yes	Yes	MLOC_52314.3	HC	2	107.15	574526720	EGF calcium-binding;Wall-associated kinase;Serine/threonine-protein kinase-like domain	IPR013091,IPR013695,IPR017442	PF07645,PF08488,PF00069	GO:0004674	GO:0016021	GO:0006468	GO:0005524	GO:0004672
extended	2	-	-		Yes	Yes	MLOC_54514.2	HC	2	107.15	574526720	Domain of unknown function DUF59	IPR002744	PF01883
extended	2	-	-		Yes	Yes	MLOC_54515.1	HC	2	107.15	574526720	Protein of unknown function DUF760	IPR008479	PF05542
extended	2	-	-		Yes	Yes	MLOC_57360.1	HC	2	107.15	574526720	High mobility group, HMG1/HMG2	IPR000910	SM00398,PS50118,PF00505,PTHR13711:SF39,PTHR13711	GO:0003677
extended	2	-	-		Yes	Yes	MLOC_59557.1	HC	2	107.15	574526720	-	-	-	-
extended	2	-	-		Yes	Yes	MLOC_60587.1	HC	2	107.15	574526720	DNA helicase, UvrD/REP type	IPR000212	PF00580	GO:0004003	GO:0005524	GO:0006281	GO:0003677
extended	2	-	-		Yes	Yes	MLOC_60773.1	HC	2	107.15	574526720	-	-	-	-
extended	2	-	-		Yes	Yes	MLOC_63913.2	HC	2	107.15	574526720	Brevis radix-like domain	IPR013591	PF08381
extended	2	-	-		Yes	Yes	MLOC_65616.3	HC	2	107.15	574526720	Leucine-rich repeat-containing N-terminal, type 2;Serine-threonine/tyrosine-protein kinase;Leucine-rich repeat	IPR013210,IPR001245,IPR001611	PF08263,PF07714,PF00560	GO:0004672	GO:0006468	GO:0005515
extended	2	-	-		Yes	Yes	MLOC_71991.1	HC	2	107.15	574526720	Wound-inducible basic	IPR012643	PF08186
extended	2	-	-		Yes	Yes	MLOC_7285.1	HC	2	107.15	574526720	DNA helicase, UvrD/REP type	IPR000212	PF00580	GO:0004003	GO:0005524	GO:0006281	GO:0003677
extended	2	-	-		Yes	Yes	AK371889	HC	2	107.15	574911120	-	-	-	-
extended	2	-	-		Yes	Yes	MLOC_10177.1	HC	2	107.15	574911120	F-box domain, cyclin-like	IPR001810	PF00646	GO:0005515
extended	2	-	-		Yes	Yes	MLOC_17045.1	HC	2	107.15	574911120	WD40 repeat, subgroup;F-box domain, cyclin-like	IPR019781,IPR001810	PF00400,PF00646	GO:0005515
extended	2	-	-		Yes	Yes	MLOC_80136.1	HC	2	107.15	574911120	EKC/KEOPS complex, subunit Pcc1	IPR015419	PF09341
extended	2	-	-		Yes	Yes	MLOC_80137.1	HC	2	107.15	574911120	Malectin;Serine-threonine/tyrosine-protein kinase	IPR021720,IPR001245	PF11721,PF07714	GO:0004672	GO:0006468
extended	2	-	-		Yes	Yes	AK251247.1	HC	2	107.15	576399120	Signal recognition particle, SRP14 subunit	IPR003210	PF02290	GO:0030942	GO:0006614	GO:0005786	GO:0008312
extended	2	-	-		Yes	Yes	AK357927	HC	2	107.15	576399120	Serine/threonine-protein kinase-like domain;Leucine-rich repeat;Serine/threonine-protein kinase, active site;Protein kinase, catalytic domain	IPR017442,IPR001611,IPR008271,IPR000719	PTHR24420,PF00069,PF00560,PTHR24420:SF841,PR00019,PS00108,PS50011	GO:0006468	GO:0005524	GO:0004672	GO:0005515	GO:0006468	GO:0004674	GO:0004672	GO:0006468	GO:0005524
extended	2	-	-		Yes	Yes	AK358265	HC	2	107.15	576399120	Gibberellin regulated protein	IPR003854	PF02704
extended	2	-	-		Yes	Yes	MLOC_14267.2	HC	2	107.15	576399120	-	-	-	-
extended	2	-	-		Yes	Yes	MLOC_56457.1	HC	2	107.15	576399120	Serine/threonine-protein kinase-like domain;Malectin;Protein kinase, ATP binding site;Serine/threonine-protein kinase, active site;Protein kinase, catalytic domain	IPR017442,IPR021720,IPR017441,IPR008271,IPR000719	PF00069,PTHR24420:SF743,PF11721,PS00107,PS00108,PTHR24420,PS50011	GO:0006468	GO:0005524	GO:0004672	GO:0005524	GO:0006468	GO:0004674	GO:0004672	GO:0006468	GO:0005524
extended	2	-	-		Yes	Yes	MLOC_67469.1	HC	2	107.15	576399120	-	-	-	-
extended	2	-	-		Yes	Yes	MLOC_67470.2	HC	2	107.15	576399120	-	-	-	-
extended	2	-	-		Yes	Yes	AK366340	HC	2	107.15	577832560	SIT4 phosphatase-associated protein family	IPR007587	PTHR12634,PF04499
extended	2	-	-		Yes	Yes	AK369190	HC	2	107.15	577832560	Glycine cleavage T-protein, C-terminal barrel;Glycine cleavage T-protein, N-terminal	IPR013977,IPR006222	PF08669,PF01571,PTHR13847,PTHR13847:SF5	GO:0004047	GO:0006546	GO:0005737
extended	2	-	-		Yes	Yes	MLOC_15955.1	HC	2	107.15	577832560	ABC transporter, transmembrane domain	IPR001140	PF00664	GO:0016021	GO:0055085	GO:0006810	GO:0005524	GO:0042626
extended	2	-	-		Yes	Yes	MLOC_244.1	HC	2	107.15	577832560	Plant lipid transfer protein/seed storage/trypsin-alpha amylase inhibitor	IPR003612	SM00499
extended	2	-	-		Yes	Yes	MLOC_3293.1	HC	2	107.15	577832560	Pathogenic type III effector avirulence factor Avr cleavage site	IPR008700	PF05627
extended	2	-	-		Yes	Yes	MLOC_38729.1	HC	2	107.15	577832560	-	-	-	-
extended	2	-	-		Yes	Yes	MLOC_39585.1	HC	2	107.15	577832560	Pectinesterase inhibitor	IPR006501	PF04043	GO:0004857	GO:0030599
extended	2	-	-		Yes	Yes	MLOC_61991.1	HC	2	107.15	577832560	FMN-dependent dehydrogenase	IPR000262	PF01070	GO:0016491
extended	2	-	-		Yes	Yes	MLOC_66066.1	HC	2	107.15	577832560	tRNA (guanine-N-7) methyltransferase	IPR003358	PF02390	GO:0006400	GO:0008176
extended	2	-	-		Yes	Yes	MLOC_67221.1	HC	2	107.15	577832560	Polyphenol oxidase, central domain;Tyrosinase;Polyphenol oxidase, C-terminal	IPR022739,IPR002227,IPR022740	PF12142,PF00264,PF12143	GO:0004097	GO:0055114	GO:0016491	GO:0008152
extended	2	-	-		Yes	Yes	MLOC_68251.1	HC	2	107.15	577832560	-	-	-	-
extended	2	-	-		Yes	Yes	MLOC_69336.2	HC	2	107.15	577832560	Exonuclease, RNase T/DNA polymerase III	IPR013520	PF00929
extended	2	-	-		Yes	Yes	MLOC_73327.2	HC	2	107.15	577832560	NB-ARC	IPR002182	PF00931	GO:0006915	GO:0005524
extended	2	-	-		Yes	Yes	AK357698	HC	2	107.15	578796040	Zinc finger, DHHC-type, palmitoyltransferase	IPR001594	PS50216,PTHR22883,PF01529	GO:0008270
extended	2	-	-		Yes	Yes	AK372651	HC	2	107.15	578796040	Tyrosinase;Polyphenol oxidase, central domain;Polyphenol oxidase, C-terminal	IPR002227,IPR022739,IPR022740	PS00498,PF00264,PF12142,PF12143,PTHR11474,PS00497,PR00092,PTHR11474:SF5	GO:0016491	GO:0008152	GO:0004097	GO:0055114
extended	2	-	-		Yes	Yes	MLOC_10926.1	HC	2	107.15	578796040	Hypoxia induced protein, domain	IPR007667	PF04588
extended	2	-	-		Yes	Yes	MLOC_11546.3	HC	2	107.15	578796040	FAD linked oxidase, N-terminal;FAD-linked oxidase, C-terminal	IPR006094,IPR004113	PF01565,PF02913	GO:0008762	GO:0055114	GO:0016491	GO:0050660	GO:0003824	GO:0050660
extended	2	-	-		Yes	Yes	MLOC_37696.1	HC	2	107.15	578796040	DTW	IPR005636	PF03942
extended	2	-	-		Yes	Yes	MLOC_39251.1	HC	2	107.15	578796040	Bromodomain	IPR001487	PF00439	GO:0005515
extended	2	-	-		Yes	Yes	MLOC_40031.2	HC	2	107.15	578796040	U box domain	IPR003613	PF04564	GO:0016567	GO:0004842	GO:0000151
extended	2	-	-		Yes	Yes	MLOC_59422.1	HC	2	107.15	578796040	Plant lipid transfer protein/seed storage/trypsin-alpha amylase inhibitor	IPR003612	PF00234
extended	2	-	-		Yes	Yes	MLOC_60662.1	HC	2	107.15	578796040	NAD-dependent epimerase/dehydratase	IPR001509	PF01370	GO:0044237	GO:0003824	GO:0050662
extended	2	-	-		Yes	Yes	MLOC_61131.1	HC	2	107.15	578796040	Ubiquitin;Ribosomal protein L40e	IPR000626,IPR001975	PF00240,PF01020	GO:0005515	GO:0003735	GO:0005840	GO:0006412
extended	2	-	-		Yes	Yes	MLOC_62877.1	HC	2	107.15	578796040	Myb, DNA-binding	IPR014778	PF00249
extended	2	-	-		Yes	Yes	MLOC_63401.3	HC	2	107.15	578796040	Zinc finger, FYVE-type;Regulator of chromosome condensation, RCC1;Brevis radix-like domain	IPR000306,IPR000408,IPR013591	PF01363,PF00415,PF08381	GO:0046872
extended	2	-	-		Yes	Yes	MLOC_66280.1	HC	2	107.15	578796040	Legume lectin, beta chain;Protein kinase, ATP binding site;Protein kinase, catalytic domain;Serine/threonine-protein kinase, active site;Serine/threonine-protein kinase-like domain	IPR001220,IPR017441,IPR000719,IPR008271,IPR017442	PTHR24420:SF658,PF00139,PS00107,PS50011,PS00108,PTHR24420,PF00069	GO:0005488	GO:0005524	GO:0004672	GO:0006468	GO:0005524	GO:0006468	GO:0004674	GO:0006468	GO:0005524	GO:0004672
extended	2	-	-		Yes	Yes	MLOC_69651.1	HC	2	107.15	578796040	-	-	-	-
extended	2	-	-		Yes	Yes	MLOC_70405.1	HC	2	107.15	578796040	-	-	-	-
extended	2	-	-		Yes	Yes	MLOC_73528.1	HC	2	107.15	578796040	SET domain	IPR001214	PF00856	GO:0005515
extended	2	-	-		Yes	Yes	MLOC_77880.1	HC	2	107.15	578796040	Serine-threonine/tyrosine-protein kinase;Legume lectin, beta chain	IPR001245,IPR001220	PF07714,PF00139	GO:0004672	GO:0006468	GO:0005488
extended	2	-	-		Yes	Yes	MLOC_7955.1	HC	2	107.15	578796040	Ribosomal protein L11, N-terminal;Ribosomal protein L11;Ribosomal protein L11, conserved site;Ribosomal protein L11, C-terminal domain	IPR020784,IPR000911,IPR020785,IPR020783	PF03946,SM00649,PS00359,PTHR11661,PF00298	GO:0003735	GO:0006412	GO:0005840	GO:0006412	GO:0003735	GO:0005840
extended	2	-	-		Yes	Yes	AK354763	HC	2	107.15	578999400	WD40 repeat, subgroup	IPR019781	PF00400
extended	2	-	-		Yes	Yes	AK369112	HC	2	107.15	578999400	Alternative oxidase	IPR002680	PF01786	GO:0007585	GO:0055114	GO:0005740
extended	2	-	-		Yes	Yes	AK357373	HC	2	107.15	579437120	Imidazoleglycerol-phosphate dehydratase;Imidazoleglycerol-phosphate dehydratase, conserved site	IPR000807,IPR020565	PF00475,PTHR23133:SF2,PTHR23133,PS00955,PS00954	GO:0000105	GO:0004424
extended	2	-	-		Yes	Yes	AK365310	HC	2	107.15	579437120	Glycosyltransferase AER61, uncharacterised	IPR007657	PF04577,PTHR20961	GO:0016757
extended	2	-	-		Yes	Yes	AK370277	HC	2	107.15	579437120	Scramblase	IPR005552	PTHR23248:SF2,PF03803,PTHR23248
extended	2	-	-		Yes	Yes	MLOC_13009.1	HC	2	107.15	579437120	Peptidase S8, subtilisin-related;Peptidase S8, subtilisin, Ser-active site;Peptidase S8/S53, subtilisin/kexin/sedolisin;Proteinase inhibitor I9, subtilisin propeptide;Protease-associated domain, PA	IPR015500,IPR023828,IPR000209,IPR010259,IPR003137	PTHR10795,PS51257,PTHR10795:SF17,PS00138,PF00082,PF05922,PR00723,PF02225	GO:0006508	GO:0004252	GO:0042802	GO:0043086	GO:0004252
extended	2	-	-		Yes	Yes	MLOC_36345.3	HC	2	107.15	579437120	Helix-loop-helix DNA-binding domain	IPR001092	PF00010	GO:0006355
extended	2	-	-		Yes	Yes	MLOC_7281.2	HC	2	107.25	579437120	Protein of unknown function DUF594	IPR007658	PF04578
extended	2	-	-		Yes	Yes	MLOC_70378.1	LC	2	107.56	579437120	-	-	-	-
extended	2	-	-		Yes	Yes	MLOC_17529.1	HC	2	107.56	579437120	Exostosin-like	IPR004263	PS51257,PF03016,PTHR11062,PTHR11062:SF27	GO:0016020
extended	2	-	-		Yes	Yes	MLOC_70379.1	HC	2	107.56	579437120	Protein of unknown function DUF581	IPR007650	PF04570
extended	2	-	-		Yes	Yes	MLOC_71450.3	HC	2	107.56	579437120	Protein phosphatase 2C-like	IPR001932	PF00481	GO:0003824
extended	2	-	-		Yes	Yes	MLOC_13942.2	HC	2	107.56	579437120	Cytochrome P450	IPR001128	PF00067	GO:0016705	GO:0055114	GO:0005506	GO:0009055	GO:0020037
extended	2	-	-		Yes	Yes	MLOC_3091.1	HC	2	107.56	579437120	Ribosome 60S biogenesis N-terminal	IPR021714	PF11707
extended	2	-	-		Yes	Yes	MLOC_9887.1	HC	2	107.56	579437120	Plant lipid transfer protein/seed storage/trypsin-alpha amylase inhibitor	IPR003612	PF00234
extended	2	-	-		Yes	Yes	MLOC_65104.1	LC	2	107.62	579437120	-	-	-	-
extended	2	-	-		Yes	Yes	MLOC_65105.1	LC	2	107.62	579437120	-	-	-	-
extended	2	-	-		Yes	Yes	MLOC_65103.2	HC	2	107.62	579437120	Flavin amine oxidase;Amine oxidase	IPR001613,IPR002937	PR00757,PTHR10742,PF01593,PTHR10742:SF30	GO:0016491	GO:0055114
extended	2	-	-		Yes	Yes	MLOC_70224.3	LC	2	107.68	579437120	-	-	-	-
extended	2	-	-		Yes	Yes	MLOC_21964.1	LC	2	107.95	579843840	-	-	-	-
extended	2	-	-		Yes	Yes	MLOC_8384.1	LC	2	107.97	579843840	-	-	-	-
extended	2	-	-		Yes	Yes	MLOC_56837.1	HC	2	107.97	579843840	Protein of unknown function DUF581	IPR007650	PF04570
extended	2	-	-		Yes	Yes	MLOC_64880.1	HC	2	107.97	579843840	EGF calcium-binding;Serine/threonine-protein kinase-like domain	IPR013091,IPR017442	PF07645,PF00069	GO:0006468	GO:0005524	GO:0004672
extended	2	-	-		Yes	Yes	MLOC_68232.1	HC	2	107.97	579843840	-	-	-	-
alignment	2	108	581285960	not available	No	No	MLOC_17188.1	LC	2	108	579843840	-	-	-	-
extended	2	-	-		Yes	Yes	AK362799	HC	2	108	581285960	Protein of unknown function DUF581	IPR007650	PF04570
extended	2	-	-		Yes	Yes	AK365196	HC	2	108	581285960	Zinc finger, C3HC4 RING-type;Zinc finger, RING-type	IPR018957,IPR001841	PF00097,SM00184,PTHR14155,PS50089	GO:0008270	GO:0005515
extended	2	-	-		Yes	Yes	AK365721	HC	2	108	581285960	-	-	-	-
extended	2	-	-		Yes	Yes	AK375354	HC	2	108	581285960	Pectinesterase inhibitor	IPR006501	PTHR22931:SF11,PTHR22931,PF04043,SM00856	GO:0004857	GO:0030599
extended	2	-	-		Yes	Yes	MLOC_54731.3	HC	2	108	581285960	ABC transporter, transmembrane domain	IPR001140	PF00664	GO:0016021	GO:0055085	GO:0006810	GO:0005524	GO:0042626
extended	2	-	-		Yes	Yes	MLOC_54972.2	HC	2	108	581285960	Ionotropic glutamate receptor;Extracellular solute-binding protein, family 3;Extracellular ligand-binding receptor	IPR001320,IPR001638,IPR001828	PF00060,PF00497,PF01094	GO:0004970	GO:0005234	GO:0016020	GO:0005215	GO:0006810	GO:0030288
extended	2	-	-		Yes	Yes	MLOC_54973.1	HC	2	108	581285960	CCAAT-binding factor	IPR005612	PF03914
extended	2	-	-		Yes	Yes	MLOC_54974.4	HC	2	108	581285960	Nucleotide-diphospho-sugar transferase, predicted	IPR005069	PF03407
extended	2	-	-		Yes	Yes	MLOC_56806.1	HC	2	108	581285960	Protein of unknown function DUF581	IPR007650	PF04570
extended	2	-	-		Yes	Yes	MLOC_59357.1	HC	2	108	581285960	Pectinesterase inhibitor	IPR006501	PF04043	GO:0004857	GO:0030599
extended	2	-	-		Yes	Yes	MLOC_6092.2	HC	2	108	581285960	Brix domain	IPR007109	PF04427,PTHR13634,SM00879,PS50833
extended	2	-	-		Yes	Yes	MLOC_62243.3	HC	2	108	581285960	DNA replication factor Dna2;DNA helicase, UvrD/REP type	IPR014808,IPR000212	PF08696,PF00580	GO:0005524	GO:0004003	GO:0003677	GO:0006260	GO:0004003	GO:0005524	GO:0006281	GO:0003677
extended	2	-	-		Yes	Yes	MLOC_6850.1	HC	2	108	581285960	ABC transporter, transmembrane domain	IPR001140	PF00664	GO:0016021	GO:0055085	GO:0006810	GO:0005524	GO:0042626
extended	2	-	-		Yes	Yes	MLOC_77551.1	HC	2	108	581285960	Malectin	IPR021720	PF11721
extended	2	-	-		Yes	Yes	MLOC_78415.2	HC	2	108	581285960	Protein of unknown function DUF581	IPR007650	PF04570
extended	2	-	-		Yes	Yes	MLOC_78909.1	HC	2	108	581285960	Protein of unknown function DUF581	IPR007650	PF04570
extended	2	-	-		Yes	Yes	MLOC_21840.1	HC	2	108.07	581285960	Domain of unknown function DUF250	IPR004853	PF03151
extended	2	-	-		Yes	Yes	MLOC_53911.1	HC	2	108.22	581285960	-	-	-	-
extended	2	-	-		Yes	Yes	MLOC_55747.1	HC	2	108.22	581285960	Uncharacterised domain XH	IPR005379	PF03469
extended	2	-	-		Yes	Yes	MLOC_77691.1	HC	2	108.22	581285960	ABC transporter, transmembrane domain;ABC transporter-like	IPR001140,IPR003439	PF00664,PF00005	GO:0016021	GO:0055085	GO:0006810	GO:0005524	GO:0042626	GO:0016887	GO:0005524
extended	2	-	-		Yes	Yes	AK370740	HC	2	108.48	581285960	Cyclin C/H/T/L;Cyclin, N-terminal;Cyclin-like	IPR015429,IPR006671,IPR013763	PTHR10026:SF10,PTHR10026,PF00134,SM00385	GO:0000079	GO:0019901	GO:0006355
extended	2	-	-		Yes	Yes	MLOC_62355.1	LC	2	108.69	581285960	-	-	-	-
extended	2	-	-		Yes	Yes	AK366476	HC	2	108.69	581285960	-	-	-	-
extended	2	-	-		Yes	Yes	MLOC_76818.1	HC	2	108.69	581285960	-	-	-	-
extended	2	-	-		Yes	Yes	MLOC_24505.1	HC	2	109.06	581285960	Heavy metal-associated domain, HMA	IPR006121	PF00403	GO:0046872	GO:0030001
extended	2	-	-		Yes	Yes	MLOC_45040.1	HC	2	109.21	581934480	-	-	-	-
extended	2	-	-		Yes	Yes	AK367621	LC	2	109.42	581934480	-	-	-	-
extended	2	-	-		Yes	Yes	MLOC_45113.1	LC	2	109.42	581934480	-	-	-	-
extended	2	-	-		Yes	Yes	MLOC_46718.1	LC	2	109.42	581934480	-	-	-	-
extended	2	-	-		Yes	Yes	MLOC_67777.1	LC	2	109.42	581934480	-	-	-	-
extended	2	-	-		Yes	Yes	MLOC_79509.1	LC	2	109.42	581934480	-	-	-	-
extended	2	-	-		Yes	Yes	AK364533	HC	2	109.42	581934480	-	-	-	-
extended	2	-	-		Yes	Yes	AK366740	HC	2	109.42	581934480	Glycoside hydrolase, family 3, N-terminal;Glycoside hydrolase, family 3, C-terminal	IPR001764,IPR002772	PF00933,PF01915	GO:0005975	GO:0004553	GO:0004553	GO:0005975
extended	2	-	-		Yes	Yes	AK367276	HC	2	109.42	581934480	RNA recognition motif domain	IPR000504	PF00076	GO:0003676
extended	2	-	-		Yes	Yes	AK367512	HC	2	109.42	581934480	Glycoside hydrolase, family 32;Glycosyl hydrolases family 32, N-terminal;Glycosyl hydrolase family 32, C-terminal	IPR001362,IPR013148,IPR013189	SM00640,PF00251,PF08244	GO:0005975	GO:0004553
extended	2	-	-		Yes	Yes	MLOC_45114.1	HC	2	109.42	581934480	Helix-loop-helix DNA-binding domain	IPR001092	PF00010	GO:0006355
extended	2	-	-		Yes	Yes	MLOC_7632.3	HC	2	109.42	581934480	F-box domain, cyclin-like	IPR001810	PF00646	GO:0005515
extended	2	-	-		Yes	Yes	MLOC_78745.1	HC	2	109.42	581934480	Pollen Ole e 1 allergen/extensin	IPR006041	PF01190
extended	2	-	-		Yes	Yes	MLOC_22580.1	LC	2	110.52	581934480	-	-	-	-
extended	2	-	-		Yes	Yes	AK369689	HC	2	110.8	581934480	Myb transcription factor;Transcription regulator HTH, Myb-type, DNA-binding;SANT domain, DNA binding;Myb, DNA-binding	IPR015495,IPR017930,IPR001005,IPR014778	PTHR10641,PS51294,SM00717,PF00249	GO:0003677
extended	2	-	-		Yes	Yes	AK249899.1	HC	2	110.91	584655040	SNARE associated Golgi protein	IPR015414	PF09335
extended	2	-	-		Yes	Yes	AK356275	HC	2	110.91	584655040	-	-	-	-
extended	2	-	-		Yes	Yes	AK362948	HC	2	110.91	584655040	Pentatricopeptide repeat	IPR002885	PF01535,PTHR24015,PS51375
extended	2	-	-		Yes	Yes	AK371855	HC	2	110.91	584655040	-	-	-	-
extended	2	-	-		Yes	Yes	AK372212	HC	2	110.91	584655040	RNA recognition motif domain	IPR000504	PS50102,PF00076,PTHR24012:SF67,PTHR24012,SM00360	GO:0003676
extended	2	-	-		Yes	Yes	MLOC_10028.1	HC	2	110.91	584655040	Lipocalin/cytosolic fatty-acid binding protein domain	IPR000566	PF08212	GO:0005488
extended	2	-	-		Yes	Yes	MLOC_14076.1	HC	2	110.91	584655040	Bet v I allergen	IPR000916	PR00634,PF00407	GO:0006952	GO:0009607
extended	2	-	-		Yes	Yes	MLOC_16904.1	HC	2	110.91	584655040	-	-	-	-
extended	2	-	-		Yes	Yes	MLOC_34590.1	HC	2	110.91	584655040	CDP-alcohol phosphatidyltransferase	IPR000462	PF01066	GO:0016020	GO:0016780	GO:0008654
extended	2	-	-		Yes	Yes	MLOC_36505.1	HC	2	110.91	584655040	RNA recognition motif domain	IPR000504	PF00076	GO:0003676
extended	2	-	-		Yes	Yes	MLOC_38691.1	HC	2	110.91	584655040	-	-	-	-
extended	2	-	-		Yes	Yes	MLOC_39480.2	HC	2	110.91	584655040	-	-	-	-
extended	2	-	-		Yes	Yes	MLOC_46530.1	HC	2	110.91	584655040	-	-	-	-
extended	2	-	-		Yes	Yes	MLOC_54759.1	HC	2	110.91	584655040	Starch synthase, catalytic domain;Carbohydrate binding module family 25;Glycosyl transferase, family 1	IPR013534,IPR005085,IPR001296	PF08323,PF03423,PF00534	GO:0009058
extended	2	-	-		Yes	Yes	MLOC_54978.1	HC	2	110.91	584655040	U box domain	IPR003613	SM00504,PF04564,PTHR22849	GO:0016567	GO:0004842	GO:0000151
extended	2	-	-		Yes	Yes	MLOC_54979.1	HC	2	110.91	584655040	Glycosyl transferase, family 1	IPR001296	PF00534	GO:0009058
extended	2	-	-		Yes	Yes	MLOC_5583.3	HC	2	110.91	584655040	NB-ARC	IPR002182	PF00931	GO:0006915	GO:0005524
extended	2	-	-		Yes	Yes	MLOC_57847.2	HC	2	110.91	584655040	Ataxin-2, C-terminal	IPR009818	PF07145
extended	2	-	-		Yes	Yes	MLOC_60062.7	HC	2	110.91	584655040	Phosphoenolpyruvate carboxykinase, ATP-utilising	IPR001272	PF01293	GO:0005524	GO:0006094	GO:0004612
extended	2	-	-		Yes	Yes	MLOC_60063.1	HC	2	110.91	584655040	Protein of unknown function DUF827, plant	IPR008545	PF05701
extended	2	-	-		Yes	Yes	MLOC_61751.1	HC	2	110.91	584655040	Plant lipid transfer protein/seed storage/trypsin-alpha amylase inhibitor	IPR003612	SM00499
extended	2	-	-		Yes	Yes	MLOC_63051.7	HC	2	110.91	584655040	Zinc finger, C6HC-type;RWD domain	IPR002867,IPR006575	PF01485,PF05773	GO:0008270	GO:0005515
extended	2	-	-		Yes	Yes	MLOC_64786.1	HC	2	110.91	584655040	Alpha/beta hydrolase fold-1	IPR000073	PF00561
extended	2	-	-		Yes	Yes	MLOC_65828.2	HC	2	110.91	584655040	-	-	-	-
extended	2	-	-		Yes	Yes	MLOC_65829.2	HC	2	110.91	584655040	Homeobox;Lipid-binding START	IPR001356,IPR002913	PF00046,PF01852	GO:0003700	GO:0043565	GO:0006355
extended	2	-	-		Yes	Yes	MLOC_69202.1	HC	2	110.91	584655040	Protein of unknown function DUF597	IPR006734	PF04640
extended	2	-	-		Yes	Yes	MLOC_69543.1	HC	2	110.91	584655040	Leucine-rich repeat-containing N-terminal, type 2;Leucine-rich repeat	IPR013210,IPR001611	PF08263,PTHR24420:SF646,PTHR24420,PF00560	GO:0005515
extended	2	-	-		Yes	Yes	MLOC_70640.1	HC	2	110.91	584655040	Helix-loop-helix DNA-binding domain	IPR001092	PF00010	GO:0006355
extended	2	-	-		Yes	Yes	MLOC_70900.1	HC	2	110.91	584655040	ABC transporter-like;ABC transporter, haem export, CcmA;ATPase, AAA+ type, core	IPR003439,IPR005895,IPR003593	PTHR24220,PF00005,PS51243,SM00382,PTHR24220:SF167,PS50893	GO:0016887	GO:0005524	GO:0017004	GO:0005215	GO:0030288	GO:0000166	GO:0017111
extended	2	-	-		Yes	Yes	MLOC_71969.1	HC	2	110.91	584655040	-	-	-	-
extended	2	-	-		Yes	Yes	MLOC_75677.2	HC	2	110.91	584655040	Exocyst complex subunit Sec15-like	IPR007225	PF04091	GO:0006904	GO:0000145
extended	2	-	-		Yes	Yes	MLOC_76088.1	HC	2	110.91	584655040	NB-ARC	IPR002182	PF00931	GO:0006915	GO:0005524
extended	2	-	-		Yes	Yes	MLOC_7719.1	HC	2	110.91	584655040	-	-	-	-
extended	2	-	-		Yes	Yes	MLOC_77821.1	HC	2	110.91	584655040	BTB/POZ;MATH	IPR013069,IPR002083	PF00651,PF00917	GO:0005515
extended	2	-	-		Yes	Yes	MLOC_22353.1	LC	2	111.26	584655040	-	-	-	-
extended	2	-	-		Yes	Yes	MLOC_41338.2	LC	2	111.26	584655040	-	-	-	-
extended	2	-	-		Yes	Yes	MLOC_53452.1	LC	2	111.26	584655040	-	-	-	-
extended	2	-	-		Yes	Yes	MLOC_74655.1	LC	2	111.26	584655040	-	-	-	-
extended	2	-	-		Yes	Yes	MLOC_80386.1	LC	2	111.26	584655040	-	-	-	-
extended	2	-	-		Yes	Yes	MLOC_8582.1	LC	2	111.26	584655040	-	-	-	-
extended	2	-	-		Yes	Yes	MLOC_20358.1	HC	2	111.26	584655040	-	-	-	-
extended	2	-	-		Yes	Yes	MLOC_53451.2	HC	2	111.26	584655040	-	-	-	-
extended	2	-	-		Yes	Yes	MLOC_60024.1	HC	2	111.26	584655040	RWD domain;Zinc finger, C6HC-type	IPR006575,IPR002867	PF05773,PF01485	GO:0005515	GO:0008270
extended	2	-	-		Yes	Yes	MLOC_8581.2	HC	2	111.26	584655040	Zinc finger, C6HC-type	IPR002867	PF01485	GO:0008270
extended	2	-	-		Yes	Yes	MLOC_15754.1	LC	2	111.54	584655040	-	-	-	-
extended	2	-	-		Yes	Yes	MLOC_35670.1	LC	2	111.65	584655040	-	-	-	-
extended	2	-	-		Yes	Yes	MLOC_52600.1	LC	2	111.65	584655040	-	-	-	-
extended	2	-	-		Yes	Yes	MLOC_52601.1	HC	2	111.65	584655040	Zinc finger, CCCH-type;K Homology, type 1, subgroup	IPR000571,IPR018111	PF00642,PF00013	GO:0008270	GO:0003676	GO:0003723
extended	2	-	-		Yes	Yes	MLOC_38435.1	HC	2	111.72	584655040	-	-	-	-
extended	2	-	-		Yes	Yes	MLOC_38436.1	HC	2	111.72	584655040	NB-ARC	IPR002182	PF00931	GO:0006915	GO:0005524
extended	2	-	-		Yes	Yes	MLOC_6986.1	HC	2	111.72	584655040	PAK-box/P21-Rho-binding	IPR000095	PF00786	GO:0005515
extended	2	-	-		Yes	Yes	MLOC_25719.1	LC	2	111.72	584655040	-	-	-	-
extended	2	-	-		Yes	Yes	MLOC_65099.1	LC	2	111.72	584655040	-	-	-	-
extended	2	-	-		Yes	Yes	MLOC_6985.1	LC	2	111.72	584655040	-	-	-	-
extended	2	-	-		Yes	Yes	MLOC_13115.2	HC	2	111.81	584655040	-	-	-	-
extended	2	-	-		Yes	Yes	MLOC_10733.1	LC	2	111.83	584655040	-	-	-	-
extended	2	-	-		Yes	Yes	MLOC_56640.1	LC	2	111.83	584655040	-	-	-	-
extended	2	-	-		Yes	Yes	MLOC_56641.1	LC	2	111.83	584655040	-	-	-	-
extended	2	-	-		Yes	Yes	MLOC_56642.1	LC	2	111.83	584655040	-	-	-	-
extended	2	-	-		Yes	Yes	MLOC_56643.3	LC	2	111.83	584655040	-	-	-	-
extended	2	-	-		Yes	Yes	MLOC_56644.1	LC	2	111.83	584655040	-	-	-	-
extended	2	-	-		Yes	Yes	MLOC_56645.1	LC	2	111.83	584655040	-	-	-	-
extended	2	-	-		Yes	Yes	MLOC_56646.1	LC	2	111.83	584655040	-	-	-	-
aMarker located in the extended ±4cM intervall (extended), position of best sequence alignment (alignment)

## Sheet: Qps.3H-1
Supporting Information 2 | Alignment of markers with DR >50% using BARLEYMAP
Markera	Chr	cM	Base pairs	barlex_pos_bp	Multiple positions	Other alignments	Gene	HC/LC	Chr	cM	Bp	Description	InterPro	Signatures	GO terms									total of relevant GO terms:
extended	3	-	-		Yes	Yes	MLOC_18177.4	HC	3	55.67	390478480	Myb, DNA-binding;Transcription regulator HTH, Myb-type, DNA-binding;Myb transcription factor;SANT domain, DNA binding	IPR014778,IPR017930,IPR015495,IPR001005	PF00249,PS51294,PTHR10641,SM00717	GO:0003677
extended	3	-	-		Yes	Yes	MLOC_81749.1	LC	3	55.67	390478480	-	-	-	-															GO:0000166	name: nucleotide binding	namespace: molecular_function
extended	3	-	-		Yes	Yes	MLOC_57394.3	LC	3	55.67	391611840	-	-	-	-															GO:0019001	name: guanyl nucleotide binding	namespace: molecular_function
extended	3	-	-		Yes	Yes	AK360453	HC	3	55.67	392538120	-	-	-	-															GO:0050660	name: flavin adenine dinucleotide binding	namespace: molecular_function
extended	3	-	-		Yes	Yes	AK368147	HC	3	55.67	392538120	GH3 auxin-responsive promoter	IPR004993	PF03321																GO:0004096	name: catalase activity	namespace: molecular_function
extended	3	-	-		Yes	Yes	MLOC_66941.1	LC	3	55.67	392538120	-	-	-	-															GO:0006952	name: defense response	namespace: biological_process
extended	3	-	-		Yes	Yes	MLOC_70215.1	HC	3	55.67	393826480	-	-	-	-															GO:0050832	name: defense response to fungus	namespace: biological_process
extended	3	-	-		Yes	Yes	MLOC_75532.1	LC	3	55.7	393826480	-	-	-	-															GO:0004568	name: chitinase activity	namespace: molecular_function
extended	3	-	-		Yes	Yes	MLOC_65990.1	LC	3	55.74	394656040	-	-	-	-															GO:0004601	name: peroxidase activity	namespace: molecular_function
extended	3	-	-		Yes	Yes	MLOC_65991.1	LC	3	55.74	394656040	-	-	-	-															GO:0005777	name: peroxisome	namespace: cellular_component
extended	3	-	-		Yes	Yes	MLOC_65992.1	LC	3	55.74	394656040	-	-	-	-															GO:0006950	name: response to stress	namespace: biological_process
extended	3	-	-		Yes	Yes	MLOC_34719.3	HC	3	55.74	394656040	-	-	-	-															GO:0006979	name: response to oxidative stress	namespace: biological_process
extended	3	-	-		Yes	Yes	MLOC_4116.1	HC	3	55.74	394656040	SAM dependent carboxyl methyltransferase	IPR005299	PF03492	GO:0008168															GO:0007186	name: G-protein coupled receptor signaling pathway	namespace: biological_process
extended	3	-	-		Yes	Yes	MLOC_63995.1	HC	3	55.74	394656040	-	-	-	-															GO:0007205	name: protein kinase C-activating G-protein coupled receptor signaling pathway	namespace: biological_process
extended	3	-	-		Yes	Yes	MLOC_63996.1	HC	3	55.74	394656040	RAG1-activating protein-1-related	IPR004316	PF03083	GO:0016021															GO:0008020	name: G-protein coupled photoreceptor activity	namespace: molecular_function
extended	3	-	-		Yes	Yes	MLOC_7040.1	HC	3	55.74	394656040	Peptidase S8/S53, subtilisin/kexin/sedolisin;Protease-associated domain, PA	IPR000209,IPR003137	PF00082,PF02225	GO:0006508	GO:0004252														GO:0008262	name: nuclear export signal receptor activity	namespace: molecular_function
extended	3	-	-		Yes	Yes	AK353559	HC	3	55.74	396782640	Polyprenyl synthetase	IPR000092	PF00348,PS00723,PS00444,PTHR11525	GO:0008299															GO:0004970	name: ionotropic glutamate receptor activity	namespace: molecular_function
extended	3	-	-		Yes	Yes	AK354325	HC	3	55.74	396782640	F-box domain, cyclin-like	IPR001810	PF00646	GO:0005515															GO:0016998	name: cell wall macromolecule catabolic process	namespace: biological_process
extended	3	-	-		Yes	Yes	AK365977	HC	3	55.74	396782640	-	-	-	-															GO:0005618	name: cell wall	namespace: cellular_component
extended	3	-	-		Yes	Yes	AK367282	HC	3	55.74	396782640	-	-	-	-															GO:0042545	name: cell wall modification	namespace: biological_process
extended	3	-	-		Yes	Yes	MLOC_37776.4	HC	3	55.74	396782640	Clathrin adaptor, mu subunit, C-terminal;AP complex, mu/sigma subunit	IPR008968,IPR022775	PF00928,PF01217	GO:0016192	GO:0030131	GO:0006886	GO:0005515												GO:0042546	name: cell wall biogenesis	namespace: biological_process
extended	3	-	-		Yes	Yes	MLOC_38922.1	HC	3	55.74	396782640	-	-	-	-															GO:0008219	name: cell death	namespace: biological_process
extended	3	-	-		Yes	Yes	MLOC_60990.1	HC	3	55.74	396782640	Lipase, GDSL	IPR001087	PF00657	GO:0016788	GO:0006629														GO:0005035	name: death receptor activity	namespace: molecular_function
extended	3	-	-		Yes	Yes	MLOC_75087.1	HC	3	55.74	396782640	Major facilitator superfamily domain;Major facilitator superfamily	IPR020846,IPR011701	PS50850,PTHR24003,PF07690,PTHR24003:SF2	GO:0016021	GO:0055085														GO:0005037	name: obsolete death receptor adaptor protein activity	namespace: molecular_function
extended	3	-	-		Yes	Yes	AK369626	HC	3	55.81	396782640	Transcriptional coactivator p15;DEK, C-terminal	IPR003173,IPR014876	PF02229,PTHR13215,PF08766	GO:0006355	GO:0003677	GO:0003713													GO:0005038	name: obsolete death receptor interacting protein activity	namespace: molecular_function
extended	3	-	-		Yes	Yes	MLOC_37858.1	LC	3	55.81	396782640	-	-	-	-															GO:0005039	name: obsolete death receptor-associated factor activity	namespace: molecular_function
extended	3	-	-		Yes	Yes	AK362485	HC	3	55.81	398771600	-	-	-	-															GO:0005040	name: decoy death receptor activity	namespace: molecular_function
extended	3	-	-		Yes	Yes	AK370652	HC	3	55.81	398771600	Peptidase M20, dimerisation;Peptidase M20	IPR011650,IPR002933	PF07687,PF01546	GO:0016787	GO:0008152	GO:0016787													GO:0005123	name: death receptor binding	namespace: molecular_function
extended	3	-	-		Yes	Yes	MLOC_4753.2	HC	3	55.81	398771600	Late embryogenesis abundant protein, LEA-3	IPR004238	PTHR23241,PF02987,PTHR23241:SF32																GO:0010343	name: singlet oxygen-mediated programmed cell death	namespace: biological_process
extended	3	-	-		Yes	Yes	MLOC_7612.1	HC	3	55.81	398771600	Vesicle transport v-SNARE, N-terminal	IPR007705	PTHR21230,PF12352,PF05008,PTHR21230:SF16	GO:0016020	GO:0006886														GO:0010421	name: hydrogen peroxide-mediated programmed cell death	namespace: biological_process
extended	3	-	-		Yes	Yes	AK355455	HC	3	56.2	399728880	Helix-loop-helix DNA-binding domain	IPR001092	PTHR12565,PS50888,SM00353	GO:0006355															GO:0010623	name: programmed cell death involved in cell development	namespace: biological_process
extended	3	-	-		Yes	Yes	AK372534	HC	3	56.2	399728880	Myb transcription factor;Transcription regulator HTH, Myb-type, DNA-binding;Myb, DNA-binding;SANT domain, DNA binding	IPR015495,IPR017930,IPR014778,IPR001005	PTHR10641,PS51294,PF00249,SM00717	GO:0003677															GO:0010940	name: positive regulation of necrotic cell death	namespace: biological_process
extended	3	-	-		Yes	Yes	AK375619	HC	3	56.2	399728880	Transcription regulator HTH, Myb-type, DNA-binding;Histone H1/H5;SANT domain, DNA binding;Myb, DNA-binding	IPR017930,IPR005818,IPR001005,IPR014778	PS51294,SM00526,SM00717,PTHR21717,PF00249	GO:0005634	GO:0000786	GO:0003677	GO:0006334	GO:0003677											GO:0010941	name: regulation of cell death	namespace: biological_process
extended	3	-	-		Yes	Yes	MLOC_2059.2	HC	3	56.2	399728880	Heat shock protein DnaJ, N-terminal	IPR001623	PF00226	GO:0031072															GO:0010942	name: positive regulation of cell death	namespace: biological_process
extended	3	-	-		Yes	Yes	MLOC_37262.1	LC	3	56.2	399728880	-	-	-	-															GO:0012501	name: programmed cell death	namespace: biological_process
extended	3	-	-		Yes	Yes	MLOC_39375.5	LC	3	56.2	399728880	-	-	-	-															GO:0012502	name: induction of programmed cell death	namespace: biological_process
extended	3	-	-		Yes	Yes	MLOC_39376.1	LC	3	56.2	399728880	-	-	-	-															GO:0016265	name: obsolete death	namespace: biological_process
extended	3	-	-		Yes	Yes	MLOC_67921.1	LC	3	56.2	399728880	-	-	-	-															GO:0012501	name: programmed cell death	namespace: biological_process
extended	3	-	-		Yes	Yes	MLOC_68964.1	LC	3	56.2	399728880	-	-	-	-															GO:0006915	name: apoptotic process	namespace: biological_process
extended	3	-	-		Yes	Yes	MLOC_70409.1	HC	3	56.2	399728880	Helix-loop-helix DNA-binding domain	IPR001092	PF00010	GO:0006355															GO:0005524	name: ATP binding	namespace: molecular_function
extended	3	-	-		Yes	Yes	MLOC_63875.1	HC	3	56.37	399728880	Translocon Sec61/SecY, plug domain;SecY protein	IPR019561,IPR002208	PF10559,PF00344	GO:0015450	GO:0016020	GO:0015031													GO:0004672	name: protein kinase activity	namespace: molecular_function
extended	3	-	-		Yes	Yes	MLOC_19332.3	HC	3	56.44	399728880	Cellular retinaldehyde-binding/triple function, N-terminal;Cellular retinaldehyde-binding/triple function, C-terminal	IPR008273,IPR001251	PF03765,PF00650																GO:0005515	protein binding	molecular function
extended	3	-	-		Yes	Yes	MLOC_57123.4	HC	3	56.44	399728880	Chloride channel, voltage gated	IPR001807	PF00654	GO:0006821	GO:0016020	GO:0005247	GO:0055085
extended	3	-	-		Yes	Yes	AK248991.1	HC	3	56.62	401445040	Clathrin adaptor, beta-adaptin, appendage, C-terminal subdomain;Clathrin/coatomer adaptor, adaptin-like, N-terminal	IPR015151,IPR002553	PF09066,PF01602	GO:0006886	GO:0030131	GO:0016192	GO:0016192	GO:0030117	GO:0006886
extended	3	-	-		Yes	Yes	MLOC_11565.1	HC	3	56.62	401445040	Mitochondrial outer membrane translocase complex, subunit Tom7	IPR012621	PF08038	GO:0005741	GO:0006886	GO:0015450
extended	3	-	-		Yes	Yes	MLOC_45797.1	LC	3	56.73	401445040	-	-	-	-
extended	3	-	-		Yes	Yes	MLOC_55669.1	HC	3	56.73	401445040	IQ motif, EF-hand binding site	IPR000048	PF00612	GO:0005515
extended	3	-	-		Yes	Yes	MLOC_78658.1	HC	3	56.73	401445040	Mitochondrial substrate/solute carrier	IPR018108	PF00153
extended	3	-	-		Yes	Yes	AK249698.1	HC	3	56.87	401445040	Protein of unknown function DUF778	IPR008496	PF05608
extended	3	-	-		Yes	Yes	MLOC_77725.1	LC	3	56.91	401445040	-	-	-	-
extended	3	-	-		Yes	Yes	MLOC_54431.10	HC	3	56.98	401792240	Leucine-rich repeat;Serine/threonine-protein kinase-like domain	IPR001611,IPR017442	PF00560,PF00069	GO:0005515	GO:0006468	GO:0005524	GO:0004672
extended	3	-	-		Yes	Yes	MLOC_71517.1	HC	3	57.05	401792240	Pentatricopeptide repeat	IPR002885	PF01535
extended	3	-	-		Yes	Yes	MLOC_71518.4	HC	3	57.05	401792240	-	-	-	-
extended	3	-	-		Yes	Yes	MLOC_61617.2	HC	3	57.08	401792240	Lipase, class 3	IPR002921	PF01764	GO:0006629	GO:0004806
extended	3	-	-		Yes	Yes	MLOC_71568.1	LC	3	57.08	401792240	-	-	-	-
extended	3	-	-		Yes	Yes	MLOC_71569.6	HC	3	57.08	401792240	-	-	-	-
extended	3	-	-		Yes	Yes	MLOC_74668.2	LC	3	57.08	401792240	-	-	-	-
extended	3	-	-		Yes	Yes	AK374220	HC	3	57.08	402021640	Myristoyl-CoA:protein N-myristoyltransferase, conserved site;Myristoyl-CoA:protein N-myristoyltransferase, N-terminal;Myristoyl-CoA:protein N-myristoyltransferase;Myristoyl-CoA:protein N-myristoyltransferase, C-terminal	IPR022678,IPR022676,IPR000903,IPR022677	PS00975,PF01233,PTHR11377,PS00976,PF02799	GO:0004379	GO:0004379	GO:0006499
extended	3	-	-		Yes	Yes	MLOC_4270.2	HC	3	57.08	402021640	Survival protein SurE-like phosphatase/nucleotidase	IPR002828	PF01975	GO:0016787
extended	3	-	-		Yes	Yes	MLOC_67295.3	HC	3	57.08	402021640	-	-	-	-
extended	3	-	-		Yes	Yes	AK250647.1	HC	3	57.08	403214520	Histone-binding protein RBBP4;WD40 repeat, subgroup	IPR022052,IPR019781	PF12265,PF00400
extended	3	-	-		Yes	Yes	AK354280	HC	3	57.08	403214520	Glycoside hydrolase, family 13;Alpha-amylase, C-terminal beta-sheet;Alpha amylase;Glycosyl hydrolase, family 13, catalytic domain	IPR006046,IPR012850,IPR015902,IPR006047	PR00110,PF07821,PTHR10357,PTHR10357:SF9,PF00128,SM00810	GO:0005975	GO:0043169	GO:0003824	GO:0005509	GO:0004556	GO:0005975	GO:0043169	GO:0005975	GO:0003824
extended	3	-	-		Yes	Yes	MLOC_68904.4	LC	3	57.08	403570400	-	-	-	-
extended	3	-	-		Yes	Yes	MLOC_73174.1	HC	3	57.08	404248680	Amine oxidase	IPR002937	PTHR10742,PTHR10742:SF40,PF01593	GO:0016491	GO:0055114
extended	3	-	-		Yes	Yes	MLOC_43271.1	HC	3	57.08	404501640	Violaxanthin de-epoxidase	IPR010788	PF07137	GO:0009507	GO:0046422	GO:0055114
extended	3	-	-		Yes	Yes	MLOC_5176.2	HC	3	57.08	404501640	Leucine-rich repeat;Serine/threonine-protein kinase-like domain	IPR001611,IPR017442	PF00560,PF00069	GO:0005515	GO:0006468	GO:0005524	GO:0004672
extended	3	-	-		Yes	Yes	MLOC_61955.1	LC	3	57.15	404501640	-	-	-	-
extended	3	-	-		Yes	Yes	AK368718	HC	3	57.15	404501640	Glycoside hydrolase, family 17	IPR000490	PF00332	GO:0004553	GO:0005975
extended	3	-	-		Yes	Yes	MLOC_39637.1	HC	3	57.15	404501640	Zinc finger, AN1-type;Zinc finger, A20-type	IPR000058,IPR002653	PF01428,PF01754	GO:0008270	GO:0003677	GO:0008270
extended	3	-	-		Yes	Yes	MLOC_61956.2	HC	3	57.15	404501640	Auxin efflux carrier	IPR004776	PF03547	GO:0055085	GO:0016021
extended	3	-	-		Yes	Yes	AK356480	HC	3	57.22	404501640	NADH-ubiquinone oxidoreductase, 20 Kd subunit;[NiFe]-hydrogenase-3-type complex, small subunit/NADH:quinone oxidoreductase, subunit NuoB;NADH:ubiquinone oxidoreductase-like, 20kDa subunit	IPR006138,IPR014406,IPR006137	PS01150,PTHR11995,PF01058	GO:0051539	GO:0048038	GO:0055114	GO:0008137	GO:0051539	GO:0055114	GO:0016651	GO:0051539	GO:0048038	GO:0008137	GO:0055114
extended	3	-	-		Yes	Yes	MLOC_20299.1	LC	3	57.22	404501640	-	-	-	-
extended	3	-	-		Yes	Yes	MLOC_2097.1	HC	3	57.22	404501640	Pentatricopeptide repeat	IPR002885	PF01535
extended	3	-	-		Yes	Yes	MLOC_37110.1	LC	3	57.22	404501640	-	-	-	-
extended	3	-	-		Yes	Yes	MLOC_53068.9	HC	3	57.22	404501640	Serine-threonine/tyrosine-protein kinase	IPR001245	PF07714	GO:0004672	GO:0006468
extended	3	-	-		Yes	Yes	MLOC_7892.1	HC	3	57.22	404501640	-	-	-	-
extended	3	-	-		Yes	Yes	AK363801	LC	3	57.22	405236960	-	-	-	-
extended	3	-	-		Yes	Yes	MLOC_14599.6	HC	3	57.22	405236960	Serine/threonine-protein kinase-like domain	IPR017442	PF00069	GO:0006468	GO:0005524	GO:0004672
extended	3	-	-		Yes	Yes	MLOC_15725.3	HC	3	57.22	405236960	Transcriptional factor B3	IPR003340	PS50863,PF02362	GO:0006355	GO:0003677
extended	3	-	-		Yes	Yes	MLOC_24122.1	LC	3	57.22	405236960	-	-	-	-
extended	3	-	-		Yes	Yes	MLOC_70145.1	LC	3	57.22	405236960	-	-	-	-
extended	3	-	-		Yes	Yes	MLOC_70146.1	LC	3	57.22	405236960	-	-	-	-
extended	3	-	-		Yes	Yes	AK372121	LC	3	57.22	405579200	-	-	-	-
extended	3	-	-		Yes	Yes	MLOC_58478.1	HC	3	57.22	405579200	MADF domain	IPR006578	PF10545
extended	3	-	-		Yes	Yes	MLOC_58480.1	HC	3	57.22	405579200	SEC7-like	IPR000904	PF01369,SM00222,PTHR10663,PTHR10663:SF6,PS50190	GO:0005086	GO:0005622	GO:0032012
extended	3	-	-		Yes	Yes	MLOC_4295.2	HC	3	57.44	406112400	-	-	-	-
extended	3	-	-		Yes	Yes	MLOC_56893.7	HC	3	57.44	406112400	Dil domain	IPR018444	PF01843
extended	3	-	-		Yes	Yes	MLOC_7686.1	LC	3	57.44	406112400	-	-	-	-
extended	3	-	-		Yes	Yes	MLOC_7687.1	LC	3	57.44	406112400	-	-	-	-
extended	3	-	-		Yes	Yes	MLOC_34637.1	HC	3	57.44	406112400	AWPM-19-like	IPR008390	PF05512
extended	3	-	-		Yes	Yes	AK367893	HC	3	57.51	407217240	-	-	-	-
extended	3	-	-		Yes	Yes	MLOC_55427.2	HC	3	57.51	407217240	Methyltransferase type 11	IPR013216	PTHR10108,PF08241,PTHR10108:SF276	GO:0008168	GO:0008152
extended	3	-	-		Yes	Yes	MLOC_56655.1	HC	3	57.51	407217240	IQ motif, EF-hand binding site	IPR000048	PF00612,SM00015,PTHR13140,PTHR13140:SF188,PS50096	GO:0005515
extended	3	-	-		Yes	Yes	MLOC_60568.1	HC	3	57.51	407217240	Pentatricopeptide repeat	IPR002885	PF01535
extended	3	-	-		Yes	Yes	MLOC_56148.2	HC	3	57.54	407217240	Endonuclease/exonuclease/phosphatase	IPR005135	PF03372
extended	3	-	-		Yes	Yes	MLOC_81236.1	HC	3	57.54	407217240	Peptidase M16, N-terminal;Peptidase M16, zinc-binding site;Peptidase M16, C-terminal	IPR011765,IPR001431,IPR007863	PTHR11851,PF00675,PS00143,PTHR11851:SF58,PF05193	GO:0004222	GO:0006508	GO:0006508	GO:0004222	GO:0006508	GO:0004222	GO:0008270
extended	3	-	-		Yes	Yes	MLOC_25731.1	HC	3	57.65	407217240	-	-	-	-
extended	3	-	-		Yes	Yes	MLOC_7074.2	HC	3	57.65	407217240	Protein of unknown function DUF581	IPR007650	PF04570
extended	3	-	-		Yes	Yes	MLOC_67422.1	HC	3	57.86	407771520	ATPase, F1/V1/A1 complex, alpha/beta subunit, N-terminal;ATPase, F1/V1/A1 complex, alpha/beta subunit, C-terminal;ATPase, F1/V1/A1 complex, alpha/beta subunit, nucleotide-binding domain	IPR004100,IPR000793,IPR000194	PF02874,PF00306,PF00006	GO:0016469	GO:0046034	GO:0015992	GO:0046961	GO:0046933	GO:0015991	GO:0033178	GO:0016820	GO:0005524
extended	3	-	-		Yes	Yes	MLOC_36667.1	HC	3	57.99	407771520	Glycine cleavage system P-protein, N-terminal	IPR020580	PF02347	GO:0055114	GO:0004375
extended	3	-	-		Yes	Yes	AK362306	HC	3	58	407771520	Allinase, C-terminal;EGF-like, alliinase	IPR006948,IPR006947	PTHR11751,PF04864,PF04863,PTHR11751:SF162	GO:0016846
extended	3	-	-		Yes	Yes	MLOC_39198.3	HC	3	58.11	407952560	Domain of unknown function DUF59;ATPase-like, ParA/MinD;Domain of unknown function, DUF971	IPR002744,IPR019591,IPR010376	PF01883,PF10609,PF06155	GO:0055114
extended	3	-	-		Yes	Yes	MLOC_61788.1	HC	3	58.11	408801960	Sulphate transporter/antisigma-factor antagonist STAS;Sulphate transporter	IPR002645,IPR011547	PF01740,PF00916	GO:0005215	GO:0006810	GO:0016021	GO:0055085
extended	3	-	-		Yes	Yes	MLOC_70699.2	LC	3	58.31	409910520	-	-	-	-
extended	3	-	-		Yes	Yes	MLOC_70700.1	LC	3	58.31	409910520	-	-	-	-
extended	3	-	-		Yes	Yes	MLOC_11772.1	HC	3	58.57	409910520	Zinc finger, C3HC4 RING-type;Zinc finger, CHY-type	IPR018957,IPR008913	PF00097,PF05495	GO:0008270
extended	3	-	-		Yes	Yes	MLOC_57417.1	HC	3	58.99	410550360	Heavy metal-associated domain, HMA	IPR006121	PF00403,PTHR22814:SF55,PS50846,PTHR22814	GO:0046872	GO:0030001
extended	3	-	-		Yes	Yes	MLOC_50950.1	HC	3	59.14	411717200	NB-ARC	IPR002182	PF00931	GO:0006915	GO:0005524
extended	3	-	-		Yes	Yes	MLOC_51359.1	HC	3	59.14	411717200	NB-ARC	IPR002182	PF00931	GO:0006915	GO:0005524
extended	3	-	-		Yes	Yes	MLOC_51360.1	LC	3	59.14	411717200	-	-	-	-
extended	3	-	-		Yes	Yes	MLOC_59598.2	HC	3	59.14	411717200			PTHR23416,PTHR23416:SF15
extended	3	-	-		Yes	Yes	MLOC_60691.6	HC	3	59.14	411717200	Hexokinase, N-terminal;Hexokinase, C-terminal	IPR022672,IPR022673	PF00349,PF03727	GO:0005524	GO:0005975	GO:0016773	GO:0005975	GO:0005524	GO:0016773
extended	3	-	-		Yes	Yes	MLOC_61949.4	HC	3	59.14	411717200	Malic enzyme, NAD-binding;Malic enzyme, N-terminal	IPR012302,IPR012301	PF03949,PF00390	GO:0055114	GO:0016616	GO:0051287	GO:0016616	GO:0055114
extended	3	-	-		Yes	Yes	MLOC_74532.1	HC	3	59.14	411717200	Serine acetyltransferase, N-terminal;Hexapeptide transferase, conserved site	IPR010493,IPR018357	SM00971,PS00101,PF06426,PTHR23416,PTHR23416:SF18	GO:0006535	GO:0005737	GO:0009001	GO:0016740
extended	3	-	-		Yes	Yes	MLOC_74707.2	HC	3	59.14	411717200	Hyaluronan/mRNA-binding protein;Stm1, N-terminal	IPR006861,IPR019084	PF04774,PF09598
extended	3	-	-		Yes	Yes	MLOC_19742.1	HC	3	59.28	411717200	Leucine-rich repeat;Serine-threonine/tyrosine-protein kinase	IPR001611,IPR001245	PF00560,PF07714	GO:0005515	GO:0004672	GO:0006468
extended	3	-	-		Yes	Yes	MLOC_67685.1	LC	3	59.28	411717200	-	-	-	-
extended	3	-	-		Yes	Yes	MLOC_67686.1	HC	3	59.28	411717200	Phosphatase PHOSPHO-type	IPR016965	PTHR20889,PF06888	GO:0016791
extended	3	-	-		Yes	Yes	MLOC_11701.2	HC	3	59.38	412149960	Zinc finger, PHD-finger;Zinc finger, C3HC4 RING-type	IPR019787,IPR018957	PF00628,PF00097	GO:0005515
extended	3	-	-		Yes	Yes	MLOC_65930.1	LC	3	59.42	412149960	-	-	-	-
extended	3	-	-		Yes	Yes	MLOC_63404.1	HC	3	59.42	412530640	Regulator of chromosome condensation, RCC1	IPR000408	PF00415
extended	3	-	-		Yes	Yes	MLOC_63920.1	HC	3	59.42	414329880	WD40 repeat, subgroup;Serine/threonine-protein kinase-like domain	IPR019781,IPR017442	PF00400,PF00069	GO:0006468	GO:0005524	GO:0004672
extended	3	-	-		Yes	Yes	MLOC_15525.1	HC	3	59.45	414329880	Phosphoribosyltransferase	IPR000836	PTHR10210:SF32,PTHR10210,PF00156	GO:0009116
extended	3	-	-		Yes	Yes	MLOC_81708.1	LC	3	59.53	414329880	-	-	-	-
alignment	3	59.63	415604600	525056378	No	No	MLOC_78509.1	LC	3	59.63	414682040	-	-	-	-
alignment	3	59.63	415604600		No	No	MLOC_78510.1	LC	3	59.63	414682040	-	-	-	-
alignment	3	59.63	415604600		No	No	AK252272.1	HC	3	59.63	415604600	Serine/threonine-protein kinase-like domain	IPR017442	PF00069	GO:0006468	GO:0005524	GO:0004672
alignment	3	59.63	415604600		No	No	AK365474	HC	3	59.63	415604600	-	-	-	-
alignment	3	59.63	415604600		No	No	AK367002	HC	3	59.63	415604600	Protein of unknown function DUF92, TMEM19	IPR002794	PTHR13353,PF01940	GO:0016021
alignment	3	59.63	415604600		No	No	MLOC_73535.1	HC	3	59.63	415604600	Proteinase inhibitor I9, subtilisin propeptide	IPR010259	PF05922	GO:0042802	GO:0043086	GO:0004252
alignment	3	59.63	415604600		No	No	MLOC_7638.1	HC	3	59.63	415604600	Leucine-rich repeat	IPR001611	PF00560	GO:0005515
alignment	3	59.63	415604600		No	No	AK374041	LC	3	59.63	415826560	-	-	-	-
alignment	3	59.63	415604600		No	No	MLOC_15270.1	HC	3	59.63	415826560	-	-	-	-
alignment	3	59.63	415604600		No	No	MLOC_20381.2	HC	3	59.63	415826560	Dymeclin	IPR019142	PF09742
alignment	3	59.63	415604600		No	No	MLOC_28020.6	HC	3	59.63	415826560	-	-	-	-
alignment	3	59.63	415604600		No	No	MLOC_64456.1	HC	3	59.63	415826560	-	-	-	-
alignment	3	59.63	415604600		No	No	AK357357	HC	3	59.63	417066560	-	-	-	-
alignment	3	59.63	415604600		No	No	MLOC_13243.1	HC	3	59.63	417066560	DNA polymerase III, gamma subunit, domain III	IPR022754	PF12169	GO:0003887
alignment	3	59.63	415604600		No	No	MLOC_68915.2	HC	3	59.63	417066560	Aminoacyl-tRNA synthetase, class Ic	IPR002305	PF00579	GO:0005737	GO:0004812	GO:0006418	GO:0005524	GO:0000166
alignment	3	59.63	415604600		No	No	MLOC_68916.1	LC	3	59.63	417066560	-	-	-	-
alignment	3	59.63	415604600		No	No	MLOC_7420.1	HC	3	59.63	417066560	Heat shock protein DnaJ, N-terminal	IPR001623	PF00226	GO:0031072
alignment	3	59.63	415604600		No	No	MLOC_7422.1	HC	3	59.63	417066560	-	-	-	-
alignment	3	59.63	415604600		No	No	AK357715	HC	3	59.63	420906840	-	-	-	-
alignment	3	59.63	415604600		No	No	AK366869	HC	3	59.63	420906840	Cof protein;Uncharacterised protein family UPF0054, metalloprotease YbeY, predicted;HAD superfamily hydrolase-like, type 3	IPR000150,IPR002036,IPR013200	PS01229,PF02130,PF08282,PTHR10000,PS01228	GO:0008152	GO:0016787	GO:0046872
alignment	3	59.63	415604600		No	No	AK366942	HC	3	59.63	420906840	Dual specificity phosphatase, catalytic domain;Protein-tyrosine phosphatase, active site;Dual specificity phosphatase, subgroup, catalytic domain;Protein-tyrosine/Dual-specificity phosphatase	IPR000340,IPR016130,IPR020422,IPR000387	PF00782,PS00383,PS50054,PS50056,PTHR10159:SF5,PTHR10159	GO:0008138	GO:0006470	GO:0016791	GO:0016311	GO:0004725	GO:0016311	GO:0016791
alignment	3	59.63	415604600		No	No	AK367813	HC	3	59.63	420906840	Peptidase M28;Transferrin receptor-like, dimerisation domain;Protease-associated domain, PA	IPR007484,IPR007365,IPR003137	PF04389,PTHR10404,PTHR10404:SF15,PF04253,PF02225	GO:0008233	GO:0006508
alignment	3	59.63	415604600		No	No	AK369429	HC	3	59.63	420906840	NADH:ubiquinone oxidoreductase intermediate-associated protein 30	IPR013857	PTHR13194,PF08547
alignment	3	59.63	415604600		No	No	MLOC_13503.1	LC	3	59.63	420906840	-	-	-	-
alignment	3	59.63	415604600		No	No	MLOC_13504.3	HC	3	59.63	420906840	AUX/IAA protein	IPR003311	PF02309	GO:0006355	GO:0005634
alignment	3	59.63	415604600		No	No	MLOC_14821.1	HC	3	59.63	420906840	DNA-binding WRKY	IPR003657	PF03106	GO:0003700	GO:0006355	GO:0043565
alignment	3	59.63	415604600		No	No	MLOC_18610.1	HC	3	59.63	420906840	Serine/threonine-protein kinase-like domain	IPR017442	PF00069	GO:0006468	GO:0005524	GO:0004672
alignment	3	59.63	415604600		No	No	MLOC_34695.1	HC	3	59.63	420906840	-	-	-	-
alignment	3	59.63	415604600		No	No	MLOC_4410.1	HC	3	59.63	420906840	Aminotransferase-like, plant mobile domain	IPR019557	PF10536
alignment	3	59.63	415604600		No	No	MLOC_55468.2	HC	3	59.63	420906840	Phosphofructokinase domain	IPR000023	PF00365	GO:0003872	GO:0006096	GO:0005945
alignment	3	59.63	415604600		No	No	MLOC_64502.1	HC	3	59.63	420906840	Malic enzyme, N-terminal;Malic enzyme, conserved site;Malic enzyme, NAD-binding;Malic oxidoreductase	IPR012301,IPR015884,IPR012302,IPR001891	PF00390,PS00331,PTHR23406:SF2,SM00919,PF03949,PTHR23406,PR00072	GO:0016616	GO:0055114	GO:0016491	GO:0046872	GO:0055114	GO:0055114	GO:0016616	GO:0051287	GO:0016619	GO:0004470	GO:0055114	GO:0006108
alignment	3	59.63	415604600		No	No	MLOC_64503.1	HC	3	59.63	420906840	Peptidase S16, lon N-terminal	IPR003111	PF02190,PTHR14255	GO:0006508	GO:0004176
alignment	3	59.63	415604600		No	No	MLOC_66888.1	HC	3	59.63	420906840	Transferrin receptor-like, dimerisation domain;Protease-associated domain, PA;Peptidase M28	IPR007365,IPR003137,IPR007484	PF04253,PF02225,PF04389	GO:0008233	GO:0006508
alignment	3	59.63	415604600		No	No	MLOC_68083.6	HC	3	59.63	420906840	IQ motif, EF-hand binding site	IPR000048	PTHR25370:SF172,SM00015,PTHR25370,PF00612,PS50096	GO:0005515
alignment	3	59.63	415604600		No	No	MLOC_69588.2	HC	3	59.63	420906840	Aminotransferase, class I/classII	IPR004839	PF00155	GO:0030170	GO:0009058	GO:0016769
alignment	3	59.63	415604600		No	No	MLOC_7433.1	HC	3	59.63	420906840	Protein of unknown function DUF584	IPR007608	PF04520
alignment	3	59.63	415604600		No	No	MLOC_76086.1	HC	3	59.63	420906840	tRNA/rRNA methyltransferase, SpoU;RNA 2-O ribose methyltransferase, substrate binding	IPR001537,IPR013123	PF00588,PF08032	GO:0008173	GO:0006396	GO:0003723	GO:0008168
alignment	3	59.63	415604600		No	No	MLOC_77452.2	HC	3	59.63	420906840	-	-	-	-
alignment	3	59.63	415604600		No	No	MLOC_77453.1	LC	3	59.63	420906840	-	-	-	-
extended	3	-	-		Yes	Yes	AK251328.1	HC	3	59.74	421529320	Proteasome, alpha-subunit, conserved site;Proteasome, subunit alpha/beta	IPR000426,IPR001353	PF10584,PF00227	GO:0019773	GO:0004175	GO:0006511	GO:0004298	GO:0051603	GO:0005839
extended	3	-	-		Yes	Yes	AK366039	HC	3	59.74	421529320	ABC transporter-like;ABC transporter, conserved site;ATPase, AAA+ type, core;ABC transporter, integral membrane type 1;ABC transporter, transmembrane domain	IPR003439,IPR017871,IPR003593,IPR017940,IPR001140	PF00005,PS00211,PTHR24221,SM00382,PTHR24221:SF96,PS50929,PS50893,PF00664	GO:0016887	GO:0005524	GO:0000166	GO:0017111	GO:0016021	GO:0055085	GO:0006810	GO:0005524	GO:0042626
extended	3	-	-		Yes	Yes	MLOC_5109.1	HC	3	59.74	421529320	Transcriptional factor B3	IPR003340	PF02362	GO:0006355	GO:0003677
extended	3	-	-		Yes	Yes	MLOC_54588.1	HC	3	59.92	423494720	Methyltransferase small	IPR007848	PTHR12843,PF05175	GO:0008168
extended	3	-	-		Yes	Yes	MLOC_54589.1	HC	3	59.92	423494720	WD40 repeat, subgroup;WD40 repeat 2;WD40 repeat;WD40 repeat, conserved site;WD40-repeat-containing domain;G-protein beta WD-40 repeat	IPR019781,IPR019782,IPR001680,IPR019775,IPR017986,IPR020472	PF00400,PS50082,SM00320,PTHR19868,PS00678,PS50294,PR00320	GO:0005515
extended	3	-	-		Yes	Yes	MLOC_54590.1	HC	3	59.92	423494720	Zinc finger, C3HC4 RING-type;Zinc finger, RING-CH-type;Protein of unknown function DUF3675	IPR018957,IPR011016,IPR022143	PF00097,PS51292,PF12428,SM00744,PTHR23012	GO:0008270
extended	3	-	-		Yes	Yes	MLOC_65219.1	HC	3	59.92	423494720	-	-	-	-
extended	3	-	-		Yes	Yes	AK365618	HC	3	60.52	423494720	FAD-binding, type 1;Oxidoreductase FAD/NAD(P)-binding	IPR003097,IPR001433	PF00667,PF00175	GO:0055114	GO:0016491	GO:0016491	GO:0055114
extended	3	-	-		Yes	Yes	AK375311	HC	3	60.52	423494720	BURP	IPR004873	PS51277,PF03181
extended	3	-	-		Yes	Yes	AK360813	LC	3	60.59	423494720	-	-	-	-
extended	3	-	-		Yes	Yes	AK376910	HC	3	60.66	423494720	Uncharacterised protein family UPF0497, trans-membrane plant	IPR006702	PTHR11615,PF04535,PTHR11615:SF33
extended	3	-	-		Yes	Yes	MLOC_7991.1	LC	3	60.66	423494720	-	-	-	-
extended	3	-	-		Yes	Yes	MLOC_7992.1	LC	3	60.66	423494720	-	-	-	-
extended	3	-	-		Yes	Yes	AK354337	HC	3	60.69	423494720	X8;Glycoside hydrolase, family 17	IPR012946,IPR000490	PTHR16631,SM00768,PF07983,PF00332	GO:0004553	GO:0005975
extended	3	-	-		Yes	Yes	AK355685	HC	3	60.69	423494720	Domain of unknown function DUF623	IPR006458	PF04844
extended	3	-	-		Yes	Yes	AK367109	HC	3	60.69	423494720	Leucine-rich repeat-containing N-terminal, type 2;Leucine-rich repeat;Serine/threonine-protein kinase-like domain;Protein kinase, catalytic domain;Protein kinase, ATP binding site;Serine/threonine-protein kinase, active site	IPR013210,IPR001611,IPR017442,IPR000719,IPR017441,IPR008271	PTHR24420,PF08263,PF00560,PR00019,PF00069,PS50011,PS00107,PS00108,PTHR24420:SF789	GO:0005515	GO:0006468	GO:0005524	GO:0004672	GO:0004672	GO:0006468	GO:0005524	GO:0005524	GO:0006468	GO:0004674
extended	3	-	-		Yes	Yes	MLOC_2809.1	LC	3	60.69	423494720	-	-	-	-
extended	3	-	-		Yes	Yes	MLOC_2810.1	LC	3	60.69	423494720	-	-	-	-
extended	3	-	-		Yes	Yes	MLOC_2812.1	LC	3	60.69	423494720	-	-	-	-
extended	3	-	-		Yes	Yes	MLOC_2813.1	LC	3	60.69	423494720	-	-	-	-
extended	3	-	-		Yes	Yes	AK252342.1	HC	3	60.84	423494720	-	-	-	-
extended	3	-	-		Yes	Yes	AK373144	HC	3	60.84	423494720	-	-	-	-
extended	3	-	-		Yes	Yes	AK363457	HC	3	60.84	425819720	Ferric reductase, NAD binding;EF-HAND 2;FAD-binding 8;Flavoprotein transmembrane component;NADPH oxidase Respiratory burst;Ferredoxin reductase-type FAD-binding domain;Cytochrome b245, heavy chain;EF-Hand 1, calcium-binding site	IPR013121,IPR018249,IPR013112,IPR013130,IPR013623,IPR017927,IPR000778,IPR018247	PF08030,PTHR11972,PS50222,PF08022,PF01794,PF08414,PTHR11972:SF5,PS51384,PR00466,PS00018	GO:0055114	GO:0016491	GO:0016491	GO:0055114	GO:0016491	GO:0050660	GO:0005506	GO:0009055	GO:0016021	GO:0055114	GO:0050664	GO:0004601
extended	3	-	-		Yes	Yes	AK367346	HC	3	60.84	425819720	UDP-glucuronosyl/UDP-glucosyltransferase	IPR002213	PS00375,PF00201,PTHR11926:SF15,PTHR11926	GO:0016758	GO:0008152
extended	3	-	-		Yes	Yes	AK369917	HC	3	60.84	425819720	UDP-glucuronosyl/UDP-glucosyltransferase	IPR002213	PTHR11926:SF15,PS00375,PF00201,PTHR11926	GO:0016758	GO:0008152
extended	3	-	-		Yes	Yes	AK372219	HC	3	60.84	425819720	UDP-glucuronosyl/UDP-glucosyltransferase	IPR002213	PS00375,PF00201,PTHR11926,PTHR11926:SF15	GO:0016758	GO:0008152
extended	3	-	-		Yes	Yes	AK374729	HC	3	60.84	425819720	Prenyltransferase/squalene oxidase	IPR001330	PTHR11774:SF6,PF00432,PTHR11774	GO:0003824
extended	3	-	-		Yes	Yes	MLOC_66675.1	HC	3	60.84	425819720	UDP-glucuronosyl/UDP-glucosyltransferase	IPR002213	PF00201,PTHR11926:SF15,PTHR11926,PS00375	GO:0016758	GO:0008152
extended	3	-	-		Yes	Yes	MLOC_67139.1	HC	3	60.84	425819720	Pentatricopeptide repeat	IPR002885	PF01535
extended	3	-	-		Yes	Yes	MLOC_67565.1	HC	3	60.84	425819720	Peptidase C48, SUMO/Sentrin/Ubl1	IPR003653	PF02902	GO:0008234	GO:0006508
extended	3	-	-		Yes	Yes	MLOC_72589.5	HC	3	60.84	425819720	Ribosomal protein L20	IPR005813	PF00453	GO:0006412	GO:0003735	GO:0019843	GO:0005622	GO:0005840
extended	3	-	-		Yes	Yes	MLOC_74744.1	HC	3	60.84	425819720	Proteinase inhibitor I25, cystatin, conserved site;Proteinase inhibitor I25, cystatin;Proteinase inhibitor I25, cystatin, conserved region	IPR018073,IPR000010,IPR020381	PTHR11413:SF31,PS00287,PF00031,SM00043,PTHR11413,PD001231	GO:0004869
extended	3	-	-		Yes	Yes	MLOC_68455.1	LC	3	60.91	425819720	-	-	-	-
extended	3	-	-		Yes	Yes	MLOC_69022.1	LC	3	61.15	425819720	-	-	-	-
extended	3	-	-		Yes	Yes	MLOC_76894.1	HC	3	61.65	426113600	Reticulon	IPR003388	PS50845,PF02453,PTHR10994	GO:0005783
extended	3	-	-		Yes	Yes	MLOC_55260.1	LC	3	61.76	426113600	-	-	-	-
extended	3	-	-		Yes	Yes	MLOC_55261.1	HC	3	61.76	426113600	Signal transduction histidine kinase, phosphotransfer (Hpt) domain	IPR008207	PF01627	GO:0000160	GO:0004871
extended	3	-	-		Yes	Yes	MLOC_79446.2	HC	3	61.76	426113600	-	-	-	-
extended	3	-	-		Yes	Yes	MLOC_65871.1	LC	3	61.83	426113600	-	-	-	-
extended	3	-	-		Yes	Yes	MLOC_77046.1	LC	3	61.83	426113600	-	-	-	-
extended	3	-	-		Yes	Yes	MLOC_72364.1	LC	3	61.83	426657960	-	-	-	-
extended	3	-	-		Yes	Yes	MLOC_36640.2	HC	3	61.83	426113600	-	-	-	-
extended	3	-	-		Yes	Yes	MLOC_54950.1	HC	3	61.83	426657960	DNA-binding WRKY	IPR003657	PF03106	GO:0003700	GO:0006355	GO:0043565
extended	3	-	-		Yes	Yes	MLOC_72363.1	HC	3	61.83	426657960	-	-	-	-
extended	3	-	-		Yes	Yes	AK368043	HC	3	61.86	426657960	Serine/threonine-protein kinase, active site;Serine/threonine-protein kinase-like domain;Protein kinase, catalytic domain;NAF domain;Serine/threonine-protein kinase domain;Protein kinase, ATP binding site;NAF/FISL domain	IPR008271,IPR017442,IPR000719,IPR004041,IPR002290,IPR017441,IPR018451	PS00108,PF00069,PS50011,PF03822,SM00220,PTHR24346,PS00107,PS50816,PTHR24346:SF45	GO:0006468	GO:0004674	GO:0006468	GO:0005524	GO:0004672	GO:0004672	GO:0006468	GO:0005524	GO:0007165	GO:0005524	GO:0004674	GO:0006468
extended	3	-	-		Yes	Yes	AK367964	HC	3	61.9	426657960	Protein kinase, ATP binding site;Protein kinase, catalytic domain;Serine/threonine-protein kinase, active site;Serine/threonine-protein kinase-like domain	IPR017441,IPR000719,IPR008271,IPR017442	PTHR11909,PS00107,PS50011,PS00108,PTHR11909:SF20,PF00069	GO:0005524	GO:0004672	GO:0006468	GO:0005524	GO:0006468	GO:0004674	GO:0006468	GO:0005524	GO:0004672
extended	3	-	-		Yes	Yes	AK368776	HC	3	61.9	426657960	Protein of unknown function DUF3615	IPR022059	PF12274
extended	3	-	-		Yes	Yes	MLOC_54094.1	HC	3	61.9	426657960	Hexokinase;Hexokinase, N-terminal;Hexokinase, conserved site;Hexokinase, C-terminal	IPR001312,IPR022672,IPR019807,IPR022673	PR00475,PF00349,PTHR19443,PS00378,PF03727	GO:0005524	GO:0005975	GO:0016773	GO:0006096	GO:0004396	GO:0005524	GO:0005975	GO:0005524	GO:0016773
extended	3	-	-		Yes	Yes	MLOC_58724.1	LC	3	61.9	426657960	-	-	-	-
extended	3	-	-		Yes	Yes	MLOC_58725.1	HC	3	61.9	426657960	Zinc finger, GATA-type	IPR000679	PS50114,PS00344,SM00401,PTHR10071,PF00320,PTHR10071:SF113	GO:0008270	GO:0006355	GO:0043565	GO:0003700
extended	3	-	-		Yes	Yes	MLOC_74647.1	HC	3	61.9	426657960	UDP-glucuronosyl/UDP-glucosyltransferase	IPR002213	PS00375,PTHR11926:SF15,PTHR11926,PF00201	GO:0016758	GO:0008152
extended	3	-	-		Yes	Yes	AK366490	HC	3	61.9	427256880	Oligosaccharyl transferase, STT3 subunit	IPR003674	PF02516	GO:0004576	GO:0006486	GO:0016020
extended	3	-	-		Yes	Yes	MLOC_50979.1	HC	3	61.9	427256880	ATPase, AAA-2;ATPase, AAA-type, core;Clp ATPase, C-terminal;Clp, N-terminal	IPR013093,IPR003959,IPR019489,IPR004176	PF07724,PF00004,PF10431,PF02861	GO:0005524	GO:0019538
extended	3	-	-		Yes	Yes	MLOC_81988.1	LC	3	61.9	427256880	-	-	-	-
extended	3	-	-		Yes	Yes	MLOC_81989.1	HC	3	61.9	427256880	Serine/threonine-protein kinase-like domain;Serine/threonine-protein kinase, active site;Protein kinase, ATP binding site;Protein kinase, catalytic domain	IPR017442,IPR008271,IPR017441,IPR000719	PTHR24420,PR01217,PF00069,PS00108,PTHR24420:SF644,PS00107,PS50011	GO:0006468	GO:0005524	GO:0004672	GO:0006468	GO:0004674	GO:0005524	GO:0004672	GO:0006468	GO:0005524
extended	3	-	-		Yes	Yes	AK371681	HC	3	61.9	428699000	Nuclear pore complex protein, Nucleoporin Nup85-like	IPR011502	PTHR13373,PTHR13373:SF15,PF07575
extended	3	-	-		Yes	Yes	MLOC_61686.3	HC	3	61.9	428699000	Protein kinase, catalytic domain;Serine-threonine/tyrosine-protein kinase;Serine/threonine-protein kinase, active site	IPR000719,IPR001245,IPR008271	PS50011,PR00109,PTHR23257:SF81,PS00108,PTHR23257,PF07714	GO:0004672	GO:0006468	GO:0005524	GO:0004672	GO:0006468	GO:0006468	GO:0004674
extended	3	-	-		Yes	Yes	MLOC_74852.1	HC	3	61.9	428699000	Glycoside hydrolase, family 5, conserved site;Glycoside hydrolase, family 5	IPR018087,IPR001547	PS00659,PF00150	GO:0005975	GO:0004553	GO:0004553	GO:0005975
extended	3	-	-		Yes	Yes	AK366462	HC	3	61.9	429133000	Kinesin, motor domain;Calponin homology domain	IPR001752,IPR001715	SM00129,PF00307,PTHR24115,SM00033,PTHR24115:SF135,PR00380,PS50021,PF00225,PS50067	GO:0005524	GO:0003777	GO:0007018	GO:0005515
extended	3	-	-		Yes	Yes	MLOC_6164.1	HC	3	61.9	429133000	-	-	-	-
extended	3	-	-		Yes	Yes	MLOC_24331.1	LC	3	61.9	429593040	-	-	-	-
extended	3	-	-		Yes	Yes	MLOC_2480.1	HC	3	62.04	429593040	Amidohydrolase 1	IPR006680	PF01979	GO:0016787
extended	3	-	-		Yes	Yes	AK370211	HC	3	62.08	429593040	Protein of unknown function DUF155	IPR003734	PF02582,PTHR16255
extended	3	-	-		Yes	Yes	AK373326	HC	3	62.08	429593040	Protein of unknown function DUF567	IPR007612	PF04525
extended	3	-	-		Yes	Yes	MLOC_4365.1	HC	3	62.08	429593040	Protein of unknown function DUF616	IPR006852	PF04765
extended	3	-	-		Yes	Yes	MLOC_75884.4	HC	3	62.08	429593040	-	-	-	-
extended	3	-	-		Yes	Yes	AK355537	HC	3	62.54	429593040	Serine/threonine-protein kinase-like domain;Protein kinase, catalytic domain	IPR017442,IPR000719	PF00069,PS50011,PTHR23257:SF89,PTHR23257	GO:0006468	GO:0005524	GO:0004672	GO:0004672	GO:0006468	GO:0005524
extended	3	-	-		Yes	Yes	MLOC_11811.1	LC	3	62.54	429593040	-	-	-	-
extended	3	-	-		Yes	Yes	AK363863	HC	3	62.68	430452360	Membrane attack complex component/perforin (MACPF) domain	IPR020864	PF01823,PTHR19324:SF4,PS51412,PTHR19324
extended	3	-	-		Yes	Yes	AK251701.1	HC	3	62.68	434379440	Zinc finger, PHD-finger;Homeobox	IPR019787,IPR001356	PF00628,PF00046	GO:0005515	GO:0003700	GO:0043565	GO:0006355
extended	3	-	-		Yes	Yes	AK356088	HC	3	62.68	434379440	Tic22-like	IPR007378	PF04278
extended	3	-	-		Yes	Yes	AK360282	HC	3	62.68	434379440	Domain of unknown function DUF250;Drug/metabolite transporter	IPR004853,IPR000620	PTHR11132,PF03151,PF00892	GO:0016020
extended	3	-	-		Yes	Yes	AK365079	HC	3	62.68	434379440	Cellulose synthase;Zinc finger, RING-type	IPR005150,IPR001841	PF03552,PTHR13301:SF23,SM00184,PTHR13301	GO:0016020	GO:0016760	GO:0030244	GO:0008270	GO:0005515
extended	3	-	-		Yes	Yes	AK367643	HC	3	62.68	434379440	DNA-binding WRKY	IPR003657	PF03106	GO:0003700	GO:0006355	GO:0043565
extended	3	-	-		Yes	Yes	AK369068	HC	3	62.68	434379440	Dynamin;Dynamin, GTPase domain	IPR022812,IPR001401	PTHR11566,PTHR11566:SF62,PR00195,SM00053,PF00350	GO:0005525	GO:0003924
extended	3	-	-		Yes	Yes	AK372402	HC	3	62.68	434379440	-	-	-	-
extended	3	-	-		Yes	Yes	AK373983	HC	3	62.68	434379440	Tesmin/TSO1-like, CXC	IPR005172	PTHR12446,PF03638,PTHR12446:SF7
extended	3	-	-		Yes	Yes	MLOC_10748.1	HC	3	62.68	434379440	ABC-2 type transporter;Plant PDR ABC transporter associated;ABC transporter-like	IPR013525,IPR013581,IPR003439	PF01061,PF08370,PF00005	GO:0016020	GO:0016887	GO:0005524
extended	3	-	-		Yes	Yes	MLOC_20614.2	HC	3	62.68	434379440	Protein of unknown function DUF1264	IPR010686	PF06884
extended	3	-	-		Yes	Yes	MLOC_36688.1	HC	3	62.68	434379440	Leucine-rich repeat	IPR001611	PF00560	GO:0005515
extended	3	-	-		Yes	Yes	MLOC_5072.1	HC	3	62.68	434379440	VQ	IPR008889	PF05678
extended	3	-	-		Yes	Yes	MLOC_54304.1	HC	3	62.68	434379440	Small GTPase superfamily;Small GTPase superfamily, Rab type	IPR001806,IPR003579	PTHR24073,PTHR24073:SF260,PS51419,PF00071,SM00175,PR00449	GO:0007264	GO:0005525	GO:0005525	GO:0015031	GO:0007264
extended	3	-	-		Yes	Yes	MLOC_54334.1	HC	3	62.68	434379440	-	-	-	-
extended	3	-	-		Yes	Yes	MLOC_56649.4	HC	3	62.68	434379440	Domain of unknown function DUF814	IPR008532	PF05670
extended	3	-	-		Yes	Yes	MLOC_63142.3	HC	3	62.68	434379440	RNA-binding S4	IPR002942	PTHR10436:SF44,PTHR10436,SM00363,PS50889,PF01479	GO:0003723
extended	3	-	-		Yes	Yes	MLOC_64398.1	HC	3	62.68	434379440	Ribosomal protein L13	IPR005822	PF00572	GO:0003735	GO:0006412	GO:0005840
extended	3	-	-		Yes	Yes	MLOC_69779.1	LC	3	62.68	434379440	-	-	-	-
extended	3	-	-		Yes	Yes	MLOC_71706.1	LC	3	62.68	434379440	-	-	-	-
extended	3	-	-		Yes	Yes	MLOC_71707.1	LC	3	62.68	434379440	-	-	-	-
extended	3	-	-		Yes	Yes	MLOC_74270.1	HC	3	62.68	434379440	Heat shock factor (HSF)-type, DNA-binding	IPR000232	PTHR10015,PTHR10015:SF7,SM00415,PR00056,PF00447,PS00434	GO:0003700	GO:0005634	GO:0006355	GO:0043565
extended	3	-	-		Yes	Yes	MLOC_81502.2	HC	3	62.68	434379440	Glycosyl transferase, family 20;Trehalose-phosphatase	IPR001830,IPR003337	PF00982,PF02358,PTHR10788	GO:0005992	GO:0003824	GO:0003824	GO:0005992
extended	3	-	-		Yes	Yes	MLOC_37750.1	LC	3	62.75	434379440	-	-	-	-
extended	3	-	-		Yes	Yes	MLOC_73133.1	LC	3	62.75	434379440	-	-	-	-
extended	3	-	-		Yes	Yes	MLOC_5131.1	LC	3	62.96	434379440	-	-	-	-
extended	3	-	-		Yes	Yes	MLOC_5132.1	LC	3	62.96	434379440	-	-	-	-
extended	3	-	-		Yes	Yes	MLOC_5133.1	HC	3	62.96	434379440	Casein kinase substrate, phosphoprotein PP28	IPR019380	PF10252
extended	3	-	-		Yes	Yes	AK354806	HC	3	62.96	435824040	Transcriptional factor B3;Auxin response factor	IPR003340,IPR010525	PF02362,PS50863,PF06507	GO:0006355	GO:0003677	GO:0005634	GO:0006355	GO:0009725	GO:0003677
extended	3	-	-		Yes	Yes	AK374444	HC	3	62.96	435824040	Domain of unknown function DUF1084	IPR009457	PF06454
extended	3	-	-		Yes	Yes	MLOC_53554.2	HC	3	62.96	435824040	-	-	-	-
extended	3	-	-		Yes	Yes	MLOC_59187.1	HC	3	62.96	435824040	-	-	-	-
extended	3	-	-		Yes	Yes	MLOC_72045.2	HC	3	62.96	435824040	Calcium/calmodulin-dependent protein kinase II, association-domain;UvrB/UvrC protein	IPR013543,IPR001943	PF08332,PF02151	GO:0005516	GO:0006468	GO:0004683	GO:0004518	GO:0006289	GO:0003677
extended	3	-	-		Yes	Yes	MLOC_75554.1	HC	3	62.96	435824040	-	-	-	-
extended	3	-	-		Yes	Yes	MLOC_75555.1	HC	3	62.96	435824040	ATPase, F1 complex, epsilon subunit, mitochondrial	IPR006721	PTHR12448,PF04627	GO:0046933	GO:0015986	GO:0000275	GO:0046961
extended	3	-	-		Yes	Yes	MLOC_73877.1	LC	3	63.08	435824040	-	-	-	-
extended	3	-	-		Yes	Yes	AK363328	LC	3	63.16	435824040	-	-	-	-
extended	3	-	-		Yes	Yes	MLOC_11267.1	HC	3	63.25	437529040	Glycosyl transferase, family 48	IPR003440	PF02364	GO:0006075	GO:0003843	GO:0016020	GO:0000148
extended	3	-	-		Yes	Yes	MLOC_58368.2	HC	3	63.25	437529040	Protein of unknown function DUF1421	IPR010820	PF07223
extended	3	-	-		Yes	Yes	AK363559	HC	3	63.3	437529040	-	-	-	-
extended	3	-	-		Yes	Yes	MLOC_62694.1	LC	3	63.35	437529040	-	-	-	-
extended	3	-	-		Yes	Yes	MLOC_62695.1	LC	3	63.35	437529040	-	-	-	-
aMarker located in the extended ±4cM intervall (extended), position of best sequence alignment (alignment)

## Sheet: QPs.3H-2
Supporting Information 2 | Alignment of markers with DR >50% using BARLEYMAP
Markera	Chr	cM	Base pairs	barlex_pos_bp	Multiple positions	Other alignments	Gene	HC/LC	Chr	cM	Bp	Description	InterPro	Signatures	GO terms									total of relevant GO terms:
extended	3	-	-		Yes	Yes	MLOC_80659.1	LC	3	119.52	522023880	-	-	-	-
extended	3	-	-		Yes	Yes	MLOC_36572.2	HC	3	119.52	522023880	-	-	-	-																GO:0000166	name: nucleotide binding	namespace: molecular_function
extended	3	-	-		Yes	Yes	AK370352	HC	3	120.14	522848480	Transcription factor, MADS-box	IPR002100	PTHR11945,PS50066,PR00404,PTHR11945:SF19,PF00319,SM00432	GO:0043565	GO:0005634	GO:0006355	GO:0003700													GO:0019001	name: guanyl nucleotide binding	namespace: molecular_function
extended	3	-	-		Yes	Yes	MLOC_38000.1	HC	3	120.14	522848480	Endonuclease/exonuclease/phosphatase	IPR005135	PF03372																	GO:0050660	name: flavin adenine dinucleotide binding	namespace: molecular_function
extended	3	-	-		Yes	Yes	MLOC_5795.1	LC	3	120.57	522848480	-	-	-	-																GO:0004096	name: catalase activity	namespace: molecular_function
extended	3	-	-		Yes	Yes	MLOC_5796.1	LC	3	120.57	522848480	-	-	-	-																GO:0006952	name: defense response	namespace: biological_process
extended	3	-	-		Yes	Yes	MLOC_23597.1	LC	3	120.89	522848480	-	-	-	-																GO:0050832	name: defense response to fungus	namespace: biological_process
extended	3	-	-		Yes	Yes	MLOC_12642.1	HC	3	122.03	522848480	-	-	-	-																GO:0004568	name: chitinase activity	namespace: molecular_function
extended	3	-	-		Yes	Yes	MLOC_5412.1	HC	3	122.03	522848480	Alcohol dehydrogenase, C-terminal;Alcohol dehydrogenase GroES-like;Alcohol dehydrogenase, zinc-type, conserved site;Alcohol dehydrogenase superfamily, zinc-type	IPR013149,IPR013154,IPR002328,IPR002085	PF00107,PF08240,PS00059,PTHR11695:SF285,PTHR11695	GO:0008270	GO:0055114	GO:0016491	GO:0055114	GO:0016491	GO:0016491	GO:0055114	GO:0008270	GO:0008270	GO:0016491	GO:0055114						GO:0004601	name: peroxidase activity	namespace: molecular_function
extended	3	-	-		Yes	Yes	AK252016.1	HC	3	122.03	523215520	Ubiquitin-associated/translation elongation factor EF1B, N-terminal;Ubiquitin-conjugating enzyme, E2	IPR000449,IPR000608	PF00627,PF00179	GO:0005515	GO:0016881															GO:0005777	name: peroxisome	namespace: cellular_component
extended	3	-	-		Yes	Yes	AK356730	HC	3	122.03	523215520	Protein of unknown function DUF962	IPR009305	PF06127																	GO:0006950	name: response to stress	namespace: biological_process
extended	3	-	-		Yes	Yes	AK360285	HC	3	122.03	523215520	Transcription factor TCP subgroup;Transcription factor, TCP	IPR017887,IPR005333	PTHR11584,PS51369,PF03634,PTHR11584:SF275																	GO:0006979	name: response to oxidative stress	namespace: biological_process
extended	3	-	-		Yes	Yes	AK364955	HC	3	122.03	523215520	Transaldolase;Transaldolase, active site	IPR001585,IPR018225	PF00923,PTHR10683,PS01054	GO:0005975																GO:0007186	name: G-protein coupled receptor signaling pathway	namespace: biological_process
extended	3	-	-		Yes	Yes	MLOC_36438.3	HC	3	122.03	523215520	Serine/threonine-protein kinase-like domain	IPR017442	PF00069	GO:0006468	GO:0005524	GO:0004672														GO:0007205	name: protein kinase C-activating G-protein coupled receptor signaling pathway	namespace: biological_process
extended	3	-	-		Yes	Yes	MLOC_57940.1	HC	3	122.03	523215520	Auxin responsive SAUR protein	IPR003676	PF02519																	GO:0008020	name: G-protein coupled photoreceptor activity	namespace: molecular_function
extended	3	-	-		Yes	Yes	MLOC_67837.1	HC	3	122.03	523215520	-	-	-	-																GO:0008262	name: nuclear export signal receptor activity	namespace: molecular_function
extended	3	-	-		Yes	Yes	MLOC_67838.1	HC	3	122.03	523215520	GYF	IPR003169	PF02213	GO:0005515																GO:0004970	name: ionotropic glutamate receptor activity	namespace: molecular_function
extended	3	-	-		Yes	Yes	MLOC_74279.2	HC	3	122.03	523215520	-	-	-	-																GO:0016998	name: cell wall macromolecule catabolic process	namespace: biological_process
extended	3	-	-		Yes	Yes	AK358183	HC	3	122.03	523960760	NB-ARC;Disease resistance protein	IPR002182,IPR000767	PF00931,PTHR23155,PR00364,PTHR23155:SF121	GO:0006915	GO:0005524	GO:0006952														GO:0005618	name: cell wall	namespace: cellular_component
extended	3	-	-		Yes	Yes	MLOC_23760.1	HC	3	122.03	523960760	Glutathione S-transferase, C-terminal;Glutathione S-transferase, N-terminal;Glutathione S-transferase/chloride channel, C-terminal	IPR004046,IPR004045,IPR017933	PTHR11260,PF00043,PF02798,PS50404,PTHR11260:SF16,PS50405	GO:0005515																GO:0042545	name: cell wall modification	namespace: biological_process
extended	3	-	-		Yes	Yes	MLOC_37976.2	HC	3	122.03	523960760	Glycoside hydrolase, family 1	IPR001360	PF00232	GO:0005975	GO:0004553															GO:0042546	name: cell wall biogenesis	namespace: biological_process
extended	3	-	-		Yes	Yes	MLOC_44213.2	HC	3	122.03	523960760	-	-	-	-																GO:0008219	name: cell death	namespace: biological_process
extended	3	-	-		Yes	Yes	MLOC_58744.1	HC	3	122.03	523960760	Transferase	IPR003480	PF02458	GO:0016747																GO:0005035	name: death receptor activity	namespace: molecular_function
extended	3	-	-		Yes	Yes	MLOC_68836.1	HC	3	122.03	523960760	NB-ARC	IPR002182	PF00931	GO:0006915	GO:0005524															GO:0005037	name: obsolete death receptor adaptor protein activity	namespace: molecular_function
extended	3	-	-		Yes	Yes	MLOC_70320.1	HC	3	122.03	523960760	Glutathione S-transferase, N-terminal;Glutathione S-transferase, C-terminal	IPR004045,IPR004046	PF02798,PF00043	GO:0005515																GO:0005038	name: obsolete death receptor interacting protein activity	namespace: molecular_function
extended	3	-	-		Yes	Yes	MLOC_9078.1	HC	3	122.03	523960760	Zinc finger, C3HC4 RING-type	IPR018957	PF00097																	GO:0005039	name: obsolete death receptor-associated factor activity	namespace: molecular_function
extended	3	-	-		Yes	Yes	AK364217	HC	3	122.03	524931680	F-box domain, cyclin-like	IPR001810	SM00256,PS50181,PF00646	GO:0005515																GO:0005040	name: decoy death receptor activity	namespace: molecular_function
extended	3	-	-		Yes	Yes	MLOC_10409.1	LC	3	122.03	522848480	-	-	-	-																GO:0005123	name: death receptor binding	namespace: molecular_function
extended	3	-	-		Yes	Yes	MLOC_32124.1	LC	3	122.03	523215520	-	-	-	-																GO:0010343	name: singlet oxygen-mediated programmed cell death	namespace: biological_process
extended	3	-	-		Yes	Yes	MLOC_32125.1	LC	3	122.03	523215520	-	-	-	-																GO:0010421	name: hydrogen peroxide-mediated programmed cell death	namespace: biological_process
extended	3	-	-		Yes	Yes	MLOC_42117.1	LC	3	122.03	523215520	-	-	-	-																GO:0010623	name: programmed cell death involved in cell development	namespace: biological_process
extended	3	-	-		Yes	Yes	MLOC_48116.1	LC	3	122.03	523215520	-	-	-	-																GO:0010940	name: positive regulation of necrotic cell death	namespace: biological_process
extended	3	-	-		Yes	Yes	MLOC_57939.1	LC	3	122.03	523215520	-	-	-	-																GO:0010941	name: regulation of cell death	namespace: biological_process
extended	3	-	-		Yes	Yes	MLOC_57941.1	LC	3	122.03	523215520	-	-	-	-																GO:0010942	name: positive regulation of cell death	namespace: biological_process
extended	3	-	-		Yes	Yes	MLOC_74278.1	LC	3	122.03	523215520	-	-	-	-																GO:0012501	name: programmed cell death	namespace: biological_process
extended	3	-	-		Yes	Yes	MLOC_74462.1	LC	3	122.03	523215520	-	-	-	-																GO:0012502	name: induction of programmed cell death	namespace: biological_process
extended	3	-	-		Yes	Yes	AK368785	HC	3	122.14	524931680	Aux/IAA-ARF-dimerisation;Auxin response factor;Transcriptional factor B3;AUX/IAA protein	IPR011525,IPR010525,IPR003340,IPR003311	PS50962,PF06507,PS50863,PF02309,PF02362	GO:0046983	GO:0005634	GO:0006355	GO:0009725	GO:0003677	GO:0006355	GO:0003677	GO:0006355	GO:0005634								GO:0016265	name: obsolete death	namespace: biological_process
extended	3	-	-		Yes	Yes	MLOC_74459.1	LC	3	122.31	524931680	-	-	-	-																GO:0012501	name: programmed cell death	namespace: biological_process
extended	3	-	-		Yes	Yes	AK362145	HC	3	122.59	525049480	Glutathione S-transferase, C-terminal;Glutathione S-transferase, N-terminal	IPR004046,IPR004045	PF00043,PF02798	GO:0005515																GO:0006915	name: apoptotic process	namespace: biological_process
extended	3	-	-		Yes	Yes	AK362354	HC	3	122.59	525049480	-	-	-	-																GO:0005524	name: ATP binding	namespace: molecular_function
extended	3	-	-		Yes	Yes	MLOC_19637.1	HC	3	122.59	525049480	UDP-glucuronosyl/UDP-glucosyltransferase	IPR002213	PF00201	GO:0016758	GO:0008152															GO:0004672	name: protein kinase activity	namespace: molecular_function
extended	3	-	-		Yes	Yes	MLOC_20351.2	HC	3	122.59	525049480	-	-	-	-																GO:0005515	protein binding	molecular function
extended	3	-	-		Yes	Yes	MLOC_22069.1	HC	3	122.59	525049480	Glutamine cyclotransferase	IPR007788	PF05096
extended	3	-	-		Yes	Yes	MLOC_3926.1	HC	3	122.59	525049480	Myb, DNA-binding	IPR014778	PF00249
extended	3	-	-		Yes	Yes	MLOC_20741.1	LC	3	122.59	525049480	-	-	-	-
extended	3	-	-		Yes	Yes	MLOC_36827.1	LC	3	122.59	525049480	-	-	-	-
extended	3	-	-		Yes	Yes	MLOC_3927.1	LC	3	122.59	525049480	-	-	-	-
alignment	3	123.23	528175520	652499777	No	No	MLOC_20616.1	LC	3	123.23	525049480	-	-	-	-
extended	3	-	-		Yes	Yes	MLOC_57209.1	HC	3	123.23	525049480	-	-	-	-
extended	3	-	-		Yes	Yes	MLOC_57210.1	HC	3	123.23	525049480	Ribosomal protein L27;Ribosomal protein L27, conserved site	IPR001684,IPR018261	PR00063,PF01016,PTHR15893,PD003114,PS00831	GO:0006412	GO:0005840	GO:0005622	GO:0003735	GO:0006412	GO:0005622	GO:0003735	GO:0005840
extended	3	-	-		Yes	Yes	AK248786.1	HC	3	123.23	528175520	Glycoside hydrolase, family 1	IPR001360	PF00232	GO:0005975	GO:0004553
extended	3	-	-		Yes	Yes	AK250579.1	HC	3	123.23	528175520	Aminotransferase, class I/classII	IPR004839	PF00155	GO:0030170	GO:0009058	GO:0016769
extended	3	-	-		Yes	Yes	AK355112	HC	3	123.23	528175520	Cellular retinaldehyde-binding/triple function, N-terminal;Cellular retinaldehyde-binding/triple function, C-terminal	IPR008273,IPR001251	PTHR10174,PF03765,PTHR10174:SF78,PF00650,PS50191,SM00516
extended	3	-	-		Yes	Yes	AK355118	HC	3	123.23	528175520	Helix-loop-helix DNA-binding domain	IPR001092	PF00010,PTHR23042:SF24,PS50888,PTHR23042,SM00353	GO:0006355
extended	3	-	-		Yes	Yes	AK360724	HC	3	123.23	528175520	Protein kinase, catalytic domain;Protein kinase, ATP binding site;EGF-like calcium-binding, conserved site;Serine/threonine-protein kinase-like domain;Serine/threonine-protein kinase, active site;Epidermal growth factor-like	IPR000719,IPR017441,IPR018097,IPR017442,IPR008271,IPR006210	PTHR24420:SF444,PS50011,PS00107,PS01187,PTHR24420,PF00069,PS00108,SM00181	GO:0004672	GO:0006468	GO:0005524	GO:0005524	GO:0005509	GO:0006468	GO:0005524	GO:0004672	GO:0006468	GO:0004674	GO:0005515
extended	3	-	-		Yes	Yes	AK369539	HC	3	123.23	528175520	NB-ARC;Disease resistance protein	IPR002182,IPR000767	PF00931,PR00364,PTHR23155:SF197,PTHR23155	GO:0006915	GO:0005524	GO:0006952
extended	3	-	-		Yes	Yes	AK371813	HC	3	123.23	528175520	-	-	-	-
extended	3	-	-		Yes	Yes	MLOC_10758.2	HC	3	123.23	528175520	K+ potassium transporter	IPR003855	PF02705	GO:0071805	GO:0015079	GO:0016020
extended	3	-	-		Yes	Yes	MLOC_12997.2	HC	3	123.23	528175520			PTHR10044,PTHR10044:SF7
extended	3	-	-		Yes	Yes	MLOC_1387.3	HC	3	123.23	528175520	-	-	-	-
extended	3	-	-		Yes	Yes	MLOC_34357.3	HC	3	123.23	528175520	Protein of unknown function DUF3754	IPR022227	PF12576
extended	3	-	-		Yes	Yes	MLOC_34358.1	HC	3	123.23	528175520	Serine-threonine/tyrosine-protein kinase	IPR001245	PF07714	GO:0004672	GO:0006468
extended	3	-	-		Yes	Yes	MLOC_55542.1	HC	3	123.23	528175520	Peptidase S10, serine carboxypeptidase;Peptidase S10, serine carboxypeptidase, active site	IPR001563,IPR018202	PR00724,PS00560,PS00131,PF00450,PTHR11802	GO:0004185	GO:0006508	GO:0006508	GO:0004185
extended	3	-	-		Yes	Yes	MLOC_61533.1	HC	3	123.23	528175520	Exostosin-like	IPR004263	PF03016	GO:0016020
extended	3	-	-		Yes	Yes	MLOC_63543.1	HC	3	123.23	528175520	F-box domain, cyclin-like	IPR001810	PF00646	GO:0005515
extended	3	-	-		Yes	Yes	MLOC_64806.1	HC	3	123.23	528175520	Exostosin-like	IPR004263	PTHR11062:SF24,PF03016,PTHR11062	GO:0016020
extended	3	-	-		Yes	Yes	MLOC_65284.2	HC	3	123.23	528175520	Cellular retinaldehyde-binding/triple function, C-terminal	IPR001251	PF00650
extended	3	-	-		Yes	Yes	MLOC_7569.1	HC	3	123.23	528175520	Initiation factor eIF-4 gamma, MA3;MIF4G-like, type 3	IPR003891,IPR003890	PF02847,PF02854	GO:0005515	GO:0016070
extended	3	-	-		Yes	Yes	MLOC_76930.1	HC	3	123.23	528175520	Exostosin-like	IPR004263	PF03016	GO:0016020
extended	3	-	-		Yes	Yes	MLOC_77692.1	HC	3	123.23	528175520	Micro-fibrillar-associated 1, C-terminal	IPR009730	PF06991	GO:0005576
extended	3	-	-		Yes	Yes	MLOC_78265.1	HC	3	123.23	528175520	Kelch repeat type 1	IPR006652	PF01344	GO:0005515
extended	3	-	-		Yes	Yes	MLOC_78725.2	HC	3	123.23	528175520	Haem peroxidase, plant/fungal/bacterial	IPR002016	PF00141	GO:0004601	GO:0006979	GO:0020037	GO:0055114
extended	3	-	-		Yes	Yes	MLOC_9820.1	HC	3	123.23	528175520	Heat shock protein DnaJ, N-terminal	IPR001623	PTHR24078:SF3,PF00226,PTHR24078,PF11926,SM00271	GO:0031072
extended	3	-	-		Yes	Yes	MLOC_62018.1	HC	3	123.46	528175520	Aspartate/glutamate/uridylate kinase	IPR001048	PF00696	GO:0008652
extended	3	-	-		Yes	Yes	MLOC_9746.3	LC	3	124.36	528175520	-	-	-	-
extended	3	-	-		Yes	Yes	MLOC_55238.1	LC	3	125.28	528175520	-	-	-	-
extended	3	-	-		Yes	Yes	AK353825	HC	3	126.06	528677720	TPP-binding enzyme, conserved site;Thiamine pyrophosphate enzyme, central domain;Thiamine pyrophosphate enzyme, N-terminal TPP-binding domain;Thiamine pyrophosphate enzyme, C-terminal TPP-binding	IPR000399,IPR012000,IPR012001,IPR011766	PS00187,PTHR18968,PF00205,PF02776,PF02775,PTHR18968:SF6	GO:0016740	GO:0030976	GO:0000287	GO:0000287	GO:0030976	GO:0030976	GO:0030976	GO:0003824
extended	3	-	-		Yes	Yes	AK365028	HC	3	126.06	528677720	Aminotransferase-like, plant mobile domain;Protein of unknown function DUF724	IPR019557,IPR007930	PF10536,PF05266
extended	3	-	-		Yes	Yes	AK366224	HC	3	126.06	528677720	Tafazzin;Phospholipid/glycerol acyltransferase	IPR000872,IPR002123	PR00979,SM00563,PTHR12497,PF01553	GO:0008152	GO:0008415
extended	3	-	-		Yes	Yes	AK372798	HC	3	126.06	528677720	Transcriptional factor B3;Aux/IAA-ARF-dimerisation;Auxin response factor;AUX/IAA protein	IPR003340,IPR011525,IPR010525,IPR003311	PS50863,PS50962,PF06507,PF02309,PF02362	GO:0006355	GO:0003677	GO:0046983	GO:0005634	GO:0006355	GO:0009725	GO:0003677	GO:0006355	GO:0005634
extended	3	-	-		Yes	Yes	AK373956	HC	3	126.06	528677720	-	-	-	-
extended	3	-	-		Yes	Yes	MLOC_23631.1	HC	3	126.06	528677720	Protein of unknown function DUF567	IPR007612	PF04525
extended	3	-	-		Yes	Yes	MLOC_34525.1	HC	3	126.06	528677720	Alcohol dehydrogenase, C-terminal;Alcohol dehydrogenase GroES-like	IPR013149,IPR013154	PF00107,PF08240	GO:0008270	GO:0055114	GO:0016491	GO:0055114	GO:0016491
extended	3	-	-		Yes	Yes	MLOC_54110.1	HC	3	126.06	528677720	-	-	-	-
extended	3	-	-		Yes	Yes	MLOC_70761.3	HC	3	126.06	528677720	Phox/Bem1p;Cystathionine beta-synthase, core	IPR000270,IPR000644	PF00564,PF00571	GO:0005515
extended	3	-	-		Yes	Yes	MLOC_61948.1	HC	3	126.7	528677720	Multicopper oxidase, type 2;Multicopper oxidase, type 1;Multicopper oxidase, type 3	IPR011706,IPR001117,IPR011707	PF07731,PF00394,PF07732	GO:0016491	GO:0005507	GO:0055114	GO:0055114	GO:0016491	GO:0005507
extended	3	-	-		Yes	Yes	MLOC_36331.2	HC	3	126.7	529002600	-	-	-	-
extended	3	-	-		Yes	Yes	AK356816	HC	3	126.7	529091880	BTB/POZ	IPR013069	PF00651	GO:0005515
extended	3	-	-		Yes	Yes	AK361511	HC	3	126.7	529091880	-	-	-	-
extended	3	-	-		Yes	Yes	MLOC_56562.1	HC	3	126.7	529091880	Rapid ALkalinization Factor	IPR008801	PF05498
extended	3	-	-		Yes	Yes	MLOC_14786.2	LC	3	126.7	528677720	-	-	-	-
extended	3	-	-		Yes	Yes	MLOC_19639.1	LC	3	126.7	528677720	-	-	-	-
extended	3	-	-		Yes	Yes	MLOC_25292.1	LC	3	126.7	528677720	-	-	-	-
extended	3	-	-		Yes	Yes	MLOC_33473.1	LC	3	126.7	528677720	-	-	-	-
extended	3	-	-		Yes	Yes	MLOC_16088.1	LC	3	126.7	529002600	-	-	-	-
extended	3	-	-		Yes	Yes	MLOC_34951.1	LC	3	126.7	529091880	-	-	-	-
extended	3	-	-		Yes	Yes	MLOC_56561.1	LC	3	126.7	529091880	-	-	-	-
extended	3	-	-		Yes	Yes	MLOC_56544.1	HC	3	126.98	529091880	WD40 repeat, subgroup	IPR019781	PF00400
extended	3	-	-		Yes	Yes	MLOC_56543.1	LC	3	126.98	529091880	-	-	-	-
extended	3	-	-		Yes	Yes	MLOC_5030.1	LC	3	127.02	529091880	-	-	-	-
extended	3	-	-		Yes	Yes	MLOC_71143.1	LC	3	127.02	529091880	-	-	-	-
extended	3	-	-		Yes	Yes	MLOC_71144.1	LC	3	127.02	529091880	-	-	-	-
extended	3	-	-		Yes	Yes	MLOC_71145.1	LC	3	127.02	529091880	-	-	-	-
extended	3	-	-		Yes	Yes	MLOC_71146.1	LC	3	127.02	529091880	-	-	-	-
aMarker located in the extended ±4cM intervall (extended), position of best sequence alignment (alignment)

## Sheet: Qps.3H-3
Supporting Information 2 | Alignment of markers with DR >50% using BARLEYMAP
Markera	Chr	cM	Base pairs	barlex_pos_bp	Multiple positions	Other alignments	Gene	HC/LC	Chr	cM	Bp	Description	InterPro	Signatures	GO terms									total of relevant GO terms:
extended	3	-	-		Yes	Yes	AK370723	HC	3	129.32	533637720	Tudor-like, plant;Agenet	IPR014002,IPR008395	SM00743,PF05641	GO:0003723
extended	3	-	-		Yes	Yes	MLOC_58721.1	HC	3	130.13	533637720	F-box associated domain, type 3	IPR013187	PF08268																	GO:0000166	name: nucleotide binding	namespace: molecular_function
extended	3	-	-		Yes	Yes	MLOC_5073.1	LC	3	130.17	533637720	-	-	-	-																GO:0019001	name: guanyl nucleotide binding	namespace: molecular_function
extended	3	-	-		Yes	Yes	AK372967	HC	3	130.67	533637720	Tetratricopeptide repeat;Tetratricopeptide repeat-containing;Ankyrin repeat-containing domain;Ankyrin repeat	IPR019734,IPR013026,IPR020683,IPR002110	PR01415,PS50005,PS50293,PTHR22904:SF114,PS50297,PS50088,SM00248,PTHR22904,PF00023	GO:0005515																GO:0050660	name: flavin adenine dinucleotide binding	namespace: molecular_function
extended	3	-	-		Yes	Yes	AK365554	LC	3	130.84	533637720	-	-	-	-																GO:0004096	name: catalase activity	namespace: molecular_function
extended	3	-	-		Yes	Yes	MLOC_24989.1	LC	3	131.3	533637720	-	-	-	-																GO:0006952	name: defense response	namespace: biological_process
extended	3	-	-		Yes	Yes	MLOC_57948.1	LC	3	131.3	533637720	-	-	-	-																GO:0050832	name: defense response to fungus	namespace: biological_process
extended	3	-	-		Yes	Yes	MLOC_57949.1	LC	3	131.3	533637720	-	-	-	-																GO:0004568	name: chitinase activity	namespace: molecular_function
extended	3	-	-		Yes	Yes	MLOC_57950.1	LC	3	131.3	533637720	-	-	-	-																GO:0004601	name: peroxidase activity	namespace: molecular_function
extended	3	-	-		Yes	Yes	MLOC_57951.1	LC	3	131.3	533637720	-	-	-	-																GO:0005777	name: peroxisome	namespace: cellular_component
extended	3	-	-		Yes	Yes	MLOC_57952.1	LC	3	131.3	533637720	-	-	-	-																GO:0006950	name: response to stress	namespace: biological_process
extended	3	-	-		Yes	Yes	MLOC_57953.1	LC	3	131.3	533637720	-	-	-	-																GO:0006979	name: response to oxidative stress	namespace: biological_process
extended	3	-	-		Yes	Yes	MLOC_57954.1	LC	3	131.3	533637720	-	-	-	-																GO:0007186	name: G-protein coupled receptor signaling pathway	namespace: biological_process
extended	3	-	-		Yes	Yes	MLOC_63515.1	LC	3	131.3	533637720	-	-	-	-																GO:0007205	name: protein kinase C-activating G-protein coupled receptor signaling pathway	namespace: biological_process
extended	3	-	-		Yes	Yes	MLOC_63516.1	LC	3	131.3	533637720	-	-	-	-																GO:0008020	name: G-protein coupled photoreceptor activity	namespace: molecular_function
extended	3	-	-		Yes	Yes	MLOC_80038.1	LC	3	131.3	533637720	-	-	-	-																GO:0008262	name: nuclear export signal receptor activity	namespace: molecular_function
extended	3	-	-		Yes	Yes	MLOC_80645.1	LC	3	131.3	533637720	-	-	-	-																GO:0004970	name: ionotropic glutamate receptor activity	namespace: molecular_function
extended	3	-	-		Yes	Yes	AK364016	HC	3	131.3	533637720	-	-	-	-																GO:0016998	name: cell wall macromolecule catabolic process	namespace: biological_process
extended	3	-	-		Yes	Yes	AK370351	HC	3	131.3	533637720	Peptidase A1	IPR001461	PTHR13683:SF100,PTHR13683	GO:0006508	GO:0004190															GO:0005618	name: cell wall	namespace: cellular_component
extended	3	-	-		Yes	Yes	MLOC_44143.1	HC	3	131.3	533637720	-	-	-	-																GO:0042545	name: cell wall modification	namespace: biological_process
extended	3	-	-		Yes	Yes	MLOC_55123.1	HC	3	131.3	533637720	Oxoglutarate/iron-dependent oxygenase	IPR005123	PF03171	GO:0016706	GO:0016491	GO:0055114														GO:0042546	name: cell wall biogenesis	namespace: biological_process
extended	3	-	-		Yes	Yes	MLOC_63303.2	HC	3	131.48	533637720	Major sperm protein	IPR000535	PF00635	GO:0005198																GO:0008219	name: cell death	namespace: biological_process
extended	3	-	-		Yes	Yes	MLOC_67419.1	HC	3	131.59	533637720	Lipase, class 3	IPR002921	PF01764	GO:0006629	GO:0004806															GO:0005035	name: death receptor activity	namespace: molecular_function
extended	3	-	-		Yes	Yes	MLOC_67420.1	HC	3	131.59	533637720	Serine/threonine-protein kinase-like domain	IPR017442	PF00069	GO:0006468	GO:0005524	GO:0004672														GO:0005037	name: obsolete death receptor adaptor protein activity	namespace: molecular_function
extended	3	-	-		Yes	Yes	MLOC_56430.1	LC	3	131.62	533637720	-	-	-	-																GO:0005038	name: obsolete death receptor interacting protein activity	namespace: molecular_function
extended	3	-	-		Yes	Yes	AK355583	HC	3	131.66	534454880	Protein of unknown function DUF2043	IPR018610	PF09740																	GO:0005039	name: obsolete death receptor-associated factor activity	namespace: molecular_function
extended	3	-	-		Yes	Yes	MLOC_34510.1	HC	3	131.66	534454880	UDP-glucuronosyl/UDP-glucosyltransferase	IPR002213	PF00201	GO:0016758	GO:0008152															GO:0005040	name: decoy death receptor activity	namespace: molecular_function
extended	3	-	-		Yes	Yes	MLOC_49675.1	HC	3	131.66	534454880	Uncharacterised protein family UPF0497, trans-membrane plant	IPR006702	PF04535																	GO:0005123	name: death receptor binding	namespace: molecular_function
extended	3	-	-		Yes	Yes	MLOC_55208.5	HC	3	131.66	534454880	-	-	-	-																GO:0010343	name: singlet oxygen-mediated programmed cell death	namespace: biological_process
extended	3	-	-		Yes	Yes	MLOC_66242.1	HC	3	131.66	534454880	Late embryogenesis abundant protein, LEA-14	IPR004864	PF03168																	GO:0010421	name: hydrogen peroxide-mediated programmed cell death	namespace: biological_process
extended	3	-	-		Yes	Yes	MLOC_68609.1	HC	3	131.66	534454880	Hydroxyethylthiazole kinase	IPR000417	PF02110	GO:0004417	GO:0009228															GO:0010623	name: programmed cell death involved in cell development	namespace: biological_process
extended	3	-	-		Yes	Yes	MLOC_68610.1	HC	3	131.66	534454880	D-arabinono-1,4-lactone oxidase;FAD linked oxidase, N-terminal	IPR007173,IPR006094	PF04030,PF01565	GO:0003885	GO:0016020	GO:0055114	GO:0008762	GO:0055114	GO:0016491	GO:0050660										GO:0010940	name: positive regulation of necrotic cell death	namespace: biological_process
extended	3	-	-		Yes	Yes	MLOC_69544.3	HC	3	131.66	534454880	Zinc finger, C3HC4 RING-type	IPR018957	PF00097																	GO:0010941	name: regulation of cell death	namespace: biological_process
extended	3	-	-		Yes	Yes	AK355765	HC	3	131.66	534919880	Transcription factor TFIIIC, tau55-related	IPR019481	PF10419																	GO:0010942	name: positive regulation of cell death	namespace: biological_process
extended	3	-	-		Yes	Yes	AK376494	HC	3	131.66	534919880	-	-	-	-																GO:0012501	name: programmed cell death	namespace: biological_process
extended	3	-	-		Yes	Yes	MLOC_4648.1	LC	3	131.66	534919880	-	-	-	-																GO:0012502	name: induction of programmed cell death	namespace: biological_process
extended	3	-	-		Yes	Yes	MLOC_61762.1	HC	3	131.66	534919880	-	-	-	-																GO:0016265	name: obsolete death	namespace: biological_process
extended	3	-	-		Yes	Yes	MLOC_76100.1	HC	3	131.66	534919880	F-box domain, cyclin-like	IPR001810	PF00646	GO:0005515																GO:0012501	name: programmed cell death	namespace: biological_process
extended	3	-	-		Yes	Yes	MLOC_22686.1	HC	3	131.71	534919880	Uncharacterised protein family UPF0497, trans-membrane plant	IPR006702	PF04535																	GO:0006915	name: apoptotic process	namespace: biological_process
extended	3	-	-		Yes	Yes	MLOC_66028.1	HC	3	132.01	534919880	AMP-dependent synthetase/ligase	IPR000873	PF00501	GO:0003824	GO:0008152															GO:0005524	name: ATP binding	namespace: molecular_function
extended	3	-	-		Yes	Yes	MLOC_6558.1	LC	3	132.06	534919880	-	-	-	-																GO:0004672	name: protein kinase activity	namespace: molecular_function
extended	3	-	-		Yes	Yes	MLOC_6559.1	HC	3	132.06	534919880	SAM dependent carboxyl methyltransferase	IPR005299	PF03492	GO:0008168
extended	3	-	-		Yes	Yes	MLOC_61624.1	LC	3	132.12	534919880	-	-	-	-
extended	3	-	-		Yes	Yes	MLOC_37890.1	HC	3	132.12	534919880	-	-	-	-
extended	3	-	-		Yes	Yes	MLOC_64208.1	HC	3	132.24	535560960	NB-ARC	IPR002182	PF00931	GO:0006915	GO:0005524
extended	3	-	-		Yes	Yes	MLOC_64209.1	HC	3	132.24	535560960	Leucine-rich repeat	IPR001611	PF00560	GO:0005515
extended	3	-	-		Yes	Yes	MLOC_64418.1	HC	3	132.24	535560960	Leucine-rich repeat;NB-ARC	IPR001611,IPR002182	PF00560,PF00931	GO:0005515	GO:0006915	GO:0005524
extended	3	-	-		Yes	Yes	MLOC_66742.1	HC	3	132.24	535560960	-	-	-	-
extended	3	-	-		Yes	Yes	MLOC_66743.1	HC	3	132.24	535560960	-	-	-	-
extended	3	-	-		Yes	Yes	MLOC_7267.3	HC	3	132.24	535560960	Leucine-rich repeat;NB-ARC	IPR001611,IPR002182	PF00560,PF00931	GO:0005515	GO:0006915	GO:0005524
extended	3	-	-		Yes	Yes	MLOC_75674.1	LC	3	132.29	535560960	-	-	-	-
extended	3	-	-		Yes	Yes	MLOC_69339.2	HC	3	132.37	535560960	SAM dependent carboxyl methyltransferase	IPR005299	PF03492	GO:0008168
extended	3	-	-		Yes	Yes	MLOC_25639.1	LC	3	132.38	535560960	-	-	-	-
extended	3	-	-		Yes	Yes	AK356624	LC	3	132.47	535560960	-	-	-	-
extended	3	-	-		Yes	Yes	MLOC_6775.2	LC	3	132.47	535560960	-	-	-	-
extended	3	-	-		Yes	Yes	AK356340	HC	3	132.7	535560960	Transcription factor TAFII-31	IPR003162	PTHR12075,PF02291	GO:0006352
alignment	3	132.93	535560960	661286192	No	No	MLOC_12695.1	LC	3	132.93	535560960	-	-	-	-
alignment	3	132.93	535560960		No	No	MLOC_12696.1	LC	3	132.93	535560960	-	-	-	-
alignment	3	132.93	535560960		No	No	MLOC_12697.1	LC	3	132.93	535560960	-	-	-	-
alignment	3	132.93	535560960		No	No	MLOC_12698.1	LC	3	132.93	535560960	-	-	-	-
alignment	3	132.93	535560960		No	No	MLOC_12699.1	LC	3	132.93	535560960	-	-	-	-
alignment	3	132.93	535560960		No	No	MLOC_17033.1	LC	3	132.93	535560960	-	-	-	-
alignment	3	132.93	535560960		No	No	MLOC_17378.1	LC	3	132.93	535560960	-	-	-	-
alignment	3	132.93	535560960		No	No	MLOC_17379.1	LC	3	132.93	535560960	-	-	-	-
alignment	3	132.93	535560960		No	No	MLOC_17380.1	LC	3	132.93	535560960	-	-	-	-
alignment	3	132.93	535560960		No	No	MLOC_21857.1	LC	3	132.93	535560960	-	-	-	-
alignment	3	132.93	535560960		No	No	MLOC_22447.1	LC	3	132.93	535560960	-	-	-	-
alignment	3	132.93	535560960		No	No	MLOC_23252.1	LC	3	132.93	535560960	-	-	-	-
alignment	3	132.93	535560960		No	No	MLOC_23459.1	LC	3	132.93	535560960	-	-	-	-
alignment	3	132.93	535560960		No	No	MLOC_31555.1	LC	3	132.93	535560960	-	-	-	-
alignment	3	132.93	535560960		No	No	MLOC_37935.2	LC	3	132.93	535560960	-	-	-	-
alignment	3	132.93	535560960		No	No	MLOC_37936.1	LC	3	132.93	535560960	-	-	-	-
alignment	3	132.93	535560960		No	No	MLOC_37937.1	LC	3	132.93	535560960	-	-	-	-
alignment	3	132.93	535560960		No	No	MLOC_51802.1	LC	3	132.93	535560960	-	-	-	-
alignment	3	132.93	535560960		No	No	MLOC_51803.1	LC	3	132.93	535560960	-	-	-	-
alignment	3	132.93	535560960		No	No	MLOC_51804.1	LC	3	132.93	535560960	-	-	-	-
alignment	3	132.93	535560960		No	No	MLOC_51805.1	LC	3	132.93	535560960	-	-	-	-
alignment	3	132.93	535560960		No	No	MLOC_51806.1	LC	3	132.93	535560960	-	-	-	-
alignment	3	132.93	535560960		No	No	MLOC_51807.1	LC	3	132.93	535560960	-	-	-	-
alignment	3	132.93	535560960		No	No	MLOC_51808.2	LC	3	132.93	535560960	-	-	-	-
alignment	3	132.93	535560960		No	No	MLOC_51809.1	LC	3	132.93	535560960	-	-	-	-
alignment	3	132.93	535560960		No	No	MLOC_51810.1	LC	3	132.93	535560960	-	-	-	-
alignment	3	132.93	535560960		No	No	MLOC_56698.1	LC	3	132.93	535560960	-	-	-	-
alignment	3	132.93	535560960		No	No	MLOC_56699.1	LC	3	132.93	535560960	-	-	-	-
alignment	3	132.93	535560960		No	No	MLOC_58008.1	LC	3	132.93	535560960	-	-	-	-
alignment	3	132.93	535560960		No	No	MLOC_58009.1	LC	3	132.93	535560960	-	-	-	-
alignment	3	132.93	535560960		No	No	MLOC_58010.1	LC	3	132.93	535560960	-	-	-	-
alignment	3	132.93	535560960		No	No	MLOC_58011.1	LC	3	132.93	535560960	-	-	-	-
alignment	3	132.93	535560960		No	No	MLOC_58012.1	LC	3	132.93	535560960	-	-	-	-
alignment	3	132.93	535560960		No	No	MLOC_58013.1	LC	3	132.93	535560960	-	-	-	-
alignment	3	132.93	535560960		No	No	MLOC_58014.1	LC	3	132.93	535560960	-	-	-	-
alignment	3	132.93	535560960		No	No	MLOC_58015.2	LC	3	132.93	535560960	-	-	-	-
alignment	3	132.93	535560960		No	No	MLOC_58016.1	LC	3	132.93	535560960	-	-	-	-
alignment	3	132.93	535560960		No	No	MLOC_58190.1	LC	3	132.93	535560960	-	-	-	-
alignment	3	132.93	535560960		No	No	MLOC_58191.1	LC	3	132.93	535560960	-	-	-	-
alignment	3	132.93	535560960		No	No	MLOC_58192.1	LC	3	132.93	535560960	-	-	-	-
alignment	3	132.93	535560960		No	No	MLOC_58193.1	LC	3	132.93	535560960	-	-	-	-
alignment	3	132.93	535560960		No	No	MLOC_58194.1	LC	3	132.93	535560960	-	-	-	-
alignment	3	132.93	535560960		No	No	MLOC_58195.1	LC	3	132.93	535560960	-	-	-	-
alignment	3	132.93	535560960		No	No	MLOC_58196.1	LC	3	132.93	535560960	-	-	-	-
alignment	3	132.93	535560960		No	No	MLOC_58197.1	LC	3	132.93	535560960	-	-	-	-
alignment	3	132.93	535560960		No	No	MLOC_58198.1	LC	3	132.93	535560960	-	-	-	-
alignment	3	132.93	535560960		No	No	MLOC_6348.1	LC	3	132.93	535560960	-	-	-	-
alignment	3	132.93	535560960		No	No	MLOC_6349.1	LC	3	132.93	535560960	-	-	-	-
alignment	3	132.93	535560960		No	No	MLOC_6350.2	LC	3	132.93	535560960	-	-	-	-
alignment	3	132.93	535560960		No	No	MLOC_71696.1	LC	3	132.93	535560960	-	-	-	-
alignment	3	132.93	535560960		No	No	MLOC_71697.1	LC	3	132.93	535560960	-	-	-	-
alignment	3	132.93	535560960		No	No	MLOC_81449.1	LC	3	132.93	535560960	-	-	-	-
extended	3	-	-		Yes	Yes	MLOC_18877.1	HC	3	132.93	535560960	F-box domain, cyclin-like;F-box associated domain, type 3	IPR001810,IPR013187	PF00646,PF08268	GO:0005515
extended	3	-	-		Yes	Yes	MLOC_27807.1	HC	3	132.93	535560960	SAM dependent carboxyl methyltransferase	IPR005299	PF03492	GO:0008168
extended	3	-	-		Yes	Yes	MLOC_64744.1	HC	3	132.93	535560960	Protein of unknown function DUF295	IPR005174	PF03478
extended	3	-	-		Yes	Yes	MLOC_7530.1	HC	3	132.93	535560960	Ribonuclease P/MRP protein subunit	IPR002759	PF01900	GO:0008033	GO:0004540
extended	3	-	-		Yes	Yes	MLOC_25157.1	LC	3	133.07	535560960	-	-	-	-
extended	3	-	-		Yes	Yes	AK357035	LC	3	133.11	535560960	-	-	-	-
extended	3	-	-		Yes	Yes	MLOC_40207.1	LC	3	133.11	535560960	-	-	-	-
extended	3	-	-		Yes	Yes	MLOC_52716.1	LC	3	133.11	535560960	-	-	-	-
extended	3	-	-		Yes	Yes	MLOC_65588.1	LC	3	133.11	535560960	-	-	-	-
extended	3	-	-		Yes	Yes	MLOC_65589.1	LC	3	133.11	535560960	-	-	-	-
extended	3	-	-		Yes	Yes	MLOC_74497.1	LC	3	133.11	535560960	-	-	-	-
extended	3	-	-		Yes	Yes	MLOC_74498.1	LC	3	133.11	535560960	-	-	-	-
extended	3	-	-		Yes	Yes	MLOC_79376.1	LC	3	133.11	535560960	-	-	-	-
extended	3	-	-		Yes	Yes	MLOC_7964.2	LC	3	133.11	535560960	-	-	-	-
extended	3	-	-		Yes	Yes	MLOC_53215.1	HC	3	133.14	536406640	RNA recognition motif domain	IPR000504	PF00076	GO:0003676
extended	3	-	-		Yes	Yes	MLOC_6234.1	HC	3	133.14	536406640	Pentatricopeptide repeat	IPR002885	PF01535
extended	3	-	-		Yes	Yes	MLOC_62864.1	HC	3	133.14	536406640	General substrate transporter	IPR005828	PF00083	GO:0022857	GO:0055085	GO:0016021
extended	3	-	-		Yes	Yes	MLOC_63068.1	HC	3	133.14	536406640	Nascent polypeptide-associated complex NAC;Ubiquitin-associated/translation elongation factor EF1B, N-terminal	IPR002715,IPR000449	PTHR21713,PF01849,PS51151,PF00627	GO:0005515
extended	3	-	-		Yes	Yes	MLOC_9961.1	HC	3	133.14	536406640	General substrate transporter	IPR005828	PF00083	GO:0022857	GO:0055085	GO:0016021
extended	3	-	-		Yes	Yes	MLOC_9794.1	LC	3	133.22	536406640	-	-	-	-
extended	3	-	-		Yes	Yes	MLOC_9796.1	LC	3	133.22	536406640	-	-	-	-
extended	3	-	-		Yes	Yes	MLOC_9797.1	LC	3	133.22	536406640	-	-	-	-
extended	3	-	-		Yes	Yes	MLOC_9795.3	HC	3	133.22	536406640	General substrate transporter	IPR005828	PF00083	GO:0022857	GO:0055085	GO:0016021
extended	3	-	-		Yes	Yes	MLOC_13230.1	LC	3	133.29	536406640	-	-	-	-
extended	3	-	-		Yes	Yes	MLOC_20856.1	LC	3	133.29	536406640	-	-	-	-
extended	3	-	-		Yes	Yes	MLOC_44586.1	LC	3	133.29	536406640	-	-	-	-
extended	3	-	-		Yes	Yes	MLOC_54370.1	LC	3	133.29	536406640	-	-	-	-
extended	3	-	-		Yes	Yes	MLOC_54371.1	LC	3	133.29	536406640	-	-	-	-
extended	3	-	-		Yes	Yes	MLOC_54372.1	LC	3	133.29	536406640	-	-	-	-
extended	3	-	-		Yes	Yes	MLOC_54373.1	LC	3	133.29	536406640	-	-	-	-
extended	3	-	-		Yes	Yes	MLOC_54374.1	LC	3	133.29	536406640	-	-	-	-
extended	3	-	-		Yes	Yes	MLOC_55224.1	LC	3	133.29	536406640	-	-	-	-
extended	3	-	-		Yes	Yes	MLOC_55225.1	LC	3	133.29	536406640	-	-	-	-
extended	3	-	-		Yes	Yes	MLOC_55226.1	LC	3	133.29	536406640	-	-	-	-
extended	3	-	-		Yes	Yes	MLOC_55227.1	LC	3	133.29	536406640	-	-	-	-
extended	3	-	-		Yes	Yes	MLOC_55228.1	LC	3	133.29	536406640	-	-	-	-
extended	3	-	-		Yes	Yes	MLOC_55229.1	LC	3	133.29	536406640	-	-	-	-
extended	3	-	-		Yes	Yes	MLOC_55230.1	LC	3	133.29	536406640	-	-	-	-
extended	3	-	-		Yes	Yes	MLOC_55231.1	LC	3	133.29	536406640	-	-	-	-
extended	3	-	-		Yes	Yes	MLOC_55232.1	LC	3	133.29	536406640	-	-	-	-
extended	3	-	-		Yes	Yes	MLOC_55233.1	LC	3	133.29	536406640	-	-	-	-
extended	3	-	-		Yes	Yes	MLOC_55234.1	LC	3	133.29	536406640	-	-	-	-
extended	3	-	-		Yes	Yes	MLOC_55235.1	LC	3	133.29	536406640	-	-	-	-
extended	3	-	-		Yes	Yes	MLOC_59118.1	LC	3	133.29	536406640	-	-	-	-
extended	3	-	-		Yes	Yes	MLOC_65352.1	LC	3	133.29	536406640	-	-	-	-
extended	3	-	-		Yes	Yes	MLOC_65353.1	LC	3	133.29	536406640	-	-	-	-
extended	3	-	-		Yes	Yes	MLOC_65354.1	LC	3	133.29	536406640	-	-	-	-
extended	3	-	-		Yes	Yes	MLOC_65355.1	LC	3	133.29	536406640	-	-	-	-
extended	3	-	-		Yes	Yes	MLOC_65357.1	LC	3	133.29	536406640	-	-	-	-
extended	3	-	-		Yes	Yes	MLOC_67185.1	LC	3	133.29	536406640	-	-	-	-
extended	3	-	-		Yes	Yes	MLOC_67186.1	LC	3	133.29	536406640	-	-	-	-
extended	3	-	-		Yes	Yes	MLOC_70739.1	LC	3	133.29	536406640	-	-	-	-
extended	3	-	-		Yes	Yes	MLOC_70740.1	LC	3	133.29	536406640	-	-	-	-
extended	3	-	-		Yes	Yes	MLOC_80783.1	LC	3	133.29	536406640	-	-	-	-
extended	3	-	-		Yes	Yes	MLOC_38122.1	HC	3	133.29	536406640	Auxin efflux carrier	IPR004776	PF03547	GO:0055085	GO:0016021
extended	3	-	-		Yes	Yes	MLOC_44585.1	HC	3	133.29	536406640	-	-	-	-
extended	3	-	-		Yes	Yes	MLOC_65356.4	HC	3	133.29	536406640	N2,N2-dimethylguanosine tRNA methyltransferase	IPR002905	PF02005	GO:0008033	GO:0003723	GO:0004809
extended	3	-	-		Yes	Yes	MLOC_7046.1	HC	3	133.29	536406640	ATPase, P-type cation-transporter, N-terminal;ATPase, P-type, K/Mg/Cd/Cu/Zn/Na/Ca/Na/H-transporter;ATPase, P-type cation-transporter, C-terminal;Haloacid dehalogenase-like hydrolase;ATPase, P-type phosphorylation site;ATPase, P-type cation exchange, alpha subunit;ATPase, P-type, ATPase-associated domain	IPR004014,IPR001757,IPR006068,IPR005834,IPR018303,IPR006069,IPR008250	PTHR24093:SF73,PF00690,PTHR24093,PR00119,PF00689,PF00702,PS00154,SM00831,PR00121,PF12515,PF00122	GO:0015662	GO:0006812	GO:0006754	GO:0016020	GO:0005524	GO:0015662	GO:0016020	GO:0006754	GO:0016020	GO:0006754	GO:0006812	GO:0015662	GO:0003824	GO:0008152	GO:0015662	GO:0005524	GO:0006754	GO:0016020	GO:0006754	GO:0015662	GO:0000166	GO:0046872
extended	3	-	-		Yes	Yes	AK248936.1	HC	3	133.36	537540000	eRF1 domain 3;eRF1 domain 1/Pelota-like;eRF1 domain 2	IPR005142,IPR005140,IPR005141	PF03465,PF03463,PF03464
extended	3	-	-		Yes	Yes	AK250007.1	HC	3	133.36	537540000	Protein Transporter, Pam16	IPR005341	PF03656
extended	3	-	-		Yes	Yes	MLOC_58054.4	HC	3	133.36	537540000	-	-	-	-
extended	3	-	-		Yes	Yes	MLOC_67141.1	HC	3	133.36	537540000	eRF1 domain 3;eRF1 domain 1/Pelota-like;eRF1 domain 2	IPR005142,IPR005140,IPR005141	PF03465,PF03463,PF03464
extended	3	-	-		Yes	Yes	MLOC_67194.1	HC	3	133.36	537540000	Aph-1	IPR009294	PF06105	GO:0016021	GO:0043085	GO:0016485
extended	3	-	-		Yes	Yes	MLOC_70149.2	HC	3	133.36	537540000	Oxoglutarate/iron-dependent oxygenase	IPR005123	PF03171	GO:0016706	GO:0016491	GO:0055114
extended	3	-	-		Yes	Yes	MLOC_626.1	LC	3	133.76	537540000	-	-	-	-
extended	3	-	-		Yes	Yes	MLOC_63692.1	LC	3	133.76	537540000	-	-	-	-
extended	3	-	-		Yes	Yes	AK368082	HC	3	133.78	537540000	ThiJ/PfpI	IPR002818	PTHR11019,PTHR11019:SF28,PF01965
extended	3	-	-		Yes	Yes	MLOC_51226.1	LC	3	134.26	537540000	-	-	-	-
extended	3	-	-		Yes	Yes	MLOC_51227.1	HC	3	134.26	537540000	GHMP kinase	IPR006204	PF00288	GO:0016301	GO:0016310	GO:0005524
extended	3	-	-		Yes	Yes	MLOC_2020.1	LC	3	134.38	537540000	-	-	-	-
extended	3	-	-		Yes	Yes	MLOC_2021.1	LC	3	134.38	537540000	-	-	-	-
extended	3	-	-		Yes	Yes	MLOC_3025.1	LC	3	134.47	537540000	-	-	-	-
extended	3	-	-		Yes	Yes	MLOC_71096.1	HC	3	134.93	537540000	Barwin-related endoglucanase;Pollen allergen/expansin, C-terminal	IPR009009,IPR007117	PF03330,PF01357
extended	3	-	-		Yes	Yes	MLOC_46867.1	LC	3	134.93	537540000	-	-	-	-
extended	3	-	-		Yes	Yes	MLOC_44839.4	LC	3	135.38	537540000	-	-	-	-
extended	3	-	-		Yes	Yes	MLOC_16655.1	LC	3	135.48	537540000	-	-	-	-
extended	3	-	-		Yes	Yes	MLOC_18681.1	LC	3	135.48	537540000	-	-	-	-
extended	3	-	-		Yes	Yes	MLOC_63160.1	LC	3	135.48	537540000	-	-	-	-
extended	3	-	-		Yes	Yes	MLOC_66999.1	LC	3	135.48	537540000	-	-	-	-
extended	3	-	-		Yes	Yes	MLOC_67000.1	LC	3	135.48	537540000	-	-	-	-
extended	3	-	-		Yes	Yes	MLOC_67001.1	LC	3	135.48	537540000	-	-	-	-
extended	3	-	-		Yes	Yes	MLOC_67002.1	LC	3	135.48	537540000	-	-	-	-
extended	3	-	-		Yes	Yes	MLOC_9002.1	LC	3	135.48	537540000	-	-	-	-
extended	3	-	-		Yes	Yes	MLOC_9955.1	LC	3	135.48	537540000	-	-	-	-
extended	3	-	-		Yes	Yes	MLOC_16777.1	LC	3	135.48	538135200	-	-	-	-
extended	3	-	-		Yes	Yes	MLOC_16778.1	LC	3	135.48	538135200	-	-	-	-
extended	3	-	-		Yes	Yes	MLOC_2894.1	LC	3	135.48	538135200	-	-	-	-
extended	3	-	-		Yes	Yes	MLOC_36800.1	LC	3	135.48	538135200	-	-	-	-
extended	3	-	-		Yes	Yes	MLOC_45069.1	LC	3	135.48	538135200	-	-	-	-
extended	3	-	-		Yes	Yes	MLOC_66140.1	LC	3	135.48	538135200	-	-	-	-
extended	3	-	-		Yes	Yes	MLOC_68872.1	LC	3	135.48	538135200	-	-	-	-
extended	3	-	-		Yes	Yes	MLOC_72153.1	LC	3	135.48	538135200	-	-	-	-
extended	3	-	-		Yes	Yes	MLOC_72154.1	LC	3	135.48	538135200	-	-	-	-
extended	3	-	-		Yes	Yes	MLOC_72155.1	LC	3	135.48	538135200	-	-	-	-
extended	3	-	-		Yes	Yes	MLOC_72156.1	LC	3	135.48	538135200	-	-	-	-
extended	3	-	-		Yes	Yes	MLOC_7283.1	LC	3	135.48	538135200	-	-	-	-
extended	3	-	-		Yes	Yes	MLOC_9109.1	LC	3	135.48	538135200	-	-	-	-
extended	3	-	-		Yes	Yes	MLOC_9110.1	LC	3	135.48	538135200	-	-	-	-
extended	3	-	-		Yes	Yes	MLOC_40739.1	LC	3	135.48	538256720	-	-	-	-
extended	3	-	-		Yes	Yes	MLOC_46.3	LC	3	135.48	538256720	-	-	-	-
extended	3	-	-		Yes	Yes	MLOC_18468.1	HC	3	135.48	537540000	Pollen allergen/expansin, C-terminal;Barwin-related endoglucanase	IPR007117,IPR009009	PF01357,PF03330
extended	3	-	-		Yes	Yes	MLOC_60419.2	HC	3	135.48	537540000	DNA recombination and repair protein RecA	IPR013765	PF00154	GO:0005524	GO:0006281	GO:0003697
extended	3	-	-		Yes	Yes	MLOC_66627.2	HC	3	135.48	537540000	Glycerol-3-phosphate dehydrogenase, NAD-dependent, N-terminal;Glycerol-3-phosphate dehydrogenase, NAD-dependent, C-terminal	IPR011128,IPR006109	PF01210,PF07479	GO:0005737	GO:0016616	GO:0055114	GO:0046168	GO:0051287	GO:0016614	GO:0055114	GO:0005975
extended	3	-	-		Yes	Yes	MLOC_67003.1	HC	3	135.48	537540000	-	-	-	-
extended	3	-	-		Yes	Yes	AK360562	HC	3	135.48	538135200	Leucine-rich repeat-containing N-terminal, type 2;Leucine-rich repeat	IPR013210,IPR001611	PTHR24420,PF08263,PF00560,PTHR24420:SF610	GO:0005515
extended	3	-	-		Yes	Yes	AK362756	HC	3	135.48	538135200	Glycoside hydrolase, family 17	IPR000490	PTHR16631,PF00332,PS00587	GO:0004553	GO:0005975
extended	3	-	-		Yes	Yes	AK366042	HC	3	135.48	538135200	IQ motif, EF-hand binding site	IPR000048	PS50096,SM00015	GO:0005515
extended	3	-	-		Yes	Yes	MLOC_16325.1	HC	3	135.48	538135200	Inhibitor of apoptosis-promoting Bax1-related	IPR006214	PF01027
extended	3	-	-		Yes	Yes	MLOC_3510.1	HC	3	135.48	538135200	Endonuclease/exonuclease/phosphatase	IPR005135	PF03372
extended	3	-	-		Yes	Yes	MLOC_35344.1	HC	3	135.48	538135200	Cytochrome P450	IPR001128	PF00067	GO:0016705	GO:0055114	GO:0005506	GO:0009055	GO:0020037
extended	3	-	-		Yes	Yes	MLOC_58264.2	HC	3	135.48	538135200	Inhibitor of apoptosis-promoting Bax1-related	IPR006214	PF01027
extended	3	-	-		Yes	Yes	MLOC_70288.1	HC	3	135.48	538135200	K+ potassium transporter	IPR003855	PF02705	GO:0071805	GO:0015079	GO:0016020
extended	3	-	-		Yes	Yes	MLOC_72157.3	HC	3	135.48	538135200	Leucine-rich repeat;Leucine-rich repeat-containing N-terminal, type 2	IPR001611,IPR013210	PF00560,PF08263	GO:0005515
extended	3	-	-		Yes	Yes	MLOC_77921.1	HC	3	135.48	538135200	-	-	-	-
extended	3	-	-		Yes	Yes	MLOC_80849.1	HC	3	135.48	538135200	Glycoside hydrolase, family 17	IPR000490	PTHR16631,PF00332,PS00587	GO:0004553	GO:0005975
extended	3	-	-		Yes	Yes	AK368900	HC	3	135.62	538256720	Inhibitor of apoptosis-promoting Bax1-related	IPR006214	PTHR23291,PF01027,PTHR23291:SF9
extended	3	-	-		Yes	Yes	MLOC_31797.1	LC	3	136.01	538256720	-	-	-	-
extended	3	-	-		Yes	Yes	MLOC_59399.1	LC	3	136.54	538256720	-	-	-	-
aMarker located in the extended ±4cM intervall (extended), position of best sequence alignment (alignment)

## Sheet: Qps.3H-4
Supporting Information 2 | Alignment of markers with DR >50% using BARLEYMAP
Markera	Chr	cM	Base pairs	barlex_pos_bp	Multiple positions	Other alignments	Gene	HC/LC	Chr	cM	Bp	Description	InterPro	Signatures	GO terms									total of relevant GO terms:
extended	3	-	-		Yes	Yes	MLOC_60636.1	LC	3	138.62	542208600	-	-	-	-
extended	3	-	-		Yes	Yes	AK376591	HC	3	138.62	542208600	EF-HAND 2;EF-Hand 1, calcium-binding site;Calcium-binding EF-hand;EF-hand	IPR018249,IPR018247,IPR002048,IPR018248	PS50222,PTHR10891:SF39,PS00018,SM00054,PTHR10891,PF00036	GO:0005509								GO:0000166	name: nucleotide binding	namespace: molecular_function
extended	3	-	-		Yes	Yes	MLOC_60634.1	HC	3	138.62	542208600	-	-	-	-								GO:0019001	name: guanyl nucleotide binding	namespace: molecular_function
extended	3	-	-		Yes	Yes	AK370446	HC	3	138.74	542208600	Glutathione S-transferase/chloride channel, C-terminal;Glutathione S-transferase, C-terminal;Glutathione S-transferase, N-terminal	IPR017933,IPR004046,IPR004045	PTHR11260,PS50405,PF00043,PS50404,PF02798,PTHR11260:SF16	GO:0005515								GO:0050660	name: flavin adenine dinucleotide binding	namespace: molecular_function
extended	3	-	-		Yes	Yes	MLOC_57380.1	HC	3	138.74	542208600	Protein of unknown function DUF538	IPR007493	PF04398									GO:0004096	name: catalase activity	namespace: molecular_function
extended	3	-	-		Yes	Yes	MLOC_69179.4	HC	3	138.74	542208600	-	-	-	-								GO:0006952	name: defense response	namespace: biological_process
extended	3	-	-		Yes	Yes	AK373921	HC	3	138.74	542586800	Drug/metabolite transporter	IPR000620	PF00892	GO:0016020								GO:0050832	name: defense response to fungus	namespace: biological_process
extended	3	-	-		Yes	Yes	MLOC_51093.1	HC	3	138.74	542586800	Domain of unknown function DUF221	IPR003864	PTHR13018:SF5,PTHR13018,PF02714	GO:0016020								GO:0004568	name: chitinase activity	namespace: molecular_function
extended	3	-	-		Yes	Yes	MLOC_55655.1	HC	3	138.74	542586800	-	-	-	-								GO:0004601	name: peroxidase activity	namespace: molecular_function
extended	3	-	-		Yes	Yes	MLOC_47573.1	LC	3	138.74	542208600	-	-	-	-								GO:0005777	name: peroxisome	namespace: cellular_component
extended	3	-	-		Yes	Yes	MLOC_61667.1	LC	3	138.74	542208600	-	-	-	-								GO:0006950	name: response to stress	namespace: biological_process
extended	3	-	-		Yes	Yes	MLOC_74455.1	LC	3	138.74	542208600	-	-	-	-								GO:0006979	name: response to oxidative stress	namespace: biological_process
extended	3	-	-		Yes	Yes	MLOC_9925.2	LC	3	138.74	542208600	-	-	-	-								GO:0007186	name: G-protein coupled receptor signaling pathway	namespace: biological_process
extended	3	-	-		Yes	Yes	MLOC_9926.2	LC	3	138.74	542208600	-	-	-	-								GO:0007205	name: protein kinase C-activating G-protein coupled receptor signaling pathway	namespace: biological_process
extended	3	-	-		Yes	Yes	MLOC_55654.2	LC	3	138.74	542586800	-	-	-	-								GO:0008020	name: G-protein coupled photoreceptor activity	namespace: molecular_function
extended	3	-	-		Yes	Yes	MLOC_6137.1	LC	3	138.74	542586800	-	-	-	-								GO:0008262	name: nuclear export signal receptor activity	namespace: molecular_function
extended	3	-	-		Yes	Yes	MLOC_75721.1	LC	3	138.74	542586800	-	-	-	-								GO:0004970	name: ionotropic glutamate receptor activity	namespace: molecular_function
extended	3	-	-		Yes	Yes	MLOC_12325.1	HC	3	138.95	542586800	Plant disease resistance response protein	IPR004265	PF03018									GO:0016998	name: cell wall macromolecule catabolic process	namespace: biological_process
extended	3	-	-		Yes	Yes	AK248931.1	HC	3	139.06	542586800	Carotenoid oxygenase	IPR004294	PF03055									GO:0005618	name: cell wall	namespace: cellular_component
extended	3	-	-		Yes	Yes	MLOC_19331.1	HC	3	139.06	542586800	Glutathione S-transferase, N-terminal;Glutathione S-transferase, C-terminal	IPR004045,IPR004046	PF02798,PF00043	GO:0005515								GO:0042545	name: cell wall modification	namespace: biological_process
extended	3	-	-		Yes	Yes	MLOC_12547.2	HC	3	139.16	543092720	Protein of unknown function DUF241, plant	IPR004320	PF03087									GO:0042546	name: cell wall biogenesis	namespace: biological_process
extended	3	-	-		Yes	Yes	MLOC_3948.1	HC	3	139.16	543092720	Calmodulin-binding protein, plant	IPR012417	PF07839									GO:0008219	name: cell death	namespace: biological_process
extended	3	-	-		Yes	Yes	MLOC_7071.1	HC	3	139.16	543092720	Glutathione S-transferase, N-terminal	IPR004045	PF02798	GO:0005515								GO:0005035	name: death receptor activity	namespace: molecular_function
extended	3	-	-		Yes	Yes	MLOC_8156.1	HC	3	139.16	543092720	Protein of unknown function DUF241, plant	IPR004320	PF03087									GO:0005037	name: obsolete death receptor adaptor protein activity	namespace: molecular_function
extended	3	-	-		Yes	Yes	MLOC_8157.1	HC	3	139.16	543092720	Protein of unknown function DUF241, plant	IPR004320	PF03087									GO:0005038	name: obsolete death receptor interacting protein activity	namespace: molecular_function
extended	3	-	-		Yes	Yes	AK358196	HC	3	139.31	543092720	Protein of unknown function DUF3529	IPR021919	PF12046									GO:0005039	name: obsolete death receptor-associated factor activity	namespace: molecular_function
extended	3	-	-		Yes	Yes	MLOC_46420.1	LC	3	139.38	543092720	-	-	-	-								GO:0005040	name: decoy death receptor activity	namespace: molecular_function
extended	3	-	-		Yes	Yes	AK354126	HC	3	139.38	543092720	Pentatricopeptide repeat	IPR002885	PS51375,PTHR24015,PF01535									GO:0005123	name: death receptor binding	namespace: molecular_function
extended	3	-	-		Yes	Yes	MLOC_11461.1	LC	3	139.59	543092720	-	-	-	-								GO:0010343	name: singlet oxygen-mediated programmed cell death	namespace: biological_process
extended	3	-	-		Yes	Yes	MLOC_25171.1	LC	3	139.59	543092720	-	-	-	-								GO:0010421	name: hydrogen peroxide-mediated programmed cell death	namespace: biological_process
extended	3	-	-		Yes	Yes	MLOC_60161.1	LC	3	139.59	543092720	-	-	-	-								GO:0010623	name: programmed cell death involved in cell development	namespace: biological_process
extended	3	-	-		Yes	Yes	AK355129	HC	3	139.59	543092720	Glycoside hydrolase, family 2, immunoglobulin-like beta-sandwich;Glycoside hydrolase, family 2, active site;Glycoside hydrolase, family 2, domain 5;Glycoside hydrolase, family 2, conserved site;Glycoside hydrolase, family 2, TIM barrel;Glycoside hydrolase, family 2;Glycoside hydrolase, family 2, N-terminal	IPR006102,IPR023232,IPR004199,IPR023230,IPR006103,IPR006101,IPR006104	PF00703,PS00608,PF02929,PTHR10066,PS00719,PF02836,PR00132,PF02837,PTHR10066:SF41	GO:0005975	GO:0004553	GO:0005975	GO:0004565	GO:0009341	GO:0004553	GO:0005975		GO:0010940	name: positive regulation of necrotic cell death	namespace: biological_process
extended	3	-	-		Yes	Yes	AK369094	HC	3	139.59	543092720	Amidohydrolase 3	IPR013108	PTHR22642,PF07969									GO:0010941	name: regulation of cell death	namespace: biological_process
extended	3	-	-		Yes	Yes	MLOC_25172.1	HC	3	139.59	543092720	-	-	-	-								GO:0010942	name: positive regulation of cell death	namespace: biological_process
extended	3	-	-		Yes	Yes	MLOC_25173.1	HC	3	139.59	543092720	Protein of unknown function DUF241, plant	IPR004320	PF03087									GO:0012501	name: programmed cell death	namespace: biological_process
extended	3	-	-		Yes	Yes	MLOC_60159.1	HC	3	139.59	543092720	Protein of unknown function DUF241, plant	IPR004320	PF03087									GO:0012502	name: induction of programmed cell death	namespace: biological_process
extended	3	-	-		Yes	Yes	MLOC_60160.1	HC	3	139.59	543092720	Protein of unknown function DUF241, plant	IPR004320	PF03087									GO:0016265	name: obsolete death	namespace: biological_process
extended	3	-	-		Yes	Yes	AK355649	HC	3	139.59	544087200	-	-	-	-								GO:0012501	name: programmed cell death	namespace: biological_process
extended	3	-	-		Yes	Yes	AK356379	HC	3	139.59	544087200	Arf GTPase activating protein;C2 calcium-dependent membrane targeting	IPR001164,IPR000008	PF01412,PF00168	GO:0008060	GO:0032312	GO:0008270	GO:0005515					GO:0006915	name: apoptotic process	namespace: biological_process
extended	3	-	-		Yes	Yes	MLOC_10574.3	HC	3	139.59	544087200	Leucine-rich repeat;NB-ARC	IPR001611,IPR002182	PF00560,PF00931	GO:0005515	GO:0006915	GO:0005524						GO:0005524	name: ATP binding	namespace: molecular_function
extended	3	-	-		Yes	Yes	MLOC_14891.1	HC	3	139.59	544087200	Orotidine 5'-phosphate decarboxylase domain;Phosphoribosyltransferase;Orotidine 5'-phosphate decarboxylase, active site	IPR001754,IPR000836,IPR018089	PF00215,SM00934,PTHR19278:SF21,PF00156,PS00156,PTHR19278	GO:0006207	GO:0004590	GO:0009116	GO:0004590	GO:0006207				GO:0004672	name: protein kinase activity	namespace: molecular_function
extended	3	-	-		Yes	Yes	MLOC_16427.1	HC	3	139.59	544087200	-	-	-	-								GO:0005515	protein binding	molecular function
extended	3	-	-		Yes	Yes	MLOC_16428.1	HC	3	139.59	544087200	-	-	-	-
extended	3	-	-		Yes	Yes	MLOC_6337.1	HC	3	139.59	544087200	-	-	-	-
extended	3	-	-		Yes	Yes	MLOC_64769.1	HC	3	139.59	544087200	Serine/threonine-protein kinase-like domain	IPR017442	PF00069	GO:0006468	GO:0005524	GO:0004672
extended	3	-	-		Yes	Yes	MLOC_6793.2	HC	3	139.59	544087200	Orotidine 5'-phosphate decarboxylase domain;Phosphoribosyltransferase;Orotidine 5'-phosphate decarboxylase, active site	IPR001754,IPR000836,IPR018089	SM00934,PTHR19278,PF00156,PTHR19278:SF21,PS00156,PF00215	GO:0006207	GO:0004590	GO:0009116	GO:0004590	GO:0006207
extended	3	-	-		Yes	Yes	MLOC_75270.1	HC	3	139.59	544087200	Lycopene cyclase-type, FAD-binding	IPR008671	PF05834	GO:0016705	GO:0016117
extended	3	-	-		Yes	Yes	MLOC_17193.2	HC	3	139.59	544891960	SNF2-related;Helicase, C-terminal;Zinc finger, CW-type	IPR000330,IPR001650,IPR011124	PF00176,PF00271,PF07496	GO:0005524	GO:0003677	GO:0004386	GO:0005524	GO:0003676	GO:0008270
extended	3	-	-		Yes	Yes	MLOC_34455.1	HC	3	139.59	544891960	Cupin 1	IPR006045	PF00190	GO:0045735
extended	3	-	-		Yes	Yes	MLOC_4805.1	HC	3	139.59	544891960	Regulator of chromosome condensation, RCC1;Brevis radix-like domain;Zinc finger, FYVE-type	IPR000408,IPR013591,IPR000306	PF00415,PF08381,PF01363	GO:0046872
extended	3	-	-		Yes	Yes	MLOC_52477.1	HC	3	139.59	544891960	RAG1-activating protein-1-related	IPR004316	PF03083	GO:0016021
extended	3	-	-		Yes	Yes	MLOC_58315.2	HC	3	139.59	544891960	Peptidase A22B, signal peptide peptidase	IPR007369	PF04258	GO:0016021	GO:0004190
extended	3	-	-		Yes	Yes	MLOC_75892.1	HC	3	139.59	544891960	Protein of unknown function DUF241, plant	IPR004320	PF03087
extended	3	-	-		Yes	Yes	MLOC_75893.1	HC	3	139.59	544891960	Protein of unknown function DUF241, plant	IPR004320	PF03087
extended	3	-	-		Yes	Yes	MLOC_75894.1	HC	3	139.59	544891960	Protein of unknown function DUF241, plant	IPR004320	PF03087
extended	3	-	-		Yes	Yes	MLOC_78412.1	HC	3	139.59	544891960	Glucoamylase, putatuve	IPR004314	PF03080
extended	3	-	-		Yes	Yes	MLOC_79670.1	HC	3	139.59	544891960	Protein of unknown function DUF241, plant	IPR004320	PF03087
extended	3	-	-		Yes	Yes	MLOC_5484.1	HC	3	139.67	544891960	Villin headpiece;Gelsolin domain	IPR003128,IPR007123	PF02209,PF00626	GO:0007010	GO:0003779
extended	3	-	-		Yes	Yes	MLOC_53361.1	LC	3	140.44	544891960	-	-	-	-
extended	3	-	-		Yes	Yes	MLOC_51409.1	HC	3	140.86	544891960	RNA-dependent RNA polymerase, eukaryotic-type	IPR007855	PF05183	GO:0003968
extended	3	-	-		Yes	Yes	MLOC_24338.1	LC	3	140.88	544891960	-	-	-	-
extended	3	-	-		Yes	Yes	AK355523	HC	3	141.86	546453120	Ribosomal protein S11	IPR001971	PF00411,PTHR11759,PTHR11759:SF2	GO:0005840	GO:0005622	GO:0003735	GO:0006412
extended	3	-	-		Yes	Yes	AK359895	HC	3	141.86	546453120	-	-	-	-
extended	3	-	-		Yes	Yes	AK371210	HC	3	141.86	546453120	Helix-loop-helix DNA-binding domain;Achaete-scute transcription factor-related	IPR001092,IPR015660	SM00353,PF00010,PTHR13935:SF2,PS50888,PTHR13935	GO:0006355	GO:0003677
extended	3	-	-		Yes	Yes	MLOC_40055.2	HC	3	141.86	546453120	-	-	-	-
extended	3	-	-		Yes	Yes	MLOC_5175.2	HC	3	141.86	546453120	NADPH-dependent FMN reductase	IPR005025	PF03358
extended	3	-	-		Yes	Yes	MLOC_63853.4	HC	3	141.86	546453120	Serine-threonine/tyrosine-protein kinase;Gnk2-homologous domain	IPR001245,IPR002902	PF07714,PF01657	GO:0004672	GO:0006468
extended	3	-	-		Yes	Yes	MLOC_65217.1	HC	3	141.86	546453120	-	-	-	-
extended	3	-	-		Yes	Yes	MLOC_65345.1	HC	3	141.86	546453120	Helix-loop-helix DNA-binding domain	IPR001092	PF00010	GO:0006355
extended	3	-	-		Yes	Yes	MLOC_69583.1	HC	3	141.86	546453120	Phosphoesterase	IPR007312	PF04185	GO:0016788
extended	3	-	-		Yes	Yes	MLOC_70286.1	HC	3	141.86	546453120	-	-	-	-
extended	3	-	-		Yes	Yes	MLOC_81908.1	HC	3	141.86	546453120	Lateral organ boundaries, LOB	IPR004883	PS50891,PF03195
extended	3	-	-		Yes	Yes	MLOC_64101.1	LC	3	142.14	546453120	-	-	-	-
extended	3	-	-		Yes	Yes	MLOC_64102.1	LC	3	142.14	546453120	-	-	-	-
extended	3	-	-		Yes	Yes	AK360264	HC	3	142.14	546453120	Amidohydrolase 3	IPR013108	PF07969,PTHR22642
extended	3	-	-		Yes	Yes	MLOC_61789.1	HC	3	142.14	546453120	NADPH-dependent FMN reductase	IPR005025	PF03358
extended	3	-	-		Yes	Yes	MLOC_64100.2	HC	3	142.14	546453120	Signal transduction response regulator, receiver domain	IPR001789	PF00072	GO:0006355	GO:0000156	GO:0000160
extended	3	-	-		Yes	Yes	MLOC_7195.2	HC	3	142.14	546453120	Protein of unknown function DUF295	IPR005174	PF03478
extended	3	-	-		Yes	Yes	MLOC_36351.1	HC	3	142.47	546453120	Helix-loop-helix DNA-binding domain	IPR001092	PF00010	GO:0006355
alignment	3	142.58	546453120	676490418	No	No	MLOC_10867.1	LC	3	142.58	546453120	-	-	-	-
alignment	3	142.58	546453120		No	No	MLOC_32006.1	LC	3	142.58	546453120	-	-	-	-
extended	3	-	-		Yes	Yes	MLOC_65962.1	HC	3	142.58	546453120	-	-	-	-
extended	3	-	-		Yes	Yes	MLOC_57075.1	HC	3	142.63	546453120	Protein of unknown function DUF247, plant	IPR004158	PF03140
extended	3	-	-		Yes	Yes	MLOC_57074.1	LC	3	142.63	546453120	-	-	-	-
extended	3	-	-		Yes	Yes	AK251259.1	HC	3	142.92	546453120	Haloacid dehalogenase-like hydrolase	IPR005834	PF00702	GO:0003824	GO:0008152
extended	3	-	-		Yes	Yes	AK372959	LC	3	143.02	546453120	-	-	-	-
extended	3	-	-		Yes	Yes	MLOC_47153.1	LC	3	143.02	546453120	-	-	-	-
extended	3	-	-		Yes	Yes	MLOC_55650.1	LC	3	143.02	546453120	-	-	-	-
extended	3	-	-		Yes	Yes	MLOC_69584.1	LC	3	143.02	546453120	-	-	-	-
extended	3	-	-		Yes	Yes	MLOC_7865.1	LC	3	143.02	546453120	-	-	-	-
extended	3	-	-		Yes	Yes	MLOC_10167.2	HC	3	143.02	546453120	Serine/threonine-protein kinase-like domain	IPR017442	PF00069	GO:0006468	GO:0005524	GO:0004672
extended	3	-	-		Yes	Yes	MLOC_45620.1	LC	3	143.08	546453120	-	-	-	-
extended	3	-	-		Yes	Yes	MLOC_78781.1	LC	3	143.08	546453120	-	-	-	-
extended	3	-	-		Yes	Yes	MLOC_8959.1	LC	3	143.08	546453120	-	-	-	-
extended	3	-	-		Yes	Yes	MLOC_8960.1	LC	3	143.08	546453120	-	-	-	-
extended	3	-	-		Yes	Yes	MLOC_10787.1	HC	3	143.08	546453120	EF-hand	IPR018248	PF00036
extended	3	-	-		Yes	Yes	MLOC_15356.1	HC	3	143.08	546453120	NADPH-dependent FMN reductase	IPR005025	PF03358
extended	3	-	-		Yes	Yes	MLOC_53950.2	HC	3	143.08	546453120	Glycosyl transferase, family 2	IPR001173	PF00535
extended	3	-	-		Yes	Yes	AK252941.1	HC	3	143.13	546453120	Serine/threonine-protein kinase-like domain	IPR017442	PF00069	GO:0006468	GO:0005524	GO:0004672
extended	3	-	-		Yes	Yes	AK353875	HC	3	143.13	548920720	-	-	-	-
extended	3	-	-		Yes	Yes	AK354249	HC	3	143.13	548920720	Protein kinase, catalytic domain;Leucine-rich repeat-containing N-terminal, type 2;Leucine-rich repeat;Serine/threonine-protein kinase-like domain	IPR000719,IPR013210,IPR001611,IPR017442	PS50011,PF08263,PS51450,PR00019,PF00560,PTHR24420,PF00069,PTHR24420:SF795	GO:0004672	GO:0006468	GO:0005524	GO:0005515	GO:0006468	GO:0005524	GO:0004672
extended	3	-	-		Yes	Yes	AK358057	HC	3	143.13	548920720	Signal recognition particle, SRP54 subunit, GTPase;Signal recognition particle, SRP54 subunit, helical bundle;ATPase, AAA+ type, core	IPR000897,IPR013822,IPR003593	PS00300,PF02881,PF00448,PTHR11564:SF10,PTHR11564,SM00382,SM00962,SM00963	GO:0005525	GO:0006614	GO:0000166	GO:0017111
extended	3	-	-		Yes	Yes	AK360520	HC	3	143.13	548920720	Protein of unknown function DUF1005	IPR010410	PF06219
extended	3	-	-		Yes	Yes	AK367623	HC	3	143.13	548920720	Inorganic polyphosphate/ATP-NAD kinase, predicted	IPR002504	PF01513	GO:0003951	GO:0008152
extended	3	-	-		Yes	Yes	MLOC_10832.5	HC	3	143.13	548920720	THO complex, subunitTHOC2, C-terminal	IPR021418	PF11262
extended	3	-	-		Yes	Yes	MLOC_11423.1	HC	3	143.13	548920720	NB-ARC	IPR002182	PF00931	GO:0006915	GO:0005524
extended	3	-	-		Yes	Yes	MLOC_11441.2	HC	3	143.13	548920720	Serine-threonine/tyrosine-protein kinase	IPR001245	PF07714	GO:0004672	GO:0006468
extended	3	-	-		Yes	Yes	MLOC_24939.1	HC	3	143.13	548920720	Protein of unknown function DUF247, plant	IPR004158	PF03140
extended	3	-	-		Yes	Yes	MLOC_26846.1	HC	3	143.13	548920720	Protein of unknown function DUF597	IPR006734	PF04640
extended	3	-	-		Yes	Yes	MLOC_34364.2	HC	3	143.13	548920720	-	-	-	-
extended	3	-	-		Yes	Yes	MLOC_45419.1	HC	3	143.13	548920720	Cytochrome P450	IPR001128	PF00067	GO:0016705	GO:0055114	GO:0005506	GO:0009055	GO:0020037
extended	3	-	-		Yes	Yes	MLOC_54134.2	HC	3	143.13	548920720	Plant methyltransferase dimerisation;O-methyltransferase, family 2	IPR012967,IPR001077	PF08100,PF00891	GO:0008168	GO:0046983	GO:0008171
extended	3	-	-		Yes	Yes	MLOC_56446.6	HC	3	143.13	548920720	Serine-threonine/tyrosine-protein kinase	IPR001245	PF07714	GO:0004672	GO:0006468
extended	3	-	-		Yes	Yes	MLOC_57482.2	HC	3	143.13	548920720	Uncharacterised domain NUC173	IPR012978	PF08161
extended	3	-	-		Yes	Yes	MLOC_68405.1	HC	3	143.13	548920720	-	-	-	-
extended	3	-	-		Yes	Yes	MLOC_80092.1	LC	3	143.13	546453120	-	-	-	-
extended	3	-	-		Yes	Yes	MLOC_80093.1	LC	3	143.13	546453120	-	-	-	-
extended	3	-	-		Yes	Yes	MLOC_28756.1	LC	3	143.13	548920720	-	-	-	-
extended	3	-	-		Yes	Yes	MLOC_28757.1	LC	3	143.13	548920720	-	-	-	-
extended	3	-	-		Yes	Yes	MLOC_53889.1	LC	3	143.13	548920720	-	-	-	-
extended	3	-	-		Yes	Yes	MLOC_55359.1	LC	3	143.13	548920720	-	-	-	-
extended	3	-	-		Yes	Yes	MLOC_55360.1	LC	3	143.13	548920720	-	-	-	-
extended	3	-	-		Yes	Yes	MLOC_9434.1	LC	3	143.13	548920720	-	-	-	-
extended	3	-	-		Yes	Yes	MLOC_65592.1	HC	3	143.38	548920720	Glycoside hydrolase, family 17;X8	IPR000490,IPR012946	PF00332,PF07983	GO:0004553	GO:0005975
extended	3	-	-		Yes	Yes	MLOC_17298.2	HC	3	143.48	549396880	Lipase, class 3	IPR002921	PF01764	GO:0006629	GO:0004806
extended	3	-	-		Yes	Yes	MLOC_4848.1	HC	3	143.48	549396880	RNA recognition motif domain	IPR000504	PF00076	GO:0003676
extended	3	-	-		Yes	Yes	MLOC_57257.1	HC	3	143.48	549396880	Multi antimicrobial extrusion protein	IPR002528	PF01554	GO:0015238	GO:0006855	GO:0016020	GO:0055085	GO:0015297
extended	3	-	-		Yes	Yes	MLOC_73948.1	HC	3	143.48	549396880	RNA-binding, CRM domain	IPR001890	PF01985	GO:0003723
extended	3	-	-		Yes	Yes	MLOC_80878.1	HC	3	143.48	549396880	Lipase, class 3	IPR002921	PF01764	GO:0006629	GO:0004806
extended	3	-	-		Yes	Yes	AK371229	HC	3	143.63	549396880	Protein of unknown function DUF2305	IPR019363	PF10230,PTHR13390
extended	3	-	-		Yes	Yes	MLOC_77192.1	HC	3	144.12	549396880	PWWP	IPR000313	PF00855
extended	3	-	-		Yes	Yes	AK357570	HC	3	144.12	549633720	-	-	-	-
extended	3	-	-		Yes	Yes	AK374559	HC	3	144.12	549633720	Gamma-secretase aspartyl protease complex, presenilin enhancer-2 subunit	IPR019379	PTHR16318,PF10251
extended	3	-	-		Yes	Yes	MLOC_71996.1	LC	3	144.25	549633720	-	-	-	-
extended	3	-	-		Yes	Yes	MLOC_71995.5	HC	3	144.25	549633720	Pentatricopeptide repeat	IPR002885	PF01535
extended	3	-	-		Yes	Yes	MLOC_6185.1	LC	3	144.37	549633720	-	-	-	-
extended	3	-	-		Yes	Yes	AK373343	HC	3	144.37	549633720	Glucoamylase, putatuve	IPR004314	PF03080
extended	3	-	-		Yes	Yes	MLOC_58449.1	HC	3	144.37	549633720	Bulb-type lectin domain	IPR001480	PF01453,PTHR11795:SF49,PTHR11795,SM00108,PS50927	GO:0005529
extended	3	-	-		Yes	Yes	MLOC_45075.1	LC	3	144.62	549633720	-	-	-	-
extended	3	-	-		Yes	Yes	MLOC_49550.1	LC	3	144.62	549935040	-	-	-	-
extended	3	-	-		Yes	Yes	AK360420	HC	3	144.62	549633720	Glucose-inhibited division protein A-related	IPR002218	PTHR11806,PR00411,PF01134	GO:0050660	GO:0008033
extended	3	-	-		Yes	Yes	AK363554	HC	3	144.62	549633720	-	-	-	-
extended	3	-	-		Yes	Yes	MLOC_12571.3	HC	3	144.62	549935040	Glycoside hydrolase, family 17	IPR000490	PF00332	GO:0004553	GO:0005975
extended	3	-	-		Yes	Yes	MLOC_65947.5	HC	3	144.62	549935040	Ubiquitin;SWAP/Surp;Pre-mRNA splicing factor PRP21-like protein;Ubiquitin supergroup	IPR000626,IPR000061,IPR022030,IPR019955	PF00240,PF01805,PF12230,PS50053,PTHR15316,SM00648,PS50128,SM00213	GO:0005515	GO:0006396	GO:0003723
extended	3	-	-		Yes	Yes	MLOC_66148.1	HC	3	144.62	549935040	Zinc finger, RING-type;Copine;von Willebrand factor, type A	IPR001841,IPR010734,IPR002035	PS50089,PF07002,SM00184,PTHR10857,SM00327	GO:0008270	GO:0005515	GO:0005515
extended	3	-	-		Yes	Yes	MLOC_80105.4	HC	3	144.62	549935040	Domain of unknown function DUF632	IPR006867	PF04782
extended	3	-	-		Yes	Yes	MLOC_15424.1	LC	3	144.9	549935040	-	-	-	-
extended	3	-	-		Yes	Yes	MLOC_15425.1	LC	3	144.9	549935040	-	-	-	-
extended	3	-	-		Yes	Yes	AK369969	HC	3	145.33	550465760	Protein of unknown function DUF295	IPR005174	PF03478
extended	3	-	-		Yes	Yes	MLOC_4620.2	HC	3	145.33	550465760	Malectin;Serine-threonine/tyrosine-protein kinase	IPR021720,IPR001245	PF11721,PF07714	GO:0004672	GO:0006468
extended	3	-	-		Yes	Yes	MLOC_69113.1	LC	3	145.33	550465760	-	-	-	-
extended	3	-	-		Yes	Yes	AK354044	HC	3	145.43	550465760	-	-	-	-
extended	3	-	-		Yes	Yes	MLOC_54550.1	LC	3	145.54	550465760	-	-	-	-
extended	3	-	-		Yes	Yes	MLOC_68526.1	LC	3	145.54	550465760	-	-	-	-
extended	3	-	-		Yes	Yes	MLOC_68527.1	LC	3	145.54	550465760	-	-	-	-
extended	3	-	-		Yes	Yes	MLOC_68528.1	LC	3	145.54	550465760	-	-	-	-
extended	3	-	-		Yes	Yes	MLOC_68529.1	LC	3	145.54	550465760	-	-	-	-
extended	3	-	-		Yes	Yes	MLOC_7617.1	LC	3	145.54	550465760	-	-	-	-
extended	3	-	-		Yes	Yes	AK367352	HC	3	145.54	550465760	Protein Transporter, Pam16	IPR005341	PF03656,PTHR12388
extended	3	-	-		Yes	Yes	AK374664	HC	3	145.54	550465760	-	-	-	-
extended	3	-	-		Yes	Yes	MLOC_12726.1	HC	3	145.54	550465760	F-box domain, cyclin-like	IPR001810	PF00646	GO:0005515
extended	3	-	-		Yes	Yes	MLOC_64719.1	HC	3	145.54	550465760	NAD-dependent epimerase/dehydratase	IPR001509	PF01370	GO:0044237	GO:0003824	GO:0050662
extended	3	-	-		Yes	Yes	MLOC_71720.2	LC	3	145.57	550465760	-	-	-	-
extended	3	-	-		Yes	Yes	MLOC_60178.1	LC	3	145.82	550465760	-	-	-	-
extended	3	-	-		Yes	Yes	MLOC_10284.1	LC	3	145.82	551731800	-	-	-	-
extended	3	-	-		Yes	Yes	AK354147	HC	3	145.82	551731800	Ceramidase	IPR008901	PF05875	GO:0006672	GO:0016021	GO:0016811
extended	3	-	-		Yes	Yes	MLOC_10955.1	HC	3	145.82	551731800	ABA/WDS induced protein	IPR003496	PF02496	GO:0006950
extended	3	-	-		Yes	Yes	MLOC_14435.1	HC	3	145.82	551731800	ABA/WDS induced protein	IPR003496	PF02496	GO:0006950
extended	3	-	-		Yes	Yes	MLOC_19323.1	HC	3	145.82	551731800	Clathrin/coatomer adaptor, adaptin-like, N-terminal	IPR002553	PF01602	GO:0016192	GO:0030117	GO:0006886
extended	3	-	-		Yes	Yes	MLOC_51903.1	HC	3	145.82	551731800	-	-	-	-
extended	3	-	-		Yes	Yes	MLOC_59030.1	HC	3	145.82	551731800	-	-	-	-
extended	3	-	-		Yes	Yes	MLOC_58087.1	LC	3	145.89	551920280	-	-	-	-
extended	3	-	-		Yes	Yes	MLOC_10046.2	HC	3	145.96	551920280	NAD-dependent epimerase/dehydratase	IPR001509	PF01370	GO:0044237	GO:0003824	GO:0050662
extended	3	-	-		Yes	Yes	MLOC_51385.1	LC	3	146.03	551920280	-	-	-	-
extended	3	-	-		Yes	Yes	AK248819.1	HC	3	146.1	551920280	Like-Sm ribonucleoprotein (LSM) domain	IPR001163	PF01423
extended	3	-	-		Yes	Yes	MLOC_66671.1	LC	3	146.1	551920280	-	-	-	-
extended	3	-	-		Yes	Yes	AK361718	HC	3	146.1	552075280	Syntaxin 6, N-terminal;Target SNARE coiled-coil domain	IPR015260,IPR000727	PF09177,PF05739,PTHR12380,PS50192	GO:0016020	GO:0048193	GO:0005515
extended	3	-	-		Yes	Yes	AK367944	HC	3	146.1	552075280	DNA mismatch repair, conserved site;DNA mismatch repair protein;ATPase-like, ATP-binding domain;DNA mismatch repair protein Mlh1;DNA mismatch repair protein, C-terminal	IPR014762,IPR002099,IPR003594,IPR011186,IPR013507	PS00058,PTHR10073,PF02518,PTHR10073:SF11,PF01119,SM00387	GO:0005524	GO:0006298	GO:0030983	GO:0005524	GO:0006298	GO:0005634
extended	3	-	-		Yes	Yes	AK375567	HC	3	146.1	552075280	Zinc finger, HIT-type	IPR007529	PF04438,PTHR13483:SF3,PTHR13483,PS51083
extended	3	-	-		Yes	Yes	MLOC_46940.1	LC	3	146.1	552075280	-	-	-	-
extended	3	-	-		Yes	Yes	MLOC_50331.1	LC	3	146.1	552075280	-	-	-	-
extended	3	-	-		Yes	Yes	MLOC_50332.1	LC	3	146.1	552075280	-	-	-	-
extended	3	-	-		Yes	Yes	MLOC_61286.1	LC	3	146.1	552075280	-	-	-	-
extended	3	-	-		Yes	Yes	MLOC_61287.1	LC	3	146.1	552075280	-	-	-	-
extended	3	-	-		Yes	Yes	MLOC_61288.1	LC	3	146.1	552075280	-	-	-	-
extended	3	-	-		Yes	Yes	MLOC_61289.1	LC	3	146.1	552075280	-	-	-	-
extended	3	-	-		Yes	Yes	MLOC_74792.1	HC	3	146.1	552075280	Ubiquitin-like, Ufm1	IPR005375	PTHR15825,PF03671
extended	3	-	-		Yes	Yes	AK363535	LC	3	146.1	552415040	-	-	-	-
extended	3	-	-		Yes	Yes	MLOC_10316.1	HC	3	146.1	552415040	-	-	-	-
extended	3	-	-		Yes	Yes	MLOC_13232.1	LC	3	146.1	552415040	-	-	-	-
extended	3	-	-		Yes	Yes	MLOC_13233.1	LC	3	146.1	552415040	-	-	-	-
extended	3	-	-		Yes	Yes	MLOC_13234.2	HC	3	146.1	552415040	Leucine-rich repeat;NB-ARC	IPR001611,IPR002182	PF00560,PF00931	GO:0005515	GO:0006915	GO:0005524
extended	3	-	-		Yes	Yes	MLOC_15200.1	LC	3	146.1	552415040	-	-	-	-
extended	3	-	-		Yes	Yes	MLOC_15201.1	LC	3	146.1	552415040	-	-	-	-
extended	3	-	-		Yes	Yes	MLOC_54160.1	HC	3	146.1	552415040	F-box domain, cyclin-like	IPR001810	PF00646	GO:0005515
extended	3	-	-		Yes	Yes	MLOC_72680.1	LC	3	146.1	552415040	-	-	-	-
extended	3	-	-		Yes	Yes	MLOC_69114.2	HC	3	146.35	552415040	Pheophorbide a oxygenase;Rieske [2Fe-2S] iron-sulphur domain	IPR013626,IPR017941	PF08417,PF00355	GO:0055114	GO:0010277	GO:0016491	GO:0051537	GO:0055114
extended	3	-	-		Yes	Yes	MLOC_21627.1	LC	3	146.53	552415040	-	-	-	-
extended	3	-	-		Yes	Yes	MLOC_47553.1	LC	3	146.53	552415040	-	-	-	-
extended	3	-	-		Yes	Yes	MLOC_80057.1	HC	3	146.53	552415040	NB-ARC	IPR002182	PF00931	GO:0006915	GO:0005524
aMarker located in the extended ±4cM intervall (extended), position of best sequence alignment (alignment)

## Sheet: QPs.5H-1
Supporting Information 2 | Alignment of markers with DR >50% using BARLEYMAP
Markera	Chr	cM	Base pairs	barlex_pos_bp	Multiple positions	Other alignments	Gene	HC/LC	Chr	cM	Bp	Description	InterPro	Signatures	GO terms									total of relevant GO terms:
extended	5	-	-		Yes	Yes	MLOC_20904.1	HC	5	127.93	501382840	Peptidyl-prolyl cis-trans isomerase, FKBP-type, domain;Tetratricopeptide repeat;Tetratricopeptide repeat-containing;Peptidyl-prolyl cis-trans isomerase, FKBP-type	IPR001179,IPR019734,IPR013026,IPR023566	PS50059,PTHR10516:SF71,PF00254,PS50005,PS50293,PTHR10516,SM00028	GO:0006457	GO:0005515
extended	5	-	-		Yes	Yes	MLOC_64136.1	HC	5	127.96	501382840	Proteinase inhibitor I9, subtilisin propeptide;Protease-associated domain, PA;Peptidase S8/S53, subtilisin/kexin/sedolisin	IPR010259,IPR003137,IPR000209	PF05922,PF02225,PF00082	GO:0042802	GO:0043086	GO:0004252	GO:0006508	GO:0004252										GO:0000166	name: nucleotide binding	namespace: molecular_function
extended	5	-	-		Yes	Yes	MLOC_6081.1	HC	5	128.06	501382840	Protein of unknown function DUF869, plant	IPR008587	PF05911															GO:0019001	name: guanyl nucleotide binding	namespace: molecular_function
extended	5	-	-		Yes	Yes	MLOC_71367.2	LC	5	128.06	501382840	-	-	-	-														GO:0050660	name: flavin adenine dinucleotide binding	namespace: molecular_function
extended	5	-	-		Yes	Yes	AK251195.1	HC	5	128.12	501594880	Ankyrin repeat	IPR002110	PF00023	GO:0005515														GO:0004096	name: catalase activity	namespace: molecular_function
extended	5	-	-		Yes	Yes	MLOC_39472.1	LC	5	128.19	501944560	-	-	-	-														GO:0006952	name: defense response	namespace: biological_process
extended	5	-	-		Yes	Yes	MLOC_61819.1	LC	5	128.19	502240920	-	-	-	-														GO:0050832	name: defense response to fungus	namespace: biological_process
extended	5	-	-		Yes	Yes	MLOC_32288.1	LC	5	128.19	502704680	-	-	-	-														GO:0004568	name: chitinase activity	namespace: molecular_function
extended	5	-	-		Yes	Yes	AK367135	HC	5	128.19	501944560	-	-	-	-														GO:0004601	name: peroxidase activity	namespace: molecular_function
extended	5	-	-		Yes	Yes	MLOC_4793.1	HC	5	128.19	501944560	Pentatricopeptide repeat	IPR002885	PF01535,PS51375,PTHR24015															GO:0005777	name: peroxisome	namespace: cellular_component
extended	5	-	-		Yes	Yes	MLOC_75007.5	HC	5	128.19	501944560	Heat shock protein DnaJ, N-terminal	IPR001623	PF00226	GO:0031072														GO:0006950	name: response to stress	namespace: biological_process
extended	5	-	-		Yes	Yes	AK376220	HC	5	128.19	502240920	Aspartate/homoserine dehydrogenase, NAD-binding;Aspartate/glutamate/uridylate kinase;Aspartate kinase, conserved site;Amino acid-binding ACT;Homoserine dehydrogenase, catalytic;Homoserine dehydrogenase, conserved site	IPR005106,IPR001048,IPR018042,IPR002912,IPR001342,IPR019811	PTHR21499:SF3,PF03447,PF00696,PTHR21499,PS00324,PF01842,PF00742,PS01042	GO:0055114	GO:0016491	GO:0050661	GO:0008652	GO:0008652	GO:0004072	GO:0008152	GO:0016597	GO:0055114	GO:0006520	GO:0006520	GO:0055114			GO:0006979	name: response to oxidative stress	namespace: biological_process
extended	5	-	-		Yes	Yes	MLOC_1021.1	HC	5	128.19	502240920	Protein of unknown function DUF593	IPR007656	PF04576															GO:0007186	name: G-protein coupled receptor signaling pathway	namespace: biological_process
extended	5	-	-		Yes	Yes	AK367064	HC	5	128.19	502704680	Oxoglutarate/iron-dependent oxygenase	IPR005123	PF03171	GO:0016706	GO:0016491	GO:0055114												GO:0007205	name: protein kinase C-activating G-protein coupled receptor signaling pathway	namespace: biological_process
extended	5	-	-		Yes	Yes	MLOC_55943.1	HC	5	128.19	502704680	Serine/threonine-protein kinase-like domain	IPR017442	PF00069	GO:0006468	GO:0005524	GO:0004672												GO:0008020	name: G-protein coupled photoreceptor activity	namespace: molecular_function
extended	5	-	-		Yes	Yes	MLOC_57775.2	HC	5	128.19	502704680	Haem peroxidase, plant/fungal/bacterial	IPR002016	PF00141	GO:0004601	GO:0006979	GO:0020037	GO:0055114											GO:0008262	name: nuclear export signal receptor activity	namespace: molecular_function
extended	5	-	-		Yes	Yes	AK374671	HC	5	128.19	502829920	Protein of unknown function DUF566	IPR007573	PF04484															GO:0004970	name: ionotropic glutamate receptor activity	namespace: molecular_function
extended	5	-	-		Yes	Yes	MLOC_75334.1	LC	5	129.44	502976240	-	-	-	-														GO:0016998	name: cell wall macromolecule catabolic process	namespace: biological_process
extended	5	-	-		Yes	Yes	MLOC_8275.1	LC	5	129.44	503347000	-	-	-	-														GO:0005618	name: cell wall	namespace: cellular_component
extended	5	-	-		Yes	Yes	MLOC_8276.1	LC	5	129.44	503347000	-	-	-	-														GO:0042545	name: cell wall modification	namespace: biological_process
extended	5	-	-		Yes	Yes	MLOC_21971.1	LC	5	129.44	505210720	-	-	-	-														GO:0042546	name: cell wall biogenesis	namespace: biological_process
extended	5	-	-		Yes	Yes	MLOC_21972.1	LC	5	129.44	505210720	-	-	-	-														GO:0008219	name: cell death	namespace: biological_process
extended	5	-	-		Yes	Yes	MLOC_21973.1	LC	5	129.44	505210720	-	-	-	-														GO:0005035	name: death receptor activity	namespace: molecular_function
extended	5	-	-		Yes	Yes	MLOC_56549.1	LC	5	129.44	505210720	-	-	-	-														GO:0005037	name: obsolete death receptor adaptor protein activity	namespace: molecular_function
extended	5	-	-		Yes	Yes	AK357704	HC	5	129.44	502976240	-	-	-	-														GO:0005038	name: obsolete death receptor interacting protein activity	namespace: molecular_function
extended	5	-	-		Yes	Yes	AK249847.1	HC	5	129.44	503347000	SWIB/MDM2 domain;DEK, C-terminal	IPR003121,IPR014876	PF02201,PF08766	GO:0005515														GO:0005039	name: obsolete death receptor-associated factor activity	namespace: molecular_function
extended	5	-	-		Yes	Yes	AK367148	HC	5	129.44	503347000			PTHR14237															GO:0005040	name: decoy death receptor activity	namespace: molecular_function
extended	5	-	-		Yes	Yes	AK374298	HC	5	129.44	503347000	Serine/threonine-protein kinase-like domain	IPR017442	PF00069	GO:0006468	GO:0005524	GO:0004672												GO:0005123	name: death receptor binding	namespace: molecular_function
extended	5	-	-		Yes	Yes	AK248418.1	HC	5	129.44	504780440	Serine/threonine-protein kinase-like domain	IPR017442	PF00069	GO:0006468	GO:0005524	GO:0004672												GO:0010343	name: singlet oxygen-mediated programmed cell death	namespace: biological_process
extended	5	-	-		Yes	Yes	AK358227	HC	5	129.44	504780440	Cold acclimation WCOR413	IPR008892	PF05562															GO:0010421	name: hydrogen peroxide-mediated programmed cell death	namespace: biological_process
extended	5	-	-		Yes	Yes	AK362002	HC	5	129.44	504780440	NPH3	IPR004249	PF03000	GO:0009416	GO:0004871													GO:0010623	name: programmed cell death involved in cell development	namespace: biological_process
extended	5	-	-		Yes	Yes	AK363763	HC	5	129.44	504780440	Peptidase S26A, signal peptidase I;Peptidase S26A, signal peptidase I, serine active site;Peptidase S24/S26A/S26B;Peptidase S26A, signal peptidase I, conserved site;Peptidase S26A, signal peptidase I, lysine active site	IPR000223,IPR019756,IPR019759,IPR019758,IPR019757	PR00727,PTHR12383:SF1,PS00501,PTHR12383,PF00717,PS00761,PS00760	GO:0006508	GO:0016020	GO:0008236	GO:0016021	GO:0008236	GO:0008236	GO:0016021								GO:0010940	name: positive regulation of necrotic cell death	namespace: biological_process
extended	5	-	-		Yes	Yes	AK366287	HC	5	129.44	504780440	Cytochrome P450, E-class, group IV;Cytochrome P450	IPR002403,IPR001128	PR00465,PF00067	GO:0020037	GO:0004497	GO:0016705	GO:0055114	GO:0005506	GO:0016705	GO:0055114	GO:0005506	GO:0009055	GO:0020037					GO:0010941	name: regulation of cell death	namespace: biological_process
extended	5	-	-		Yes	Yes	AK370260	HC	5	129.44	504780440	Uncharacterised protein family UPF0497, trans-membrane plant	IPR006702	PF04535															GO:0010942	name: positive regulation of cell death	namespace: biological_process
extended	5	-	-		Yes	Yes	AK374118	HC	5	129.44	504780440	Myb, DNA-binding	IPR014778	PF00249															GO:0012501	name: programmed cell death	namespace: biological_process
extended	5	-	-		Yes	Yes	MLOC_16233.2	HC	5	129.44	504780440	Proteasome assembly chaperone 2	IPR019151	PF09754															GO:0012502	name: induction of programmed cell death	namespace: biological_process
extended	5	-	-		Yes	Yes	MLOC_63880.1	HC	5	129.44	504780440	-	-	-	-														GO:0016265	name: obsolete death	namespace: biological_process
extended	5	-	-		Yes	Yes	MLOC_67435.1	HC	5	129.44	504780440	-	-	-	-														GO:0012501	name: programmed cell death	namespace: biological_process
extended	5	-	-		Yes	Yes	AK354633	HC	5	129.44	505210720	Protein of unknown function DUF2053, membrane	IPR019164	PF09767,PTHR12869															GO:0006915	name: apoptotic process	namespace: biological_process
extended	5	-	-		Yes	Yes	MLOC_55782.1	HC	5	129.44	505210720	Bromodomain	IPR001487	PF00439	GO:0005515														GO:0005524	name: ATP binding	namespace: molecular_function
extended	5	-	-		Yes	Yes	MLOC_56550.1	HC	5	129.44	505210720	-	-	-	-														GO:0004672	name: protein kinase activity	namespace: molecular_function
extended	5	-	-		Yes	Yes	MLOC_67579.3	HC	5	129.44	505210720	-	-	-	-														GO:0005515	protein binding	molecular function
extended	5	-	-		Yes	Yes	MLOC_79114.1	HC	5	129.5	505210720	-	-	-	-
extended	5	-	-		Yes	Yes	AK251160.1	LC	5	129.5	505210720	-	-	-	-
extended	5	-	-		Yes	Yes	MLOC_18374.1	LC	5	129.5	505210720	-	-	-	-
extended	5	-	-		Yes	Yes	MLOC_38843.1	HC	5	129.6	505380600	bZIP transcription factor, bZIP-1	IPR011616	PF00170	GO:0006355	GO:0043565	GO:0003700	GO:0046983
extended	5	-	-		Yes	Yes	AK360946	HC	5	129.65	505380600	AP complex, mu/sigma subunit	IPR022775	PTHR11043,PF01217
extended	5	-	-		Yes	Yes	MLOC_22183.1	HC	5	129.65	505380600	Protein translocase complex, SecE/Sec61-gamma subunit	IPR001901	PF00584	GO:0006605	GO:0016020	GO:0006886
extended	5	-	-		Yes	Yes	MLOC_22184.1	HC	5	129.65	505380600	Microtubule-associated protein, MAP65/ASE1-type	IPR007145	PF03999,PTHR19321
extended	5	-	-		Yes	Yes	MLOC_44070.6	HC	5	129.65	505380600	Protein of unknown function DUF616	IPR006852	PF04765
extended	5	-	-		Yes	Yes	MLOC_61309.1	HC	5	129.65	505380600	-	-	-	-
extended	5	-	-		Yes	Yes	MLOC_67384.1	HC	5	129.65	505380600	BTB/POZ-like	IPR000210	SM00225,PS50097	GO:0005515
extended	5	-	-		Yes	Yes	MLOC_30020.2	LC	5	129.65	505380600	-	-	-	-
extended	5	-	-		Yes	Yes	AK356388	HC	5	129.69	505380600	Glycosyl transferase, family 2	IPR001173	PF00535
extended	5	-	-		Yes	Yes	MLOC_16128.1	LC	5	129.69	505380600	-	-	-	-
extended	5	-	-		Yes	Yes	MLOC_4106.1	LC	5	129.69	505380600	-	-	-	-
extended	5	-	-		Yes	Yes	MLOC_55437.2	LC	5	129.72	505380600	-	-	-	-
extended	5	-	-		Yes	Yes	MLOC_55438.1	LC	5	129.72	505380600	-	-	-	-
extended	5	-	-		Yes	Yes	MLOC_5987.1	LC	5	129.72	505380600	-	-	-	-
extended	5	-	-		Yes	Yes	MLOC_5988.1	LC	5	129.72	505380600	-	-	-	-
extended	5	-	-		Yes	Yes	AK248308.1	HC	5	129.72	505380600	Domain of unknown function DUF547	IPR006869	PF04784
extended	5	-	-		Yes	Yes	MLOC_10712.1	LC	5	129.79	505380600	-	-	-	-
extended	5	-	-		Yes	Yes	MLOC_63425.1	HC	5	129.83	505380600	Pathogenesis-related transcriptional factor/ERF, DNA-binding	IPR001471	PF00847	GO:0006355	GO:0003700
extended	5	-	-		Yes	Yes	MLOC_63423.1	LC	5	129.83	505380600	-	-	-	-
extended	5	-	-		Yes	Yes	MLOC_63424.1	LC	5	129.83	505380600	-	-	-	-
extended	5	-	-		Yes	Yes	MLOC_10642.1	LC	5	130	505380600	-	-	-	-
extended	5	-	-		Yes	Yes	MLOC_58589.2	HC	5	130	505380600	Eukaryotic translation initiation factor 3 subunit 8, N-terminal;Proteasome component (PCI) domain	IPR008905,IPR000717	PF05470,PF01399	GO:0003743	GO:0005852	GO:0006413	GO:0005515
extended	5	-	-		Yes	Yes	MLOC_71335.2	HC	5	130	505380600	Cytochrome P450	IPR001128	PF00067	GO:0016705	GO:0055114	GO:0005506	GO:0009055	GO:0020037
extended	5	-	-		Yes	Yes	MLOC_44341.2	HC	5	130	505572800	Domain of unknown function DUF1336	IPR009769	PF07059
extended	5	-	-		Yes	Yes	AK375136	LC	5	130.35	505572800	-	-	-	-
extended	5	-	-		Yes	Yes	MLOC_60335.2	LC	5	130.35	505572800	-	-	-	-
extended	5	-	-		Yes	Yes	AK249476.1	HC	5	130.59	505572800	Kinesin, motor domain	IPR001752	PF00225	GO:0005524	GO:0003777	GO:0007018
extended	5	-	-		Yes	Yes	AK358376	HC	5	130.9	506583400	-	-	-	-
extended	5	-	-		Yes	Yes	AK363250	HC	5	130.9	506583400	Serine/threonine-protein kinase-like domain;Leucine-rich repeat;Protein kinase, catalytic domain	IPR017442,IPR001611,IPR000719	PF00069,PS51450,PTHR24420,PF00560,PTHR24420:SF797,PS50011	GO:0006468	GO:0005524	GO:0004672	GO:0005515	GO:0004672	GO:0006468	GO:0005524
extended	5	-	-		Yes	Yes	MLOC_37278.1	HC	5	130.9	506583400	Cytochrome P450	IPR001128	PF00067	GO:0016705	GO:0055114	GO:0005506	GO:0009055	GO:0020037
extended	5	-	-		Yes	Yes	MLOC_39143.3	HC	5	130.9	506583400	HAD-superfamily hydrolase, subfamily IG, 5'-nucleotidase	IPR008380	PF05761
extended	5	-	-		Yes	Yes	MLOC_55124.1	HC	5	130.9	506583400	-	-	-	-
extended	5	-	-		Yes	Yes	MLOC_55125.1	HC	5	130.9	506583400	Protein of unknown function DUF1005	IPR010410	PF06219
extended	5	-	-		Yes	Yes	MLOC_61101.1	HC	5	130.9	506583400	Alpha/beta hydrolase fold-3	IPR013094	PTHR23024,PF07859,PTHR23024:SF10	GO:0016787	GO:0008152
extended	5	-	-		Yes	Yes	MLOC_64140.1	HC	5	130.9	506583400	Lactate/malate dehydrogenase, C-terminal;Malate dehydrogenase, type 1;Malate dehydrogenase, active site;Lactate/malate dehydrogenase, N-terminal	IPR022383,IPR010097,IPR001252,IPR001236	PF02866,PTHR11540,PTHR11540:SF1,PS00068,PF00056	GO:0055114	GO:0016616	GO:0006108	GO:0030060	GO:0055114	GO:0006108	GO:0016615	GO:0055114	GO:0055114	GO:0016491
extended	5	-	-		Yes	Yes	MLOC_21936.2	LC	5	130.9	505572800	-	-	-	-
extended	5	-	-		Yes	Yes	MLOC_21937.1	LC	5	130.9	505572800	-	-	-	-
extended	5	-	-		Yes	Yes	MLOC_52788.1	HC	5	131.18	506583400	Tubulin/FtsZ, GTPase domain;Tubulin/FtsZ, 2-layer sandwich domain;Alpha tubulin;Tubulin;Tubulin, conserved site	IPR003008,IPR018316,IPR002452,IPR000217,IPR017975	PF00091,PF03953,PR01162,PTHR11588,PR01161,SM00865,SM00864,PS00227	GO:0043234	GO:0051258	GO:0003924	GO:0043234	GO:0051258	GO:0006184	GO:0005525	GO:0005874	GO:0005198	GO:0005525	GO:0007018	GO:0005874
extended	5	-	-		Yes	Yes	MLOC_52896.3	HC	5	131.18	506583400	Transcription regulator HTH, Myb-type, DNA-binding;Myb transcription factor;Myb, DNA-binding;SANT domain, DNA binding	IPR017930,IPR015495,IPR014778,IPR001005	PS51294,PTHR10641,PF00249,SM00717	GO:0003677
extended	5	-	-		Yes	Yes	MLOC_65920.1	HC	5	131.18	506583400	4Fe-4S binding domain;4Fe-4S ferredoxin, iron-sulpur binding domain;4Fe-4S ferredoxin, iron-sulphur binding, conserved site	IPR001450,IPR017896,IPR017900	PF00037,PTHR10849,PS51379,PS00198	GO:0051536	GO:0009055	GO:0051536	GO:0009055	GO:0051536
extended	5	-	-		Yes	Yes	MLOC_77955.2	HC	5	131.18	506583400	Leucine zipper, homeobox-associated;Homeobox	IPR003106,IPR001356	PF02183,PF00046	GO:0005634	GO:0003677	GO:0006355	GO:0003700	GO:0043565	GO:0006355
extended	5	-	-		Yes	Yes	MLOC_52897.1	LC	5	131.18	506583400	-	-	-	-
extended	5	-	-		Yes	Yes	MLOC_72122.1	LC	5	131.18	506583400	-	-	-	-
extended	5	-	-		Yes	Yes	MLOC_58904.1	HC	5	131.56	506583400	Actin-binding, cofilin/tropomyosin type	IPR002108	PS51263,PF00241,SM00102,PTHR11913	GO:0003779	GO:0005622
extended	5	-	-		Yes	Yes	MLOC_41322.1	LC	5	131.6	506583400	-	-	-	-
extended	5	-	-		Yes	Yes	AK375493	HC	5	131.6	506583400	tRNA wybutosine-synthesis;Flavodoxin;Radical SAM;Flavodoxin/nitric oxide synthase	IPR013917,IPR001094,IPR007197,IPR008254	PF08608,PR00369,PF04055,PTHR13930,PS50902,PF00258	GO:0005506	GO:0055114	GO:0010181	GO:0051536	GO:0003824	GO:0016491	GO:0010181
extended	5	-	-		Yes	Yes	MLOC_52361.3	HC	5	131.6	506583400	Pentatricopeptide repeat	IPR002885	PF01535
extended	5	-	-		Yes	Yes	AK353993	HC	5	131.67	506583400	-	-	-	-
extended	5	-	-		Yes	Yes	AK360042	HC	5	131.67	506583400	Transcription factor, FAR1-related;Zinc finger, SWIM-type;MULE transposase, conserved domain;Zinc finger, PMZ-type;AT hook, DNA-binding motif	IPR004330,IPR007527,IPR018289,IPR006564,IPR017956	PF03101,PF04434,PF10551,PS50966,SM00575,SM00384	GO:0008270	GO:0003677
extended	5	-	-		Yes	Yes	AK363040	HC	5	131.67	506583400	Tetraspanin	IPR018499	PF00335,PTHR19282,PTHR19282:SF137	GO:0016021
extended	5	-	-		Yes	Yes	AK367366	HC	5	131.67	506583400	Oligopeptide transporter	IPR000109	PTHR11654:SF37,PTHR11654,PF00854	GO:0016020	GO:0006857	GO:0005215
extended	5	-	-		Yes	Yes	AK371585	HC	5	131.67	506583400	Fumarate reductase/succinate dehydrogenase, FAD-binding site;Fumarate reductase/succinate dehydrogenase flavoprotein, N-terminal;Fumarate reductase/succinate dehydrogenase flavoprotein, C-terminal	IPR003952,IPR003953,IPR004112	PTHR11632:SF5,PS00504,PF00890,PTHR11632,PF02910	GO:0055114	GO:0016491	GO:0016491	GO:0055114	GO:0009055	GO:0016491	GO:0055114
extended	5	-	-		Yes	Yes	MLOC_17956.6	HC	5	131.67	506583400	N-acetylglucosaminyl transferase component	IPR007720	PF05024	GO:0016021	GO:0017176	GO:0006506
extended	5	-	-		Yes	Yes	MLOC_36533.4	HC	5	131.67	506583400	NB-ARC	IPR002182	PF00931	GO:0006915	GO:0005524
extended	5	-	-		Yes	Yes	MLOC_66348.2	HC	5	131.67	506583400	No apical meristem (NAM) protein	IPR003441	PF02365	GO:0006355	GO:0003677
extended	5	-	-		Yes	Yes	MLOC_66827.1	HC	5	131.67	506583400	AMP-dependent synthetase/ligase	IPR000873	PF00501	GO:0003824	GO:0008152
extended	5	-	-		Yes	Yes	MLOC_79498.2	HC	5	131.67	506583400	Peptidase C1A, papain C-terminal;Proteinase inhibitor I29, cathepsin propeptide	IPR000668,IPR013201	PF00112,PF08246	GO:0008234	GO:0006508
alignment	5	131.67	506583400	609491634	No	No	AK358410	LC	5	131.67	506583400	-	-	-	-
alignment	5	131.67	506583400		No	No	MLOC_10551.1	LC	5	131.67	506583400	-	-	-	-
alignment	5	131.67	506583400		No	No	MLOC_17957.2	LC	5	131.67	506583400	-	-	-	-
alignment	5	131.67	506583400		No	No	MLOC_18615.1	LC	5	131.67	506583400	-	-	-	-
alignment	5	131.67	506583400		No	No	MLOC_18616.1	LC	5	131.67	506583400	-	-	-	-
alignment	5	131.67	506583400		No	No	MLOC_20653.1	LC	5	131.67	506583400	-	-	-	-
alignment	5	131.67	506583400		No	No	MLOC_20654.1	LC	5	131.67	506583400	-	-	-	-
alignment	5	131.67	506583400		No	No	MLOC_21957.5	LC	5	131.67	506583400	-	-	-	-
alignment	5	131.67	506583400		No	No	MLOC_21958.1	LC	5	131.67	506583400	-	-	-	-
alignment	5	131.67	506583400		No	No	MLOC_21959.4	LC	5	131.67	506583400	-	-	-	-
alignment	5	131.67	506583400		No	No	MLOC_21960.1	LC	5	131.67	506583400	-	-	-	-
alignment	5	131.67	506583400		No	No	MLOC_22457.1	LC	5	131.67	506583400	-	-	-	-
alignment	5	131.67	506583400		No	No	MLOC_38141.1	LC	5	131.67	506583400	-	-	-	-
alignment	5	131.67	506583400		No	No	MLOC_44388.1	LC	5	131.67	506583400	-	-	-	-
alignment	5	131.67	506583400		No	No	MLOC_63668.1	LC	5	131.67	506583400	-	-	-	-
alignment	5	131.67	506583400		No	No	MLOC_71513.1	LC	5	131.67	506583400	-	-	-	-
alignment	5	131.67	506583400		No	No	MLOC_73140.1	LC	5	131.67	506583400	-	-	-	-
alignment	5	131.67	506583400		No	No	MLOC_79499.1	LC	5	131.67	506583400	-	-	-	-
alignment	5	131.67	506583400		No	No	MLOC_79562.1	LC	5	131.67	506583400	-	-	-	-
extended	5	-	-		Yes	Yes	AK376987	HC	5	131.7	506583400	RNA polymerase Rpb7, N-terminal;RNA polymerase III, subunit Rpc25	IPR005576,IPR013238	PF03876,PTHR12709:SF2,PTHR12709,PF08292	GO:0003899	GO:0006351
extended	5	-	-		Yes	Yes	MLOC_4524.3	HC	5	131.7	506583400	-	-	-	-
extended	5	-	-		Yes	Yes	MLOC_58652.1	LC	5	132.15	506583400	-	-	-	-
extended	5	-	-		Yes	Yes	MLOC_58653.1	LC	5	132.15	506583400	-	-	-	-
extended	5	-	-		Yes	Yes	MLOC_58654.1	LC	5	132.15	506583400	-	-	-	-
extended	5	-	-		Yes	Yes	MLOC_58655.1	LC	5	132.15	506583400	-	-	-	-
extended	5	-	-		Yes	Yes	MLOC_58656.1	LC	5	132.15	506583400	-	-	-	-
extended	5	-	-		Yes	Yes	MLOC_23071.1	LC	5	132.69	506583400	-	-	-	-
extended	5	-	-		Yes	Yes	MLOC_23072.1	LC	5	132.69	506583400	-	-	-	-
extended	5	-	-		Yes	Yes	MLOC_52968.1	LC	5	132.69	506583400	-	-	-	-
extended	5	-	-		Yes	Yes	MLOC_10460.1	LC	5	133.19	506583400	-	-	-	-
extended	5	-	-		Yes	Yes	MLOC_10461.1	LC	5	133.19	506583400	-	-	-	-
extended	5	-	-		Yes	Yes	MLOC_70664.2	HC	5	133.23	506583400	Lipoxygenase, plant;Lipoxygenase;Lipoxygenase, C-terminal;Lipoxygenase, LH2;Lipoxygenase, conserved site;Lipoxygenase, iron binding site	IPR001246,IPR000907,IPR013819,IPR001024,IPR020834,IPR020833	PR00468,PTHR11771,PF00305,PF01477,PS51393,PR00087,SM00308,PS00081,PTHR11771:SF2,PS00711,PS50095	GO:0005506	GO:0016165	GO:0055114	GO:0016702	GO:0055114	GO:0046872	GO:0055114	GO:0016702	GO:0046872	GO:0005515
extended	5	-	-		Yes	Yes	AK368629	HC	5	133.47	506583400	Protein of unknown function DUF1068	IPR010471	PF06364,PTHR17695
extended	5	-	-		Yes	Yes	MLOC_10360.2	HC	5	133.69	506583400	NB-ARC	IPR002182	PF00931	GO:0006915	GO:0005524
extended	5	-	-		Yes	Yes	MLOC_38518.1	LC	5	134.38	506583400	-	-	-	-
extended	5	-	-		Yes	Yes	MLOC_38519.1	LC	5	134.38	506583400	-	-	-	-
extended	5	-	-		Yes	Yes	MLOC_31742.1	LC	5	134.53	506583400	-	-	-	-
extended	5	-	-		Yes	Yes	MLOC_14443.1	LC	5	134.72	506678880	-	-	-	-
extended	5	-	-		Yes	Yes	MLOC_14444.1	LC	5	134.72	506678880	-	-	-	-
extended	5	-	-		Yes	Yes	MLOC_22585.1	LC	5	134.72	506678880	-	-	-	-
extended	5	-	-		Yes	Yes	MLOC_22586.2	LC	5	134.72	506678880	-	-	-	-
extended	5	-	-		Yes	Yes	MLOC_22587.1	LC	5	134.72	506678880	-	-	-	-
extended	5	-	-		Yes	Yes	MLOC_55331.1	LC	5	134.72	506678880	-	-	-	-
extended	5	-	-		Yes	Yes	MLOC_55332.2	LC	5	134.72	506678880	-	-	-	-
extended	5	-	-		Yes	Yes	MLOC_55333.1	LC	5	134.72	506678880	-	-	-	-
extended	5	-	-		Yes	Yes	MLOC_55334.1	LC	5	134.72	506678880	-	-	-	-
extended	5	-	-		Yes	Yes	MLOC_72430.1	LC	5	134.72	506678880	-	-	-	-
extended	5	-	-		Yes	Yes	MLOC_72847.1	LC	5	134.72	506678880	-	-	-	-
extended	5	-	-		Yes	Yes	MLOC_73201.1	LC	5	134.72	506678880	-	-	-	-
extended	5	-	-		Yes	Yes	MLOC_76068.1	LC	5	134.72	506678880	-	-	-	-
extended	5	-	-		Yes	Yes	MLOC_76069.1	LC	5	134.72	506678880	-	-	-	-
extended	5	-	-		Yes	Yes	MLOC_76070.1	LC	5	134.72	506678880	-	-	-	-
extended	5	-	-		Yes	Yes	MLOC_76587.1	LC	5	134.72	506678880	-	-	-	-
extended	5	-	-		Yes	Yes	MLOC_4698.1	LC	5	134.72	509518480	-	-	-	-
extended	5	-	-		Yes	Yes	AK248954.1	HC	5	134.72	506583400	-	-	-	-
extended	5	-	-		Yes	Yes	AK371672	HC	5	134.72	506583400	Cullin homology;Cullin protein, neddylation domain;Cullin, N-terminal	IPR016158,IPR019559,IPR001373	PS50069,PTHR11932:SF53,SM00182,SM00884,PF00888,PF10557,PTHR11932	GO:0006511	GO:0031625	GO:0031461	GO:0006511	GO:0031461	GO:0031625	GO:0031461	GO:0006511	GO:0031625
extended	5	-	-		Yes	Yes	MLOC_10567.1	HC	5	134.72	506678880	IMP dehydrogenase/GMP reductase	IPR001093	PF00478	GO:0003824	GO:0055114
extended	5	-	-		Yes	Yes	MLOC_44818.1	HC	5	134.72	506678880	-	-	-	-
extended	5	-	-		Yes	Yes	MLOC_76586.1	HC	5	134.72	506678880	-	-	-	-
extended	5	-	-		Yes	Yes	AK250680.1	HC	5	134.72	509518480	-	-	-	-
extended	5	-	-		Yes	Yes	AK368002	HC	5	134.72	509518480	-	-	-	-
extended	5	-	-		Yes	Yes	MLOC_61300.1	HC	5	134.72	509518480	-	-	-	-
extended	5	-	-		Yes	Yes	MLOC_61302.1	HC	5	134.72	509518480	-	-	-	-
extended	5	-	-		Yes	Yes	MLOC_62114.2	HC	5	134.72	509518480	Calmodulin binding protein-like	IPR012416	PF07887
extended	5	-	-		Yes	Yes	MLOC_66071.3	HC	5	134.72	509518480	Calmodulin binding protein-like	IPR012416	PF07887
extended	5	-	-		Yes	Yes	MLOC_66074.2	HC	5	134.72	509518480	Photosystem I PsaF, reaction centre subunit III	IPR003666	PF02507	GO:0009522	GO:0009538	GO:0015979
extended	5	-	-		Yes	Yes	MLOC_66343.1	HC	5	134.72	509518480	-	-	-	-
extended	5	-	-		Yes	Yes	MLOC_7003.1	HC	5	134.72	509518480	Heat shock protein DnaJ, N-terminal	IPR001623	PF00226	GO:0031072
extended	5	-	-		Yes	Yes	MLOC_70077.2	HC	5	134.72	509518480	-	-	-	-
extended	5	-	-		Yes	Yes	MLOC_12557.1	LC	5	135.03	509518480	-	-	-	-
extended	5	-	-		Yes	Yes	MLOC_14823.1	LC	5	135.03	509518480	-	-	-	-
extended	5	-	-		Yes	Yes	MLOC_14824.1	LC	5	135.03	509518480	-	-	-	-
extended	5	-	-		Yes	Yes	MLOC_26479.1	LC	5	135.03	509518480	-	-	-	-
extended	5	-	-		Yes	Yes	MLOC_43124.1	LC	5	135.03	509518480	-	-	-	-
extended	5	-	-		Yes	Yes	MLOC_4790.1	LC	5	135.03	509518480	-	-	-	-
extended	5	-	-		Yes	Yes	MLOC_4791.1	LC	5	135.03	509518480	-	-	-	-
extended	5	-	-		Yes	Yes	MLOC_66211.1	LC	5	135.03	509518480	-	-	-	-
extended	5	-	-		Yes	Yes	MLOC_66970.1	LC	5	135.03	509518480	-	-	-	-
extended	5	-	-		Yes	Yes	MLOC_74796.1	LC	5	135.03	509518480	-	-	-	-
extended	5	-	-		Yes	Yes	MLOC_74797.1	LC	5	135.03	509518480	-	-	-	-
extended	5	-	-		Yes	Yes	MLOC_74798.1	LC	5	135.03	509518480	-	-	-	-
extended	5	-	-		Yes	Yes	MLOC_74799.1	LC	5	135.03	509518480	-	-	-	-
extended	5	-	-		Yes	Yes	MLOC_74800.1	LC	5	135.03	509518480	-	-	-	-
extended	5	-	-		Yes	Yes	MLOC_7579.1	LC	5	135.03	509518480	-	-	-	-
extended	5	-	-		Yes	Yes	MLOC_79258.1	LC	5	135.03	509518480	-	-	-	-
extended	5	-	-		Yes	Yes	AK362975	HC	5	135.03	509518480	Ribose 5-phosphate isomerase, type A	IPR004788	PTHR11934,PF06026	GO:0004751	GO:0009052
extended	5	-	-		Yes	Yes	MLOC_12556.1	HC	5	135.03	509518480	-	-	-	-
extended	5	-	-		Yes	Yes	MLOC_4789.1	HC	5	135.03	509518480	VQ	IPR008889	PF05678
extended	5	-	-		Yes	Yes	MLOC_66212.1	HC	5	135.03	509518480	-	-	-	-
extended	5	-	-		Yes	Yes	AK365628	LC	5	135.07	510044240	-	-	-	-
extended	5	-	-		Yes	Yes	MLOC_1274.1	LC	5	135.07	510044240	-	-	-	-
extended	5	-	-		Yes	Yes	MLOC_1275.1	LC	5	135.07	510044240	-	-	-	-
extended	5	-	-		Yes	Yes	MLOC_79260.1	LC	5	135.07	510044240	-	-	-	-
extended	5	-	-		Yes	Yes	AK358551	HC	5	135.07	510044240	-	-	-	-
extended	5	-	-		Yes	Yes	MLOC_1273.1	HC	5	135.07	510044240	-	-	-	-
extended	5	-	-		Yes	Yes	MLOC_60261.1	HC	5	135.07	510044240	Pentatricopeptide repeat	IPR002885	PF01535
extended	5	-	-		Yes	Yes	MLOC_6875.2	HC	5	135.07	510044240	Reticulon	IPR003388	PS50845,PTHR10994,PTHR10994:SF27,PF02453	GO:0005783
extended	5	-	-		Yes	Yes	MLOC_74288.1	LC	5	135.24	510044240	-	-	-	-
extended	5	-	-		Yes	Yes	MLOC_74289.1	LC	5	135.24	510044240	-	-	-	-
extended	5	-	-		Yes	Yes	MLOC_36447.1	LC	5	135.35	510044240	-	-	-	-
extended	5	-	-		Yes	Yes	MLOC_36448.1	LC	5	135.35	510044240	-	-	-	-
extended	5	-	-		Yes	Yes	MLOC_36449.1	LC	5	135.35	510044240	-	-	-	-
extended	5	-	-		Yes	Yes	MLOC_36450.1	LC	5	135.35	510044240	-	-	-	-
extended	5	-	-		Yes	Yes	MLOC_4861.1	HC	5	135.35	510044240	Pentatricopeptide repeat	IPR002885	PF01535
extended	5	-	-		Yes	Yes	AK252610.1	HC	5	135.35	510643160	Cell differentiation, Rcd1-like	IPR007216	PTHR12262,PF04078
extended	5	-	-		Yes	Yes	AK356944	HC	5	135.35	510643160	Gnk2-homologous domain	IPR002902	PS51473,PF01657,PTHR11795,PTHR11795:SF83
extended	5	-	-		Yes	Yes	MLOC_56888.4	HC	5	135.35	510643160	Arv1 protein	IPR007290	PTHR14467,PF04161
extended	5	-	-		Yes	Yes	MLOC_58342.2	HC	5	135.35	510643160	Protein of unknown function DUF248, methyltransferase putative	IPR004159	PF03141	GO:0008168
extended	5	-	-		Yes	Yes	MLOC_58395.2	HC	5	135.35	510643160	AP complex, mu/sigma subunit	IPR022775	PF01217
extended	5	-	-		Yes	Yes	MLOC_62889.1	HC	5	135.35	510643160	-	-	-	-
extended	5	-	-		Yes	Yes	MLOC_75599.1	HC	5	135.35	510643160	-	-	-	-
extended	5	-	-		Yes	Yes	AK371401	HC	5	135.37	510643160	Actin-like	IPR004000	PR00190,PF00022,PTHR11937:SF26,PTHR11937,SM00268
extended	5	-	-		Yes	Yes	AK364247	HC	5	135.38	510643160	Helix-loop-helix DNA-binding domain	IPR001092	PS50888,SM00353,PF00010,PTHR12565	GO:0006355
aMarker located in the extended ±4cM intervall (extended), position of best sequence alignment (alignment)

[truncated: 14 more sheets: QPs.5H-2,  QPs.6H-1, QPs.7H-1, QPh.2H-1, QPh.2H-2, QPh.4H-1, QPh.4H-2, QPh.5H-1, QPh.6H-1, QPh.6H-2, QPh.6H-3, QPh.7H-1, QPh.7H-2, QPh.7H-3]
